# Supplementary material for: Longitudinal Patterns of Attention-Deficit/Hyperactivity Disorder Children in Shanghai, China
Source: Research Square preprint supplement (doi:10.21203/rs.3.rs-5702346/v1), 2025-04-14
Supplement: Supplementary file 1 [file 92f6198bf31eb2d8533fd310.xlsx]

## Sheet: Participants
儿童唯一识别号	conners患者编号	VIQ语言智力	PIQ操作智力	FIQ总智力	Graduation class or not是否毕业班	gender性别	出生日期	预产期Expected delivery date	SGA小于胎龄儿	胎龄(周)gestational weeks	胎龄(天)	出生体重birth weight	是否早产Premature birth or not	父亲出生日期	父亲生育年龄	母亲出生日期	母亲生育年龄	父亲身高	父亲体重	父亲BMI	母亲身高	母亲体重	母亲BMI	受孕方式conception method	分娩方式delivery method	出生及新生儿期情况neonatal condition,	母亲妊娠期间有无保胎Pregnancy preservation during the mother's pregnancy	母亲怀孕期间有无妊娠合并症maternal complications during pregnancy	母亲妊娠期间有无使用药物medication use during pregnancy	胎次parity	产次gravidity	婴儿期6月龄内主要喂养方式	婴幼儿期纯母乳喂养时间(月)	养育是否以隔代为主 grandparental caregiving	电子屏幕使用时间(小时/天)daily hours of screen time	测评年龄	纠正年龄	测评年龄数值	纠正年龄数值	封控起始时间	测评时年龄age	Subtypes of ADHD亚型	注意缺陷（>=2症状数）	多动冲动（>=2症状数）	对立违抗（>=2症状数）	品行障碍（>=2症状数）	焦虑抑郁（>=2症状数）	注意缺陷（总分）注意力缺陷型 total scores	多动冲动（总分）hyperactive impulsive total score scores
A10829	ZL10952	59	101	78	no	男	2015-05-31	2015-05-22	AGA（适于胎龄儿）	41	2	4250	足月儿	1989-10-15	25	1997-06-09	17	173	85	28.4	158	65	26.04	自然怀孕	剖宫产	无	未保胎,孕早期保胎（怀孕前3月）	无	未使用药物	1	1	纯母乳喂养	24	否	2.5	5岁3月25天	5岁3月25天	5.32	5.32	2020-01-31	#REF!	注意力缺陷型	6	1	2	0	0	17	7
A11751	ZL11874	88	95	90	no	女	2012-02-22	2012-03-04	AGA（适于胎龄儿）	38	3	3400	足月儿	1988-04-18	23	1995-01-19	17	173	92	30.74	154	39	16.44	自然怀孕	剖宫产	无	未保胎	无	未使用药物	1	1	纯母乳喂养	9	是	2	8岁9月6天	8岁9月6天	8.77	8.77	2020-01-31	#REF!	混合型	7	5	3	0	0	21	16
A10849	ZL10972	72.96		72.96	no	男	2011-06-10	2011-06-10	AGA（适于胎龄儿）	40	0	3300	足月儿	1991-05-11	20	1992-07-28	18	178	60	18.94	168	60	21.26	自然怀孕	顺产	无	未保胎	无	未使用药物	1	1	纯母乳喂养	12	否	0	9岁3月15天	9岁3月15天	9.29	9.29	2020-01-31	#REF!	注意力缺陷型	9	1	0	0	4	24	7
A11952	ZL12075	92	113	102	no	男	2011-03-07	2011-03-07	AGA（适于胎龄儿）	40	0	3300	足月儿	1988-02-12	23	1992-10-17	18	170	68	23.53	160	50	19.53	自然怀孕	剖宫产	无	未保胎	无	未使用药物	1	1	纯母乳喂养	14	否	3	9岁7月2天	9岁7月2天	9.59	9.59	2020-01-31	#REF!	混合型	9	7	2	1	0	26	22
A12671	ZL12794	84	89	85	no	男	2014-05-07	2014-04-23	SGA（小于胎龄儿）	42	0	2850	过期产儿	1989-02-02	25	1996-01-28	18	189	75	21	165	63	23.14	自然怀孕	剖宫产	无	孕中期保胎（怀孕4-6月）	无	未使用药物	1	1	混合喂养（母乳为主）	7	是	2.5	6岁5月12天	6岁5月12天	6.45	6.45	2020-01-31	#REF!	混合型	6	9	8	3	0	15	18
A22700	ZL22822	80	108	91	no	男	2008-08-05	2008-08-05	SGA（小于胎龄儿）	40	0	2500	足月儿	1986-09-20	21	1989-09-12	18	175	65	21.22	162	46	17.53	自然怀孕	顺产	无	未保胎	无		1	1					12岁7月6天	12岁7月6天	12.6	12.6	2020-01-31	#REF!	混合型	2	2	0	0	0	10	10
A10334	ZL10457	91	79	83	no	男	2013-02-05	2013-01-29	AGA（适于胎龄儿）	41	0	3200	足月儿	1991-01-01	22	1993-06-16	19	172	65	43.94	160	70	54.69	自然怀孕	顺产	无	未保胎	无	未使用药物	1	1	纯母乳喂养	12	否	0.5	7岁7月15天	7岁7月15天	7.62	7.62	2020-01-31	#REF!	注意力缺陷型	0	0	0	0	0	9	5
A10705	ZL10828	77	89	80	no	男	2014-03-01	2014-03-22	LGA（大于胎龄儿）	37	0	8000	足月儿	1993-07-02	20	1994-05-02	19	170	50	17.3	165	60	44.08	自然怀孕	顺产	无	未保胎	无	未使用药物	1	1	混合喂养（母乳为主）	0	否	2	6岁6月23天	6岁6月23天	6.56	6.56	2020-01-31	#REF!	混合型	7	7	1	0	0	21	19
A25609	ZL25731	104.13		104.13	no	男	2011-02-21	2011-02-21	SGA（小于胎龄儿）	40	0	2700	足月儿	1989-12-23	21	1991-04-18	19	170	98	33.91	163	53	19.95	自然怀孕	顺产	无	未保胎	无		1	2					10岁1月23天	10岁1月23天	10.15	10.15	2020-01-31	#REF!	混合型	9	8	7	3	5	27	21
A31572	ZL31693	111	115	116	no	男	2014-07-06	2014-07-06	SGA（小于胎龄儿）	40	0	4800	足月儿	1996-02-01	18	1995-05-15	19	182	80	48.3	158	55	44.06	自然怀孕	顺产	无	未保胎	有		1	1					7岁0月1天	7岁0月1天	7	7	2020-01-31	#REF!	注意力缺陷型	6	2	3	2	0	18	10
A10681	ZL10804	87	101	92	no	男	2011-11-05	2011-11-05	AGA（适于胎龄儿）	40	0	3000	足月儿	1990-07-08	21	1991-10-06	20	178	75	473425.07	160	64	50	自然怀孕	顺产	无	未保胎	无	未使用药物	1	1	纯母乳喂养	6	否	0.5	8岁10月18天	8岁10月18天	8.88	8.88	2020-01-31	#REF!	混合型	1	2	1	2	0	10	9
A11077	ZL11200	70	78	70	no	男	2011-07-07	2011-07-15	SGA（小于胎龄儿）	38	6	2850	足月儿	1982-10-17	28	1990-12-07	20	170	67.5	467128.03	163	50	376378.49	自然怀孕	顺产	无	未保胎	无	未使用药物	1	1	纯母乳喂养	12	是	4	9岁6月28天	9岁6月28天	9.58	9.58	2020-01-31	#REF!	混合型	9	7	8	0	3	25	21
A11227	ZL11350	81.57		81.57	no	女	2011-07-25	2011-07-23	AGA（适于胎龄儿）	40	2	3500	足月儿	1988-05-20	23	1990-11-13	20	165	72	26.45	160	48	18.75	自然怀孕	剖宫产	无	未保胎	无	未使用药物	1	1	混合喂养（母乳为主）	10	否	1.5	9岁2月5天	9岁2月5天	9.18	9.18	2020-01-31	#REF!	注意力缺陷型	4	0	0	0	0	12	2
A11593	ZL11716	82	87	82	no	女	2011-11-19	2011-11-19	AGA（适于胎龄儿）	40	0	3200	足月儿	1985-11-12	26	1991-09-24	20	168	52	18.42	155	48	19.98	自然怀孕	顺产	无	未保胎	无	未使用药物	1	1	混合喂养（配方奶为主）	3	否	0.5	8岁10月17天	8岁10月17天	8.88	8.88	2020-01-31	#REF!	注意力缺陷型	8	1	0	1	1	25	8
A13450	ZL13573	90	100	95	no	男	2015-06-01	2015-06-04	AGA（适于胎龄儿）	39	4	3000	足月儿	1994-04-18	21	1994-10-01	20	177	75	23.94	160	65	25.39	自然怀孕	剖宫产	无	未保胎	有	未使用药物	1	1	纯母乳喂养	20	否	5	5岁4月26天	5岁4月26天	5.4	5.4	2020-01-31	#REF!	注意力缺陷型	5	3	3	0	1	15	11
A14408	ZL14531	73	96	82	no	男	2013-05-03	2013-05-03	SGA（小于胎龄儿）	40	0	4000	足月儿	1990-12-04	22	1993-01-19	20	176	60	19.37	168	90	31.89	自然怀孕	剖宫产	无	未保胎	无	未使用药物	1	1	混合喂养（配方奶为主）	3	否	3	7岁6月3天	7岁6月3天	7.51	7.51	2020-01-31	#REF!	注意力缺陷型	6	3	0	0	0	17	10
A25588	ZL25710	78	75	74	no	男	2014-05-12	2014-05-24	AGA（适于胎龄儿）	38	2	3290	足月儿	1989-05-22	24	1993-05-19	20	185	100	29.22	156	45	36.98	自然怀孕	剖宫产	无	未保胎	无		1	1					6岁11月4天	6岁11月4天	6.93	6.93	2020-01-31	#REF!	注意力缺陷型	6	2	6	3	2	17	10
A28397	ZL28519	70	89	76	no	男	2014-02-09	2014-02-09	AGA（适于胎龄儿）	40	0	3500	足月儿	1989-08-06	24	1993-03-15	20	175	72	23.51	150	43	19.11	自然怀孕	剖宫产	无	未保胎	无		1	1					7岁3月17天	7岁3月17天	7.3	7.3	2020-01-31	#REF!	混合型	7	6	0	0	2	16	16
A43035	ZL43153	93	92	91	no	男	2015-08-31	2015-08-31	SGA（小于胎龄儿）	40	0	4000	足月儿	1994-01-03	21	1994-09-20	20	168	70	49.6	163	55	41.4	自然怀孕	顺产	无	未保胎	无		1	1					6岁2月21天	6岁2月21天	6.22	6.22	2020-01-31	#REF!	混合型	8	9	0	3	0	23	21
A11299	ZL11422	67	87	74	no	男	2010-08-22	2010-09-12	AGA（适于胎龄儿）	37	0	3470	足月儿	1984-09-20	25	1988-11-12	21	170	63	21.8	163	65	247675.66	自然怀孕	顺产	无	未保胎	无	未使用药物	2	2	混合喂养（母乳为主）	6	否	5	10岁1月16天	10岁1月16天	10.13	10.13	2020-01-31	#REF!	注意力缺陷型	8	2	0	1	1	25	8
A11637	ZL11760	101	100	101	no	男	2013-08-20	2013-08-20	AGA（适于胎龄儿）	40	0	3500	足月儿	1993-06-25	20	1992-01-01	21	170	88	30.45	166	60	21.77	自然怀孕	剖宫产	无	未保胎	无	未使用药物	1	1	混合喂养（母乳为主）	0	否	0	7岁1月18天	7岁1月18天	7.13	7.13	2020-01-31	#REF!	混合型	6	9	1	0	0	16	18
A13088	ZL13211	107.86		107.86	no	男	2018-02-02	2018-02-09	AGA（适于胎龄儿）	39	0	3220	足月儿	1997-03-14	20	1996-10-11	21	173	90	30.07	158	60	24.03	自然怀孕	顺产	无	未保胎	无	未使用药物	1	1	混合喂养（配方奶为主）	0	是	2	4岁0月1天	4岁0月1天	4	4	2020-01-31	#REF!	注意力缺陷型	6	3	0	0	0	13	12
A13588	ZL13711	88	102	94	no	男	2014-10-27	2014-10-27	AGA（适于胎龄儿）	40	0	4000	足月儿	1986-09-01	28	1993-07-01	21	176	67.5	43.58	162	45	34.29	自然怀孕	剖宫产	无	未保胎	无	未使用药物	1	1	混合喂养（配方奶为主）	1	否	2	6岁0月1天	6岁0月1天	6	6	2020-01-31	#REF!	多动冲动型	1	6	1	0	0	9	17
A13974	ZL14097	60	96	75	no	男	2012-02-07	2012-02-14	SGA（小于胎龄儿）	39	0	2720	足月儿	1990-03-06	21	1990-10-17	21	174	86	28.41	160	47	18.36	自然怀孕	顺产	无	未保胎	无	未使用药物	1	1	纯母乳喂养	13	否	0	8岁8月24天	8岁8月24天	8.73	8.73	2020-01-31	#REF!	混合型	7	8	1	0	2	21	20
A14580	ZL14703	74	73	70	no	男	2012-01-12	2012-01-12	SGA（小于胎龄儿）	40	0	2650	足月儿	1986-01-16	26	1990-06-12	21	170	75	25.95	163	55	20.7	自然怀孕	剖宫产	无	未保胎	无	未使用药物	1	1	混合喂养（母乳为主）	4	是	2.5	8岁9月29天	8岁9月29天	8.83	8.83	2020-01-31	#REF!	混合型	2	3	2	0	1	10	11
A14854	ZL14977	76	90	80	no	男	2014-05-09	2014-05-08	AGA（适于胎龄儿）	40	1	3850	足月儿	1992-09-25	21	1993-02-20	21	175	70	22.86	160	45	17.58	自然怀孕	顺产	无	未保胎	无	未使用药物	1	1	纯母乳喂养	6	是	1.5	6岁6月2天	6岁6月2天	6.51	6.51	2020-01-31	#REF!	混合型	9	8	4	1	0	25	23
A17151	ZL17273	109	98	103	no	男	2012-03-19	2012-03-19	AGA（适于胎龄儿）	40	0	3400	足月儿	1988-03-23	24	1990-06-30	21	185	90	26.3	178	85	26.83	自然怀孕	剖宫产	无	孕早期保胎（怀孕前3月）	无		1	1					8岁8月22天	8岁8月22天	8.73	8.73	2020-01-31	#REF!	混合型	5	5	0	1	0	18	15
A19457	ZL19579	116	77	96	no	男	2012-07-19	2012-07-19	LGA（大于胎龄儿）	40	0	7000	足月儿	1984-12-07	27	1991-01-27	21							自然怀孕	顺产	无										8岁5月25天	8岁5月25天	8.49	8.49	2020-01-31	#REF!	混合型	8	5	1	1	0	24	16
A23705	ZL23827	86	101	91	no	男	2009-03-20	2009-03-20	SGA（小于胎龄儿）	40	0	2800	足月儿	1979-06-12	29	1988-02-20	21																			12岁0月3天	12岁0月3天	12.01	12.01	2020-01-31	#REF!	混合型	7	9	2	1	0	20	24
A30530	ZL30651	92.08		92.08	no	男	2015-04-10	2015-04-10	AGA（适于胎龄儿）	40	0	3500	足月儿	1989-12-05	25	1993-05-01	21	170	80	27.68	160	60	23.44													6岁2月16天	6岁2月16天	6.21	6.21	2020-01-31	#REF!	混合型	8	9	2	0	0	22	23
A33551	ZL33672	106.86		106.86	no	男	2016-03-08	2016-03-08	AGA（适于胎龄儿）	40	0	3150	足月儿	1991-02-28	25	1994-08-19	21	167	70	25.1	160	54	21.09	自然怀孕	顺产	无	未保胎	无		1	1					5岁4月18天	5岁4月18天	5.38	5.38	2020-01-31	#REF!	多动冲动型	1	5	0	0	0	6	13
A42437	ZL42555	93	89	90	no	男	2011-09-20	2011-09-20	AGA（适于胎龄儿）	40	0	3000	足月儿	1979-05-07	32	1989-11-16	21	175	70	22.86	163	55	20.7	自然怀孕	剖宫产	无	未保胎	无		1	2					10岁1月14天	10岁1月14天	10.12	10.12	2020-01-31	#REF!	混合型	9	9	8	6	4	24	27
A45414	ZL45532	80	98	86	yes	男	2010-06-26	2010-06-26	AGA（适于胎龄儿）	40	0	3200	足月儿	1986-12-28	23	1989-06-04	21													2	1					11岁5月22天	11岁5月22天	11.48	11.48	2020-01-31	#REF!	注意力缺陷型	4	0	0	0	0	14	6
A10673	ZL10796	86	105	94	no	男	2012-07-21	2012-07-20	AGA（适于胎龄儿）	40	1	3900	足月儿	1987-06-23	25	1989-09-18	22	178	76	23.99	167	90	32.27	自然怀孕	顺产	无	未保胎	无	未使用药物	1	1	混合喂养（母乳为主）	3	是	1	8岁2月2天	8岁2月2天	8.17	8.17	2020-01-31	#REF!	注意力缺陷型	6	1	0	0	0	16	6
A10690	ZL10813	85.89		85.89	yes	男	2009-03-18	2009-03-18	SGA（小于胎龄儿）	40	0	2900	足月儿	1981-06-19	27	1986-05-03	22	180	75	23.15	155	70	29.14	自然怀孕	剖宫产	无	未保胎	无	未使用药物	1	1	人工喂养	0	是	0.5	11岁6月6天	11岁6月6天	11.52	11.52	2020-01-31	#REF!	注意力缺陷型	7	3	2	0	0	17	11
A11288	ZL11411	91	106	98	no	男	2013-12-10	2013-12-31	AGA（适于胎龄儿）	37	0	2700	足月儿	1985-01-01	28	1991-08-07	22	183	82.5	24.63	167	55	19.72	自然怀孕	剖宫产	无	未保胎	无	未使用药物	1	1	混合喂养（母乳为主）	6	否	2.5	6岁9月20天	6岁9月20天	6.8	6.8	2020-01-31	#REF!	混合型	2	1	1	0	0	9	9
A11551	ZL11674	68	92	77	yes	男	2009-09-02	2009-09-11	AGA（适于胎龄儿）	38	5	3700	足月儿	1984-01-08	25	1986-11-16	22	168	74	26.22	162	52	19.81	自然怀孕	顺产	无	孕早期保胎（怀孕前3月）	无	未使用药物	3	1	混合喂养（母乳为主）	2	是	1	11岁1月4天	11岁1月4天	11.09	11.09	2020-01-31	#REF!	注意力缺陷型	5	0	2	0	0	16	6
A11585	ZL11708	86	105	94	no	女	2011-07-28	2011-07-21	AGA（适于胎龄儿）	41	0	3400	足月儿	1988-10-10	22	1989-02-07	22	170	70	48.44	160	49	38.28	自然怀孕	顺产	无	未保胎	无	未使用药物	1	1	混合喂养（母乳为主）	12	否	1	9岁2月14天	9岁2月14天	9.21	9.21	2020-01-31	#REF!	混合型	9	6	2	0	4	24	16
A11798	ZL11921	93	110	102	yes	女	2009-11-10	2009-11-10	SGA（小于胎龄儿）	40	0	3750	足月儿	1984-03-20	25	1987-04-08	22	165	60	22.04	164	60	44.62	自然怀孕	顺产	无	未保胎	无	未使用药物	1	1	混合喂养（母乳为主）	6	否	0.5	11岁0月18天	11岁0月18天	11.05	11.05	2020-01-31	#REF!	注意力缺陷型	4	1	0	0	0	10	7
A12713	ZL12836	81	82	78	no	男	2013-11-05	2013-11-08	AGA（适于胎龄儿）	39	4	3500	足月儿	1992-09-07	21	1991-09-19	22	170	55	19.03	162	51	19.43	自然怀孕	剖宫产	无	未保胎	无	未使用药物	1	1	混合喂养（配方奶为主）	0	否	1	6岁11月14天	6岁11月14天	6.96	6.96	2020-01-31	#REF!	混合型	6	7	3	0	0	15	19
A12852	ZL12975	93	102	97	no	男	2012-08-21	2012-08-24	AGA（适于胎龄儿）	39	4	3720	足月儿	1988-11-23	23	1989-12-30	22	182	100	30.19	160	72	28.12	自然怀孕	顺产	无	未保胎	无	未使用药物	1	1	混合喂养（母乳为主）	6	是	1.5	8岁1月30天	8岁1月30天	8.17	8.17	2020-01-31	#REF!	混合型	7	5	7	1	6	20	15
A13223	ZL13346	68	96	79	no	男	2014-08-03	2014-07-29	AGA（适于胎龄儿）	40	5	3150	足月儿	1990-02-26	24	1992-02-06	22	176	70	22.6	162	51	19.43	自然怀孕	顺产	无	未保胎	无	未使用药物	3	1	纯母乳喂养	14	否	3	6岁2月21天	6岁2月21天	6.22	6.22	2020-01-31	#REF!	混合型	1	0	0	0	0	9	8
A15669	ZL15791	67	80	70	no	男	2015-08-11	2015-10-03	LGA（大于胎龄儿）	32	3	2500	早产儿	1993-03-07	22	1993-06-30	22	178	65	20.52	158	50	20.03	自然怀孕	顺产	颅内出血	未保胎	无		1	1					5岁3月9天	5岁3月9天	5.27	5.27	2020-01-31	#REF!	混合型	0	0	0	0	0	7	7
A15737	ZL15859	113.8		113.8	no	男	2014-01-24	2014-01-24	AGA（适于胎龄儿）	40	0	3000	足月儿	1986-08-11	27	1991-10-10	22	180	90	0	168	65	0	自然怀孕	剖宫产	无	未保胎	无		2	2					6岁9月27天	6岁9月27天	6.82	6.82	2020-01-31	#REF!	注意力缺陷型	1	0	0	0	0	5	1
A18357	ZL18479	119.49		119.49	no	男	2013-08-18	2013-08-11	AGA（适于胎龄儿）	41	0	3500	足月儿	1986-04-23	27	1990-10-21	22	178	99	31.25	158	53	21.23	自然怀孕	顺产	无	未保胎	无		3	1					7岁4月7天	7岁4月7天	7.35	7.35	2020-01-31	#REF!	混合型	6	3	5	1	2	17	14
A18905	ZL19027	91	90	89	no	男	2014-08-22	2014-09-12	AGA（适于胎龄儿）	37	0	2400	足月儿	1987-10-28	26	1991-12-01	22	171	68	46.51	158	52.5	42.06	自然怀孕	顺产	无	未保胎	无		1	1					6岁4月13天	6岁4月13天	6.37	6.37	2020-01-31	#REF!	混合型	8	6	1	0	0	22	16
A19186	ZL19308	66	89	74	no	男	2012-07-21	2012-08-04	AGA（适于胎龄儿）	38	0	2850	足月儿	1988-11-25	23	1990-07-12	22	170	60	20.76	168	53	18.78	自然怀孕	顺产	无	未保胎	无		1	1					8岁5月18天	8岁5月18天	8.47	8.47	2020-01-31	#REF!	混合型	9	8	2	0	0	20	20
A22936	ZL23058	76	93	82	no	男	2011-03-29	2011-03-29	AGA（适于胎龄儿）	40	0	3150	足月儿	1989-05-11	21	1989-01-01	22	180	75	23.15	158	60	24.03	自然怀孕	剖宫产	无										9岁11月17天	9岁11月17天	9.96	9.96	2020-01-31	#REF!	混合型	9	8	4	1	3	24	20
A24678	ZL24800	102	86	94	no	男	2011-01-27	2011-01-27	LGA（大于胎龄儿）	40	0	4600	足月儿	1987-06-26	23	1988-07-20	22	176	90	58.11	166	60	43.55	自然怀孕	剖宫产	无	未保胎	无		1	1					10岁2月9天	10岁2月9天	10.19	10.19	2020-01-31	#REF!	混合型	8	8	3	1	0	21	18
A25112	ZL25234	94	120	106	no	男	2014-05-31	2014-05-31	AGA（适于胎龄儿）	40	0	3050	足月儿	1986-10-06	27	1991-11-18	22	178	79	24.93	159	54	21.36	自然怀孕	顺产	无	未保胎	无		3	1					6岁10月10天	6岁10月10天	6.86	6.86	2020-01-31	#REF!	混合型	1	1	0	0	0	7	8
A25729	ZL25851	86	98	90	no	女	2012-07-31	2012-07-31	SGA（小于胎龄儿）	40	0	2509	足月儿	1989-05-01	23	1989-11-09	22	180	70	43.21	165	95	34.89	自然怀孕	顺产	无	未保胎	无			1					8岁8月18天	8岁8月18天	8.72	8.72	2020-01-31	#REF!	多动冲动型	4	3	4	1	4	12	13
A26200	ZL26322	111	113	115	no	男	2012-05-20	2012-05-20	AGA（适于胎龄儿）	40	0	3000	足月儿	1987-06-25	24	1989-09-16	22	178	75	23.67	150	51	22.67													8岁11月4天	8岁11月4天	8.93	8.93	2020-01-31	#REF!	混合型	6	9	1	0	3	19	25
A29018	ZL29140	116	104	112	yes	男	2009-10-21	2009-10-28	AGA（适于胎龄儿）	39	0	3100	足月儿	1983-10-26	26	1987-10-08	22	180	90	27.78	163	55	20.7	自然怀孕	顺产	无	未保胎	无		1	1					11岁7月15天	11岁7月15天	11.62	11.62	2020-01-31	#REF!	注意力缺陷型	2	0	0	0	2	11	0
A31922	ZL32043	88.7		88.7	no	男	2013-03-12	2013-03-12	LGA（大于胎龄儿）	40	0	4300	足月儿	1988-01-07	25	1990-11-02	22	180	90	27.78	161	70	27.01	自然怀孕	剖宫产	无	未保胎	无		1	1					8岁3月28天	8岁3月28天	8.33	8.33	2020-01-31	#REF!	混合型	5	6	0	0	0	13	15
A38387	ZL38507	131.66		131.66	no	男	2014-05-03	2014-04-30	AGA（适于胎龄儿）	40	3	3600	足月儿	1988-10-03	25	1991-11-08	22	165	75	27.55	163	55	20.7	自然怀孕	剖宫产	无	未保胎	无		1	1					7岁4月15天	7岁4月15天	7.37	7.37	2020-01-31	#REF!	混合型	6	8	1	0	2	19	22
A39577	ZL39695	97.4		97.4	no	男	2014-12-17	2014-12-24	AGA（适于胎龄儿）	39	0	3400	足月儿	1993-03-20	21	1992-07-05	22	180	75	23.15	158	52	20.83	自然怀孕	顺产	无		无		1	1					6岁9月18天	6岁9月18天	6.8	6.8	2020-01-31	#REF!	多动冲动型	0	2	0	0	0	3	7
A8874	ZL9001	90.97		90.97	yes	男	2009-07-24	2009-08-10	AGA（适于胎龄儿）	37	4	3500	足月儿	1986-11-05	22	1987-07-12	22	170	85	29.41	160	60	23.44	自然怀孕	顺产	无	未保胎	无	未使用药物	1	1	纯母乳喂养	12	否	0	11岁1月12天	11岁1月12天	11.12	11.12	2020-01-31	#REF!	混合型	8	7	0	0	0	19	19
A9631	ZL9754	89.82		89.82	no	男	2008-07-21	2008-07-21	LGA（大于胎龄儿）	40	0	4300	足月儿	1980-11-14	27	1986-03-15	22	183	74	22.1	168	70	24.8	自然怀孕	剖宫产	无	孕早期保胎（怀孕前3月）	无	未使用药物	1	1	人工喂养	0	否	1	12岁1月22天	12岁1月22天	12.14	12.14	2020-01-31	#REF!	混合型	9	5	4	1	2	23	14
A9946	ZL10069	102.34		102.34	no	男	2015-07-04	2015-07-06	AGA（适于胎龄儿）	39	5	3550	足月儿	1992-06-18	23	1991-12-19	23	172	60	20.28	160	50	19.53	自然怀孕	顺产	无	未保胎	无	未使用药物	1	1	纯母乳喂养	18	否	1	5岁2月12天	5岁2月12天	5.2	5.2	2020-01-31	#REF!	混合型	5	8	4	0	1	14	23
A10856	ZL10979	84	90	86	no	男	2012-11-16	2012-11-16	AGA（适于胎龄儿）	40	0	3500	足月儿	1985-01-02	27	1989-10-04	23	178	73	23.04	164	53	19.71	自然怀孕	顺产	无	孕早期保胎（怀孕前3月）	有	未使用药物	2	1	混合喂养（配方奶为主）	3	是	3	7岁10月9天	7岁10月9天	7.86	7.86	2020-01-31	#REF!	混合型	9	9	1	0	0	23	24
A10869	ZL10992	98	95	96	no	男	2012-12-25	2013-01-01	AGA（适于胎龄儿）	39	0	3000	足月儿	1973-04-10	39	1989-08-15	23	189	82	22.96	165	50	18.37	自然怀孕	剖宫产	无	未保胎	无	未使用药物	1	1	人工喂养	1	是	1	7岁9月0天	7岁9月0天	7.75	7.75	2020-01-31	#REF!	混合型	9	6	2	0	0	24	17
A11207	ZL11330	92	106	99	no	女	2012-06-03	2012-05-27	AGA（适于胎龄儿）	41	0	3250	足月儿	1978-11-17	33	1988-06-12	23	180	80	24.69	165	95	34.89	自然怀孕	顺产	无	未保胎	无	未使用药物	1	1	纯母乳喂养	24	否	1.5	8岁3月27天	8岁3月27天	8.32	8.32	2020-01-31	#REF!	注意力缺陷型	8	1	2	1	2	22	8
A11491	ZL11614	77.38		77.38	yes	男	2008-10-31	2008-10-28	AGA（适于胎龄儿）	40	3	3500	足月儿	1982-06-12	26	1985-09-23	23	171	65	44.46	166	60	43.55	自然怀孕	顺产	无	未保胎	无	未使用药物	1	1	混合喂养（母乳为主）	6	是	1.5	11岁11月6天	11岁11月6天	11.93	11.93	2020-01-31	#REF!	混合型	6	5	1	0	0	18	19
A11630	ZL11753	83	86	82	no	男	2007-10-23	2007-11-06	AGA（适于胎龄儿）	38	0	3100	足月儿	1982-03-01	25	1984-03-04	23	170	55	19.03	164	75	27.89	自然怀孕	剖宫产	无	未保胎	无	未使用药物	1	1	混合喂养（母乳为主）	6	否	0.5	12岁11月15天	12岁11月15天	12.96	12.96	2020-01-31	#REF!	注意力缺陷型	4	2	1	0	0	16	9
A14150	ZL14273	78	105	89	no	男	2013-05-16	2013-05-15	AGA（适于胎龄儿）	40	1	3500	足月儿	1985-06-28	27	1990-04-02	23	165	60	22.04	152	60	25.97	自然怀孕	剖宫产	无	未保胎	无	未使用药物	1	1	纯母乳喂养	12	是	2.5	7岁5月19天	7岁5月19天	7.47	7.47	2020-01-31	#REF!	注意力缺陷型	5	2	0	0	0	16	8
A15183	ZL15305	109	129	122	no	男	2012-12-15	2012-12-15	AGA（适于胎龄儿）	40	0	4000	足月儿	1988-08-29	24	1989-08-25	23	175	95	31.02	163	65	24.46	自然怀孕	剖宫产	其他		无		1	1					7岁11月0天	7岁11月0天	7.92	7.92	2020-01-31	#REF!	混合型	4	5	0	0	0	13	13
A16634	ZL16756	52	75	60	no	男	2014-12-30	2014-12-30	LGA（大于胎龄儿）	40	0	4500	足月儿	1991-06-05	23	1991-03-11	23	175	75	24.49	160	56	21.87	自然怀孕	顺产	无	未保胎	有		2	1					5岁11月4天	5岁11月4天	5.93	5.93	2020-01-31	#REF!	混合型	4	9	0	0	0	15	25
A17313	ZL17435	83.03		83.03	no	男	2016-02-22	2016-03-07	AGA（适于胎龄儿）	38	0	3000	足月儿	1990-02-25	26	1992-03-13	23	170			165	55	20.2	自然怀孕	顺产	其他	未保胎	无		4	2					4岁9月18天	4岁9月18天	4.8	4.8	2020-01-31	#REF!	混合型	7	8	6	4	0	20	22
A19298	ZL19420	98	140	119	no	男	2012-03-16	2012-03-25	AGA（适于胎龄儿）	38	5	3000	足月儿	1978-06-12	33	1988-11-01	23	167	65	23.31	153	44.3	18.92	自然怀孕	剖宫产	无	未保胎	无		1	1					8岁9月26天	8岁9月26天	8.82	8.82	2020-01-31	#REF!	混合型	5	4	2	0	0	16	13
A19619	ZL19741	103.12		103.12	no	男	2010-05-29	2010-05-15	AGA（适于胎龄儿）	42	0	3800	过期产儿	1983-11-26	26	1986-08-13	23	173	85	28.4	160	75	29.3	自然怀孕	剖宫产	无	未保胎	无		1	1					10岁7月17天	10岁7月17天	10.63	10.63	2020-01-31	#REF!	混合型	7	5	5	1	0	20	14
A20495	ZL20617	97.48		97.48	no	男	2011-08-06	2011-08-06	AGA（适于胎龄儿）	40	0	3800	足月儿	1984-03-14	27	1988-02-05	23	175	75	48.98	163	75	56.46	自然怀孕	顺产	无	未保胎	无		1						9岁5月23天	9岁5月23天	9.48	9.48	2020-01-31	#REF!	注意力缺陷型	5	3	0	0	0	15	12
A20585	ZL20707	124.64		124.64	no	男	2011-06-07	2011-05-31	LGA（大于胎龄儿）	41	0	6300	足月儿	1987-07-16	23	1988-02-29	23	165	51	18.73	160	54	21.09	自然怀孕	顺产	无	未保胎	无		1	1					9岁7月24天	9岁7月24天	9.65	9.65	2020-01-31	#REF!	注意力缺陷型	6	1	2	1	0	18	8
A22415	ZL22537	92.41		92.41	no	男	2016-01-04	2016-01-04	AGA（适于胎龄儿）	40	0	3600	足月儿	1992-10-14	23	1992-05-28	23	178	74	23.36	161	60	23.15	自然怀孕	剖宫产	缺氧窒息	孕中期保胎（怀孕4-6月）	无		2	1					5岁2月4天	5岁2月4天	5.18	5.18	2020-01-31	#REF!	混合型	4	5	3	0	0	13	14
A26640	ZL26762	96	93	94	no	女	2013-08-11	2013-08-11	AGA（适于胎龄儿）	40	0	3400	足月儿	1987-11-01	25	1990-07-26	23	173																		7岁8月19天	7岁8月19天	7.72	7.72	2020-01-31	#REF!	混合型	4	4	0	0	0	16	13
A26912	ZL27034	98	104	102	no	男	2011-04-01	2011-04-08	SGA（小于胎龄儿）	39	0	1950	足月儿	1986-10-23	24	1987-09-10	23	178	68	21.46	165	43	15.79	自然怀孕	剖宫产	无	未保胎	无		1	1					10岁1月4天	10岁1月4天	10.09	10.09	2020-01-31	#REF!	注意力缺陷型	8	4	1	0	0	22	11
A29955	ZL30077	107	115	113	no	男	2013-03-17	2013-04-02	AGA（适于胎龄儿）	37	5	3040	足月儿	1988-07-14	24	1989-09-20	23	173	87	29.07	158	52	20.83	自然怀孕	剖宫产	无	未保胎	无		1	1					8岁8月29天	8岁8月29天	8.75	8.75	2020-01-31	#REF!	注意力缺陷型	6	5	2	0	0	15	11
A30325	ZL30447	103	105	104	no	男	2014-07-31	2014-07-31	AGA（适于胎龄儿）	40	0	3240	足月儿	1977-11-21	36	1991-03-24	23	174	90	59.45	167	54	38.72	自然怀孕	顺产	无	未保胎	无		1	1					6岁10月24天	6岁10月24天	6.9	6.9	2020-01-31	#REF!	混合型	7	9	0	0	0	17	20
A31161	ZL31282	86.08		86.08	no	男	2015-01-16	2015-01-30	AGA（适于胎龄儿）	38	0	3400	足月儿	1982-07-18	32	1991-02-01	23							自然怀孕	顺产	无	孕早期保胎（怀孕前3月）	无		1	1					6岁5月17天	6岁5月17天	6.46	6.46	2020-01-31	#REF!	混合型	7	9	1	0	0	23	27
A31587	ZL31708	110	104	108	no	男	2008-09-19	2008-09-19	AGA（适于胎龄儿）	40	0	3650	足月儿	1984-02-06	24	1985-01-01	23																			12岁9月20天	12岁9月20天	12.8	12.8	2020-01-31	#REF!	注意力缺陷型	4	0	0	0	2	12	3
A33708	ZL33829	98.27		98.27	no	男	2013-07-23	2013-07-23	AGA（适于胎龄儿）	40	0	3500	足月儿	1990-12-01	22	1989-12-03	23	180	75	23.15	170	70	24.22	自然怀孕	顺产	无	未保胎	无		1	1					8岁0月5天	8岁0月5天	8.01	8.01	2020-01-31	#REF!	混合型	9	8	5	1	1	20	20
A33735	ZL33856	112.07		112.07	no	男	2014-12-23	2014-12-19	LGA（大于胎龄儿）	40	4	3500	足月儿	1989-10-09	25	1991-11-03	23	170			157	55	22.31	自然怀孕	剖宫产	无	未保胎,孕早期保胎（怀孕前3月）	无		1	1					6岁7月5天	6岁7月5天	6.6	6.6	2020-01-31	#REF!	混合型	4	5	0	0	0	13	14
A35414	ZL35534	102.46		102.46	no	男	2014-05-03	2014-05-03	AGA（适于胎龄儿）	40	0	3300	足月儿	1989-09-09	24	1991-05-03	23	189	100	27.99	165	55	20.2	自然怀孕	顺产	无	孕中期保胎（怀孕4-6月）			2	2					7岁3月11天	7岁3月11天	7.28	7.28	2020-01-31	#REF!	混合型	9	9	7	2	0	27	25
A36755	ZL36875	96	109	102	no	男	2016-02-22	2016-02-19	AGA（适于胎龄儿）	40	3	3100	足月儿	1991-09-25	24	1992-09-20	23	183	75	22.4	172	54	18.25	自然怀孕	顺产	无	未保胎	无		1	1					5岁6月5天	5岁6月5天	5.51	5.51	2020-01-31	#REF!	多动冲动型	1	4	1	0	0	10	14
A37339	ZL37459	91.4		91.4	no	男	2016-10-31	2016-11-06	AGA（适于胎龄儿）	39	1	2980	足月儿	1993-10-22	23	1993-07-19	23	172	60	20.28	162	50	19.05	自然怀孕	剖宫产	其他	未保胎	无		1	1					4岁10月3天	4岁10月3天	4.84	4.84	2020-01-31	#REF!	混合型	9	7	2	0	0	21	17
A44574	ZL44692	94	108	102	no	男	2008-07-12	2008-07-06	AGA（适于胎龄儿）	40	6	3550	足月儿	1983-01-26	25	1984-11-24	23	175	80	52.24	170	60	41.52	自然怀孕	顺产	无	未保胎	无		1	1					13岁4月25天	13岁4月25天	13.4	13.4	2020-01-31	#REF!	注意力缺陷型	6	2	0	0	0	17	10
A44804	ZL44922	88	110	98	no	男	2014-08-19	2014-08-25	AGA（适于胎龄儿）	39	1	3500	足月儿	1991-01-13	23	1991-02-16	23	175	66	21.55	164	52	19.33	自然怀孕	顺产	无	未保胎	无		2	1					7岁3月22天	7岁3月22天	7.31	7.31	2020-01-31	#REF!	混合型	5	7	1	0	0	16	18
A45368	ZL45486	113	105	111	no	男	2013-06-15	2013-06-09	AGA（适于胎龄儿）	40	6	3580	足月儿	1989-07-23	23	1990-03-14	23	170	80	27.68	159	51	20.17	自然怀孕	剖宫产	无	未保胎	无		2	1					8岁6月3天	8岁6月3天	8.51	8.51	2020-01-31	#REF!	混合型	6	5	2	0	0	17	16
A46916	ZL47034	101.29		101.29	no	男	2008-04-30	2008-04-30	SGA（小于胎龄儿）	40	0	2800	足月儿	1984-08-05	23	1984-09-23	23	182	85	25.66	162	47	17.91	自然怀孕	剖宫产	无	未保胎	无		3	1					13岁8月12天	13岁8月12天	13.7	13.7	2020-01-31	#REF!	注意力缺陷型	2	1	0	1	5	11	3
A46965	ZL47083	52	46	46	no	女	2014-02-11	2014-02-20	AGA（适于胎龄儿）	38	5	3160	足月儿	1989-08-26	24	1990-06-17	23	180	75	23.15	160	70	27.34	自然怀孕	剖宫产	无	未保胎	无		2	1					8岁0月17天	8岁0月17天	8.05	8.05	2020-01-31	#REF!	混合型	9	7	4	0	0	22	15
A50007	ZL50125	103	104	103	no	男	2014-08-30	2014-08-16	SGA（小于胎龄儿）	42	0	1850	过期产儿	1988-05-20	26	1990-12-23	23	175	65	21.22	160	52	20.31	自然怀孕	剖宫产	无	孕早期保胎（怀孕前3月）	无		1	1					7岁6月3天	7岁6月3天	7.51	7.51	2020-01-31	#REF!	混合型	9	9	6	0	0	21	25
A7450	ZL7577	82.25		82.25	no	男	2008-12-23	2008-12-13	AGA（适于胎龄儿）	41	3	4000	足月儿	1983-10-08	25	1985-04-20	23	174	70	23.12	161	60	23.15	自然怀孕	剖宫产	无	未保胎	无	未使用药物	1	1	混合喂养（母乳为主）	9	否	2.5	12岁1月13天	12岁1月13天	12.12	12.12	2020-01-31	#REF!	注意力缺陷型	0	0	0	0	0	4	1
A8341	ZL8468	101	101	102	no	男	2010-11-02	2010-10-27	AGA（适于胎龄儿）	40	6	3250	足月儿	1983-06-20	27	1986-11-26	23	166	50	18.14	156	50	20.55	自然怀孕	顺产	无	孕早期保胎（怀孕前3月）	无	未使用药物	2	1	混合喂养（母乳为主）	1	是	0.5	10岁9月19天	10岁9月19天	10.8	10.8	2020-01-31	#REF!	注意力缺陷型	5	1	0	1	1	17	6
A8856	ZL8983	95	100	97	no	男	2014-06-25	2014-06-27	AGA（适于胎龄儿）	39	5	3300	足月儿	1990-03-08	24	1990-10-26	23	181	90	27.47	167	53	19	自然怀孕	顺产	无	未保胎	无	未使用药物	1	1	混合喂养（配方奶为主）	2	是	0.5	6岁2月9天	6岁2月9天	6.19	6.19	2020-01-31	#REF!	注意力缺陷型	3	2	0	0	0	12	9
A9787	ZL9910	106	101	103	no	男	2011-12-14	2012-01-11	SGA（小于胎龄儿）	36	0	600	早产儿	1977-02-07	34	1988-08-11	23	181	70	21.37	155	43	17.9	自然怀孕	剖宫产	无	孕早期保胎（怀孕前3月）	无	其他	1	1	混合喂养（配方奶为主）	1	否	0.5	8岁9月7天	8岁9月7天	8.77	8.77	2020-01-31	#REF!	混合型	1	4	2	0	1	10	12
A10882	ZL11005	104	123	115	no	男	2008-07-13	2008-07-27	AGA（适于胎龄儿）	38	0	3450	足月儿	1984-09-30	23	1983-08-06	24	176	120	38.74	163	60	45.17	自然怀孕	顺产	无	孕早期保胎（怀孕前3月）	无	未使用药物	1	1	混合喂养（母乳为主）	3	是	1	12岁3月25天	12岁3月25天	12.32	12.32	2020-01-31	#REF!	注意力缺陷型	6	1	0	0	0	16	4
A11065	ZL11188	92	113	102	yes	男	2009-05-30	2009-05-23	AGA（适于胎龄儿）	41	0	3700	足月儿	1983-12-10	25	1984-07-14	24	172	75	25.35	160	60	23.44	自然怀孕	顺产	无	未保胎	无	未使用药物	1	1	纯母乳喂养	12	是	3.5	11岁3月29天	11岁3月29天	11.33	11.33	2020-01-31	#REF!	混合型	9	6	5	1	1	26	19
A11371	ZL11494	95	89	91	no	女	2011-03-31	2011-04-07	AGA（适于胎龄儿）	39	0	3300	足月儿	1972-11-26	38	1986-10-25	24	160	57	22.27	160	52	20.31	自然怀孕	剖宫产	无	未保胎	无	其他	1	1	人工喂养	0	是	1	9岁6月5天	9岁6月5天	9.51	9.51	2020-01-31	#REF!	注意力缺陷型	7	1	0	0	0	20	9
A11847	ZL11970	102	119	111	no	男	2013-02-16	2013-02-19	AGA（适于胎龄儿）	39	4	3900	足月儿	1985-05-25	27	1988-12-11	24	173		20.05	156		19.31	自然怀孕	剖宫产	无	未保胎	无	未使用药物	2	1	混合喂养（母乳为主）	3	否	1	7岁7月20天	7岁7月20天	7.64	7.64	2020-01-31	#REF!	混合型	5	7	6	2	0	16	20
A12009	ZL12132	86	98	90	no	男	2012-08-05	2012-08-23	LGA（大于胎龄儿）	37	3	3800	足月儿	1989-05-12	23	1987-12-10	24	170	75	51.9	160	50	39.06	自然怀孕	顺产	其他	未保胎	无	未使用药物	1	1	人工喂养	0	否	0	8岁2月5天	8岁2月5天	8.18	8.18	2020-01-31	#REF!	注意力缺陷型	8	1	0	0	1	25	10
A12186	ZL12309	86.38		86.38	no	男	2012-02-13	2012-02-20	AGA（适于胎龄儿）	39	0	3800	足月儿	1987-02-03	25	1987-09-13	24	175	70	22.86	155	63	26.22	自然怀孕	顺产	无	未保胎	无	未使用药物	1	1	混合喂养（母乳为主）	8	否	1.5	8岁8月0天	8岁8月0天	8.67	8.67	2020-01-31	#REF!	注意力缺陷型	3	2	0	0	0	13	9
A12588	ZL12711	74.91		74.91	no	男	2012-08-30	2012-09-06	AGA（适于胎龄儿）	39	0	3580	足月儿	1982-09-29	29	1988-02-17	24	174	70	23.12	154	60	25.3	自然怀孕	顺产	无	未保胎	无	未使用药物	1	1	混合喂养（母乳为主）	12	是	1	8岁1月18天	8岁1月18天	8.13	8.13	2020-01-31	#REF!	混合型	3	2	0	0	0	11	10
A13248	ZL13371	80	119	96	no	女	2013-04-21	2013-05-09	AGA（适于胎龄儿）	37	3	2500	足月儿	1988-02-14	25	1989-03-28	24	170	65	22.49	160	45	17.58	自然怀孕	剖宫产	无	未保胎	无	未使用药物	3	1	人工喂养	0	是	1	7岁11月1天	7岁11月1天	7.92	7.92	2020-01-31	#REF!	注意力缺陷型	2	2	0	0	0	11	8
A13278	ZL13401	91	74	80	no	男	2014-02-12	2014-02-16	SGA（小于胎龄儿）	39	3	2470	足月儿	1981-09-24	32	1989-05-05	24	168	73	25.86	165	49	18	自然怀孕	顺产	无	未保胎	无	未使用药物	1	1	混合喂养（配方奶为主）	0	是	2	6岁8月14天	6岁8月14天	6.71	6.71	2020-01-31	#REF!	混合型	1	0	0	0	0	10	8
A13297	ZL13420	108.23		108.23	no	男	2012-06-25	2012-07-16	AGA（适于胎龄儿）	37	0	3000	足月儿	1984-04-20	28	1988-06-25	24	178	65	205150.86	160	55	214843.75	自然怀孕	剖宫产	无	未保胎	无	未使用药物	1	1	混合喂养（母乳为主）	2	是	1	8岁4月1天	8岁4月1天	8.34	8.34	2020-01-31	#REF!	注意力缺陷型	4	3	2	0	0	14	12
A13776	ZL13899	100	104	102	no	女	2008-02-22	2008-02-29	AGA（适于胎龄儿）	39	0	3520	足月儿	1979-11-04	28	1983-07-10	24	180	100	30.86	156	63	25.89	自然怀孕	顺产	无	未保胎	无	未使用药物	1	1	纯母乳喂养	8	否	2.5	12岁8月8天	12岁8月8天	12.69	12.69	2020-01-31	#REF!	注意力缺陷型	3	1	0	0	0	11	5
A14125	ZL14248	102	113	108	no	男	2013-02-05	2013-02-19	AGA（适于胎龄儿）	38	0	3400	足月儿	1987-08-30	25	1988-10-16	24	178	70	22.09	163	50	18.82	自然怀孕	顺产	无	未保胎	无	未使用药物	1	1	纯母乳喂养	7	是	1.5	7岁8月26天	7岁8月26天	7.74	7.74	2020-01-31	#REF!	注意力缺陷型	7	1	0	0	0	19	7
A14137	ZL14260	87	93	89	no	男	2012-12-03	2012-12-10	AGA（适于胎龄儿）	39	0	2935	足月儿	1981-11-15	31	1988-01-16	24	172	79	26.7	170	58	20.07	自然怀孕	顺产	无	孕早期保胎（怀孕前3月）,孕中期保胎（怀孕4-6月）	无	其他	1	1	混合喂养（母乳为主）	10	否	2	7岁11月0天	7岁11月0天	7.92	7.92	2020-01-31	#REF!	混合型	4	6	4	0	0	14	15
A14442	ZL14565	89.23		89.23	no	男	2013-01-10	2013-01-03	LGA（大于胎龄儿）	41	0	6720	足月儿	1983-05-20	29	1988-11-26	24	176	80	25.83	163	54	20.32	自然怀孕	顺产	无	未保胎	无	未使用药物	1	1	混合喂养（配方奶为主）	1	是	0.5	7岁9月27天	7岁9月27天	7.82	7.82	2020-01-31	#REF!	混合型	8	4	4	0	0	23	13
A14709	ZL14832	117.08		117.08	no	男	2010-04-30	2010-04-30	AGA（适于胎龄儿）	40	0	3020	足月儿	1984-05-22	25	1985-05-22	24	178	80	25.25	158	54	21.63	自然怀孕	剖宫产	无	孕早期保胎（怀孕前3月）	无	未使用药物	1	1	人工喂养	0	是	0.5	10岁6月10天	10岁6月10天	10.53	10.53	2020-01-31	#REF!	注意力缺陷型	4	2	1	0	0	13	11
A14825	ZL14948	70.77		70.77	no	男	2017-08-13	2017-08-13	SGA（小于胎龄儿）	40	0	4000	足月儿	1995-02-02	22	1992-12-10	24	175	100	32.65	170	50	17.3	自然怀孕	顺产	无	孕早期保胎（怀孕前3月）	无	未使用药物	1	1	人工喂养	1	是	0	4岁	4岁	4	4	2020-01-31	#REF!	多动冲动型	0	3	0	0	0	3	8
A15003	ZL15125	80	95	85	no	男	2012-04-07	2012-04-07	AGA（适于胎龄儿）	40	0	3600	足月儿	1988-10-23	23	1987-08-10	24	180	60	18.52	157	55	22.31	自然怀孕	顺产	缺氧窒息	未保胎	无	未使用药物	1	1	纯母乳喂养	15	否	1	8岁7月6天	8岁7月6天	8.6	8.6	2020-01-31	#REF!	混合型	9	6	3	0	1	25	18
A15786	ZL15908	122.41		122.41	no	男	2014-06-23	2014-06-23	AGA（适于胎龄儿）	40	0	3000	足月儿	1987-10-17	26	1990-01-06	24	170	70	24.22	167	58	20.8	自然怀孕	顺产	无	未保胎	无		1	1					6岁4月28天	6岁4月28天	6.41	6.41	2020-01-31	#REF!	混合型	2	2	0	0	0	9	11
A16785	ZL16907	107.54		107.54	no	男	2014-04-30	2014-04-30	AGA（适于胎龄儿）	40	0	3200	足月儿	1983-08-07	30	1990-02-13	24	176	70	22.6	163	55	20.7	自然怀孕	顺产	无	未保胎	无		2	1					6岁7月4天	6岁7月4天	6.59	6.59	2020-01-31	#REF!	注意力缺陷型	9	5	0	0	0	18	11
A17026	ZL17148	91	90	89	no	男	2014-07-05	2014-08-16	AGA（适于胎龄儿）	34	0	2250	早产儿	1988-12-10	25	1989-08-24	24	180	75	23.15	160	60	23.44	自然怀孕	顺产	缺氧窒息	未保胎	无		1	1					6岁5月3天	6岁5月3天	6.42	6.42	2020-01-31	#REF!	混合型	7	6	7	0	0	18	17
A17777	ZL17899	70	80	72	no	男	2012-01-18	2012-01-18	LGA（大于胎龄儿）	40	0	5500	足月儿	1983-05-08	28	1987-07-28	24	182	240	72.46	167	90	64.54	自然怀孕	剖宫产	无	未保胎	无		1	1					8岁11月0天	8岁11月0天	8.92	8.92	2020-01-31	#REF!	混合型	9	9	7	1	0	26	24
A18414	ZL18536	107	95	102	no	男	2012-12-18	2012-12-18	AGA（适于胎龄儿）	40	0	3750	足月儿	1987-09-22	25	1988-06-14	24																			8岁0月8天	8岁0月8天	8.02	8.02	2020-01-31	#REF!	混合型	2	1	0	0	0	11	9
A20174	ZL20296	77	82	76	no	女	2011-06-28	2011-06-28	AGA（适于胎龄儿）	40	0	4000	足月儿	1986-08-26	24	1987-06-04	24	185	100	29.22	165	80	29.38	自然怀孕	剖宫产	无										9岁6月24天	9岁6月24天	9.57	9.57	2020-01-31	#REF!	混合型	4	7	5	0	0	15	19
A20248	ZL20370	92	92	90	no	男	2014-05-09	2014-05-23	AGA（适于胎龄儿）	38	0	2740	足月儿	1987-02-25	27	1989-11-12	24	175	65	21.22	160	55	21.48	自然怀孕	剖宫产	其他	孕后期保胎（怀孕7月后）	有		1	1					6岁8月16天	6岁8月16天	6.71	6.71	2020-01-31	#REF!	多动冲动型	3	5	3	2	0	12	14
A21632	ZL21754	94	112	103	no	男	2011-07-22	2011-07-15	AGA（适于胎龄儿）	41	0	4300	足月儿	1982-10-09	28	1986-10-23	24	169	75	52.52	162	60	45.72	自然怀孕	剖宫产	无	未保胎	无								9岁7月2天	9岁7月2天	9.59	9.59	2020-01-31	#REF!	混合型	1	3	0	0	0	10	10
A22254	ZL22376	102.04		102.04	no	男	2013-07-16	2013-07-16	SGA（小于胎龄儿）	40	0	2780	足月儿	1984-09-09	28	1988-07-29	24	175	80	26.12	160	65	25.39	自然怀孕	顺产	无	孕早期保胎（怀孕前3月）	无		1	1					7岁7月20天	7岁7月20天	7.64	7.64	2020-01-31	#REF!	混合型	5	5	1	0	0	16	15
A23455	ZL23577	86	75	77	no	女	2011-04-15	2011-04-15	AGA（适于胎龄儿）	40	0	4000	足月儿	1985-10-09	25	1986-06-22	24	180	85	26.23	165	80	29.38	自然怀孕	剖宫产	无	未保胎	无								9岁11月11天	9岁11月11天	9.95	9.95	2020-01-31	#REF!	注意力缺陷型	1	0	1	0	0	10	5
A24205	ZL24327	100	112	105	no	男	2013-07-04	2013-07-10	LGA（大于胎龄儿）	39	1	4080	足月儿	1985-08-16	27	1989-06-20	24	178	90	28.41	164	52	19.33	自然怀孕	剖宫产	无	未保胎	无		1	1					7岁8月26天	7岁8月26天	7.74	7.74	2020-01-31	#REF!	混合型	6	6	0	0	0	16	17
A25068	ZL25190	87	80	82	no	男	2014-03-29	2014-03-29	LGA（大于胎龄儿）	40	0	9000	足月儿	1975-08-04	38	1990-02-04	24	175	65	21.22	160	55	21.48	自然怀孕	剖宫产	无	孕早期保胎（怀孕前3月）	无		2	1					7岁0月11天	7岁0月11天	7.03	7.03	2020-01-31	#REF!	注意力缺陷型	5	1	0	0	0	15	8
A25229	ZL25351	97.76		97.76	no	男	2016-06-21	2016-06-21	AGA（适于胎龄儿）	40	0	3000	足月儿	1986-01-21	30	1991-10-12	24	170	65	449826.99	158	55	220317.26	自然怀孕	剖宫产	无		无		2	1					4岁9月21天	4岁9月21天	4.81	4.81	2020-01-31	#REF!	混合型	9	7	3	1	0	27	18
A26217	ZL26339	68	70	66	no	男	2008-09-25	2008-09-25	AGA（适于胎龄儿）	40	0	3250	足月儿	1981-01-06	27	1983-12-24	24	176	80	25.83	171	75	25.65	自然怀孕	剖宫产	无	未保胎	无		2	1					12岁6月29天	12岁6月29天	12.58	12.58	2020-01-31	#REF!	注意力缺陷型	9	1	1	0	0	18	8
A28085	ZL28207	104	95	101	no	男	2015-01-03	2015-01-03	AGA（适于胎龄儿）	40	0	3000	足月儿	1987-09-03	27	1990-03-11	24																			6岁4月18天	6岁4月18天	6.38	6.38	2020-01-31	#REF!	注意力缺陷型	5	4	0	0	0	15	12
A28554	ZL28676	83	100	89	no	男	2014-07-03	2014-07-03	AGA（适于胎龄儿）	40	0	3300	足月儿	1986-06-25	28	1990-02-06	24																			6岁10月25天	6岁10月25天	6.9	6.9	2020-01-31	#REF!	混合型	0	0	0	0	0	9	7
A30482	ZL30604	107	126	119	no	男	2013-02-22	2013-02-22	AGA（适于胎龄儿）	40	0	3900	足月儿	1985-06-14	27	1988-10-16	24	187	96	27.45	166	82	29.76	人工授孕/试管婴儿	剖宫产	无	孕早期保胎（怀孕前3月）,孕后期保胎（怀孕7月后）	有		1	1					8岁4月3天	8岁4月3天	8.34	8.34	2020-01-31	#REF!	多动冲动型	4	4	4	0	1	12	14
A31030	ZL31151	86	95	89	no	男	2013-12-10	2013-12-08	AGA（适于胎龄儿）	40	2	3600	足月儿	1978-06-19	35	1989-11-18	24	176	60	19.37	167	55	19.72	自然怀孕	顺产	无	未保胎	无		1						7岁6月22天	7岁6月22天	7.56	7.56	2020-01-31	#REF!	注意力缺陷型	6	1	0	1	0	16	7
A31770	ZL31891	102	95	99	no	男	2010-11-06	2010-11-06	AGA（适于胎龄儿）	40	0	3600	足月儿	1986-07-29	24	1986-10-22	24							自然怀孕	顺产	无	未保胎	无		1	1					10岁8月2天	10岁8月2天	10.67	10.67	2020-01-31	#REF!	注意力缺陷型	4	3	1	1	0	16	11
A32110	ZL32231	98.76		98.76	yes	男	2010-03-28	2010-03-30	AGA（适于胎龄儿）	39	5	3498	足月儿	1977-12-04	32	1986-01-27	24	172	68	45.97	163	92	34.63	自然怀孕	顺产	无	孕后期保胎（怀孕7月后）	无		1	1					11岁3月15天	11岁3月15天	11.29	11.29	2020-01-31	#REF!	注意力缺陷型	4	1	2	0	0	11	7
A35191	ZL35311	111	102	108	no	男	2016-04-01	2016-04-16	LGA（大于胎龄儿）	37	6	6600	足月儿	1990-04-03	26	1991-10-14	24	172	75	25.35	165	47	17.26	自然怀孕	顺产	无	未保胎	无		1	1					5岁4月11天	5岁4月11天	5.36	5.36	2020-01-31	#REF!	混合型	5	8	2	0	0	14	23
A35267	ZL35387	80	93	84	no	女	2015-07-28	2015-08-22	AGA（适于胎龄儿）	36	3	2525	早产儿	1984-10-26	30	1990-11-01	24	173	80	26.73	160	60	23.44	自然怀孕	顺产	无	未保胎	无		1	1					6岁0月15天	6岁0月15天	6.04	6.04	2020-01-31	#REF!	混合型	3	2	2	0	2	12	10
A35834	ZL35954	72.61		72.61	no	男	2014-09-18	2014-09-25	SGA（小于胎龄儿）	39	0	3250	足月儿	1987-11-15	26	1989-12-12	24	178	75	23.67	156	55	22.6	自然怀孕	剖宫产	无	未保胎	无		1	1					6岁11月1天	6岁11月1天	6.92	6.92	2020-01-31	#REF!	注意力缺陷型	4	3	3	0	1	13	11
A38448	ZL38568	94	125	108	no	男	2011-07-13	2011-07-13	LGA（大于胎龄儿）	40	0	7500	足月儿	1981-04-14	30	1986-09-15	24	170	65	22.49	155	53	22.06	自然怀孕	顺产	无	未保胎	无		1	1					10岁2月5天	10岁2月5天	10.18	10.18	2020-01-31	#REF!	混合型	9	6	7	2	7	27	18
A40966	ZL41084	73	82	74	no	男	2015-06-30	2015-06-30	AGA（适于胎龄儿）	40	0	3600	足月儿	1990-10-12	24	1991-06-24	24	165	60	22.04	158	51	20.43	自然怀孕	顺产	无	未保胎	无								6岁3月20天	6岁3月20天	6.3	6.3	2020-01-31	#REF!	注意力缺陷型	6	0	0	0	2	20	6
A47610	ZL47728	94.72		94.72	no	男	2015-02-08	2015-02-03	AGA（适于胎龄儿）	40	5	3275	足月儿	1989-07-21	25	1990-06-21	24	187	110	31.46	162.5	50	18.93	自然怀孕	顺产	无	孕早期保胎（怀孕前3月）	无		1	1					6岁11月14天	6岁11月14天	6.96	6.96	2020-01-31	#REF!	混合型	5	5	6	0	0	14	14
A47652	ZL47770	98	127	113	no	男	2013-08-22	2013-08-29	AGA（适于胎龄儿）	39	0	3000	足月儿	1986-11-16	26	1988-11-06	24	180	70	21.6	165	75	27.55	自然怀孕	剖宫产	无	孕早期保胎（怀孕前3月）	无		1	1					8岁5月0天	8岁5月0天	8.42	8.42	2020-01-31	#REF!	混合型	5	7	3	1	0	18	18
A48098	ZL48216	84	90	86	no	男	2012-07-19	2012-07-26	AGA（适于胎龄儿）	39	0	3700	足月儿	1988-12-13	23	1988-07-15	24	186	70	20.23	172	65	21.97	自然怀孕	剖宫产	无	未保胎	无		1	1					9岁6月10天	9岁6月10天	9.53	9.53	2020-01-31	#REF!	注意力缺陷型	4	3	1	0	0	13	12
A50171	ZL50289	104	126	117	no	男	2013-05-05	2013-05-12	AGA（适于胎龄儿）	39	0	3350	足月儿	1986-12-04	26	1988-11-19	24	173	74	24.73	163	55	20.7	自然怀孕	顺产	无	未保胎	无		2	2					8岁9月30天	8岁9月30天	8.83	8.83	2020-01-31	#REF!	注意力缺陷型	2	1	0	0	0	10	5
A52812	ZL52930	91	100	94	no	女	2016-02-19	2016-02-19	AGA（适于胎龄儿）	40	0	3720	足月儿	1991-10-21	24	1991-05-26	24	178	74	23.36	165	50	18.37	自然怀孕	剖宫产	无	孕早期保胎（怀孕前3月）	无		2	2					6岁4月11天	6岁4月11天	6.36	6.36	2020-01-31	#REF!	混合型	4	4	0	0	0	12	12
A62745	ZL62858	89.74		89.74	no	男	2014-03-20	2014-03-20	AGA（适于胎龄儿）	40	0	3800	足月儿	1988-09-13	25	1989-04-18	24	180	90	27.78	170	60	20.76	自然怀孕	剖宫产	无	孕早期保胎（怀孕前3月）	无		1	1					8岁7月14天	8岁7月14天	8.62	8.62	2020-01-31	#REF!	注意力缺陷型	9	2	1	1	7	26	12
A63262	ZL63375	90.46		90.46	no	男	2017-03-08	2017-03-08	AGA（适于胎龄儿）	40	0	3000	足月儿	1993-05-12	23	1992-04-23	24	174	80	26.42	156	75	30.82	自然怀孕	顺产	无	未保胎	无		1	1					5岁8月3天	5岁8月3天	5.67	5.67	2020-01-31	#REF!	混合型	8	6	5	0	4	23	18
A6464	ZL6591	83.4		83.4	no	男	2010-08-17	2010-08-31	SGA（小于胎龄儿）	38	0	3200	足月儿	1982-10-14	27	1985-09-07	24	173	67	22.39	154	44	18.55	自然怀孕	剖宫产	无	未保胎	无	调节甲状腺激素类药物	1	1	混合喂养（母乳为主）	6	否	2	10岁2月10天	10岁2月10天	10.19	10.19	2020-01-31	#REF!	混合型	9	5	8	5	1	24	15
A7956	ZL8083	114.61		114.61	no	男	2011-06-16	2011-06-23	AGA（适于胎龄儿）	39	0	2800	足月儿	1986-11-22	24	1987-01-27	24	165	63	23.14	163	58	21.83	自然怀孕	顺产	无	未保胎	无	调节甲状腺激素类药物	1	1	纯母乳喂养	9	否	0	9岁8月8天	9岁8月8天	9.69	9.69	2020-01-31	#REF!	注意力缺陷型	5	2	0	0	0	15	10
A9572	ZL9695	80	67	70	no	男	2014-07-24	2014-07-24	AGA（适于胎龄儿）	40	0	3710	足月儿	1987-01-01	27	1989-12-27	24	175	72	23.51	158	57	22.83	自然怀孕	顺产	无	未保胎	有	未使用药物	1	1	纯母乳喂养	8	否	1	6岁1月18天	6岁1月18天	6.13	6.13	2020-01-31	#REF!	注意力缺陷型	7	2	3	0	2	20	9
A10019	ZL10142	91	93	90	no	男	2013-07-22	2013-07-21	SGA（小于胎龄儿）	40	1	3700	足月儿	1987-05-27	26	1988-07-15	25	173	69	46.11	164	58	43.13	自然怀孕	顺产	无	未保胎	无	未使用药物	2	1	混合喂养（配方奶为主）	3	否	0.5	7岁5月15天	7岁5月15天	7.46	7.46	2020-01-31	#REF!	注意力缺陷型	5	4	0	0	0	15	12
A10379	ZL10502	89	100	93	no	男	2016-05-06	2016-05-06	AGA（适于胎龄儿）	40	0	3250	足月儿	1989-06-16	26	1991-03-10	25	174	85	28.08	160	50	19.53	自然怀孕	顺产	无	未保胎	无	未使用药物	2	2	混合喂养（母乳为主）	4	否	1.5	4岁4月15天	4岁4月15天	4.37	4.37	2020-01-31	#REF!	混合型	2	1	0	0	0	7	6
A10424	ZL10547	96	92	94	no	男	2014-08-18	2014-08-11	AGA（适于胎龄儿）	41	0	3250	足月儿	1986-01-06	28	1989-06-21	25	176	72	23.24	160	58	22.66	自然怀孕	顺产	无	未保胎	无	未使用药物	1	1	混合喂养（母乳为主）	5	是	3	6岁1月3天	6岁1月3天	6.09	6.09	2020-01-31	#REF!	注意力缺陷型	5	3	1	0	0	14	11
A10747	ZL10870	92	113	102	no	男	2012-09-25	2012-10-02	SGA（小于胎龄儿）	39	0	4000	足月儿	1985-07-03	28	1987-11-03	25	178	80	25.25	165	60	22.04	自然怀孕	剖宫产	无	未保胎	无	未使用药物	1	1	混合喂养（母乳为主）	10	否	1.5	7岁11月29天	7岁11月29天	8	8	2020-01-31	#REF!	注意力缺陷型	5	3	1	0	0	16	11
A10802	ZL10925	87	112	98	no	男	2010-10-30	2010-11-13	SGA（小于胎龄儿）	38	0	1625	足月儿	1980-08-20	30	1985-04-24	25	178	69.5	43.87	158	64	51.27	自然怀孕	顺产	无	未保胎	无	未使用药物	1	1	混合喂养（配方奶为主）	3	否	0.5	9岁10月26天	9岁10月26天	9.9	9.9	2020-01-31	#REF!	混合型	3	3	0	0	0	12	11
A10960	ZL11083	89	80	83	no	男	2010-07-09	2010-07-28	AGA（适于胎龄儿）	37	2	2930	足月儿	1980-11-21	29	1984-08-14	25	172	60	20.28	165.5	65	23.73	自然怀孕	剖宫产	无	未保胎	无	未使用药物	2	1	人工喂养	1	是	8	10岁2月19天	10岁2月19天	10.22	10.22	2020-01-31	#REF!	注意力缺陷型	5	1	0	0	0	16	5
A10991	ZL11114	84	104	94	no	男	2015-08-06	2015-08-06	AGA（适于胎龄儿）	40	0	3650	足月儿	1987-11-28	27	1990-01-01	25	175	75	24.49	165	60	22.04	自然怀孕	剖宫产	其他	未保胎	有	未使用药物	2	3	混合喂养（母乳为主）	6	否	1.5	5岁1月22天	5岁1月22天	5.14	5.14	2020-01-31	#REF!	混合型	6	7	1	1	0	20	19
A10999	ZL11122	115.92		115.92	no	男	2013-08-05	2013-08-12	AGA（适于胎龄儿）	39	0	3510	足月儿	1986-09-04	26	1988-07-14	25	175	70	22.86	160	60	23.44	自然怀孕	剖宫产	无	未保胎	无	未使用药物	2	2	纯母乳喂养	11	否	0	7岁1月23天	7岁1月23天	7.15	7.15	2020-01-31	#REF!	混合型	8	8	3	0	0	23	24
A11162	ZL11285	80	73	73	no	男	2010-11-02	2010-11-16	SGA（小于胎龄儿）	38	0	3250	足月儿	1986-01-01	24	1985-10-17	25	173	60	20.05	163	52	19.57	自然怀孕	剖宫产	无	孕早期保胎（怀孕前3月）	无	未使用药物	1	1	混合喂养（母乳为主）	6	是	1.5	9岁10月27天	9岁10月27天	9.91	9.91	2020-01-31	#REF!	注意力缺陷型	8	0	0	0	0	19	6
A11503	ZL11626	56	104	76	no	女	2013-10-18	2013-10-16	AGA（适于胎龄儿）	40	2	3000	足月儿	1986-07-23	27	1988-03-27	25	170	70	24.22	155	60	24.97	自然怀孕	剖宫产	无	孕后期保胎（怀孕7月后）	无	未使用药物	1	1	纯母乳喂养	10	是	2	6岁11月19天	6岁11月19天	6.97	6.97	2020-01-31	#REF!	注意力缺陷型	8	2	0	0	0	21	9
A11901	ZL12024	98.67		98.67	no	男	2014-08-31	2014-08-24	SGA（小于胎龄儿）	41	0	2050	足月儿	1989-02-02	25	1989-06-05	25	174	75	49.54	162	59	44.96	自然怀孕	顺产	无	孕早期保胎（怀孕前3月）	无	未使用药物	1	1	纯母乳喂养	12	否	1	6岁1月9天	6岁1月9天	6.11	6.11	2020-01-31	#REF!	混合型	6	8	2	0	0	17	21
A13098	ZL13221	102.34		102.34	no	男	2016-11-02	2016-08-24	SGA（小于胎龄儿）	50	0	4000	过期产儿	1992-01-15	24	1991-02-28	25	175	70	22.86	158	65	26.04	自然怀孕	剖宫产	无	孕早期保胎（怀孕前3月）	无	未使用药物	1	1	纯母乳喂养	12	否	1	4岁	4岁	4	4	2020-01-31	#REF!	多动冲动型	2	6	1	0	0	11	13
A13110	ZL13233	90.34		90.34	no	男	2011-03-30	2011-04-20	SGA（小于胎龄儿）	37	0	3000	足月儿	1984-07-14	26	1986-02-11	25	175	75	24.49	154	45	18.97	自然怀孕	剖宫产	无	未保胎	无	未使用药物	1	1	混合喂养（配方奶为主）	6	是	1	9岁6月24天	9岁6月24天	9.57	9.57	2020-01-31	#REF!	混合型	5	5	1	0	0	15	15
A13216	ZL13339	107	95	102	no	女	2011-12-16	2011-12-16	AGA（适于胎龄儿）	40	0	3300	足月儿	1986-04-01	25	1986-05-10	25	185	85	24.84	160	65	25.39	自然怀孕	剖宫产	无	未保胎	无	未使用药物	1	1	纯母乳喂养	11	否	1.5	8岁10月7天	8岁10月7天	8.85	8.85	2020-01-31	#REF!	注意力缺陷型	6	2	0	0	0	19	9
A13553	ZL13676	93	106	100	no	男	2013-11-01	2013-11-01	AGA（适于胎龄儿）	40	0	3400	足月儿	1988-06-15	25	1988-01-06	25	172	91	30.76	161	56	21.6	自然怀孕	剖宫产	无	未保胎	无	未使用药物	1	1	纯母乳喂养	15	否	0.5	6岁11月27天	6岁11月27天	6.99	6.99	2020-01-31	#REF!	多动冲动型	3	5	0	0	0	12	16
A13594	ZL13717	80.81		80.81	no	男	2013-06-22	2013-07-10	LGA（大于胎龄儿）	37	3	3000	足月儿	1988-11-11	24	1987-10-27	25	176	70	22.6	167	60	21.51	自然怀孕	顺产	无	未保胎	无	未使用药物	1	1	混合喂养（配方奶为主）	3	否	1.5	7岁4月6天	7岁4月6天	7.35	7.35	2020-01-31	#REF!	多动冲动型	2	5	1	1	0	11	17
A13755	ZL13878	69.62		69.62	no	男	2010-10-15	2010-10-14	SGA（小于胎龄儿）	40	1	350	足月儿	1982-06-15	28	1985-05-02	25	172	85	28.73	165	55	20.2	自然怀孕	顺产	缺氧窒息	未保胎	无	未使用药物	3	1	混合喂养（母乳为主）	4	是	1	10岁0月16天	10岁0月16天	10.04	10.04	2020-01-31	#REF!	注意力缺陷型	6	2	2	0	0	15	9
A14437	ZL14560	101	126	114	no	男	2013-07-21	2013-07-28	AGA（适于胎龄儿）	39	0	3450	足月儿	1986-11-05	26	1988-02-13	25	172	70	23.66	153	51	21.79	自然怀孕	剖宫产	无	孕中期保胎（怀孕4-6月）	无	未使用药物	1	1	混合喂养（母乳为主）	10	否	1.5	7岁3月16天	7岁3月16天	7.29	7.29	2020-01-31	#REF!	混合型	3	2	0	0	0	11	9
A15002	ZL15124	91	78	82	no	男	2012-12-19	2012-12-25	SGA（小于胎龄儿）	39	1	3255	足月儿	1987-11-08	25	1987-09-15	25	167	58	20.8	162	60	22.86	自然怀孕	顺产	无	孕中期保胎（怀孕4-6月）	无	未使用药物	2	2	混合喂养（配方奶为主）	2	否	1	7岁10月25天	7岁10月25天	7.9	7.9	2020-01-31	#REF!	注意力缺陷型	6	0	3	0	0	18	7
A15474	ZL15596	91.96		91.96	no	男	2012-08-21	2012-08-22	AGA（适于胎龄儿）	39	6	3400	足月儿	1985-10-11	26	1986-09-21	25	171.5	65	22.1	162.5	53	20.07	自然怀孕	剖宫产	无		有		1	1					8岁2月28天	8岁2月28天	8.24	8.24	2020-01-31	#REF!	注意力缺陷型	2	0	0	0	0	8	4
A15627	ZL15749	100	70	84	no	男	2014-10-10	2014-10-10	AGA（适于胎龄儿）	40	0	3400	足月儿	1989-10-24	24	1989-09-04	25	170	85	29.41	169	53	18.56	自然怀孕	顺产	其他	未保胎	无		1	1					6岁11月0天	6岁11月0天	6.92	6.92	2020-01-31	#REF!	注意力缺陷型	3	1	3	0	0	12	9
A16721	ZL16843	104	112	109	no	男	2014-05-19	2014-06-08	AGA（适于胎龄儿）	37	1	3250	足月儿	1986-10-27	27	1988-11-29	25	180	75	23.15	163	55	20.7	自然怀孕	顺产	无	孕早期保胎（怀孕前3月）,孕中期保胎（怀孕4-6月）	无		1	1					6岁6月16天	6岁6月16天	6.54	6.54	2020-01-31	#REF!	多动冲动型	1	3	6	2	0	9	14
A16787	ZL16909	107.9		107.9	no	男	2010-10-13	2010-10-13	LGA（大于胎龄儿）	40	0	6400	足月儿			1985-01-01	25								顺产	无	未保胎	有		1	1					10岁1月22天	10岁1月22天	10.14	10.14	2020-01-31	#REF!	注意力缺陷型	6	2	1	0	0	20	12
A16834	ZL16956	87.76		87.76	no	女	2008-09-23	2008-09-23	AGA（适于胎龄儿）	40	0	3950	足月儿	1983-12-25	24	1983-03-06	25	178	70	22.09	165	52	19.1	自然怀孕	剖宫产	无	未保胎	无		2	1					12岁4月9天	12岁4月9天	12.36	12.36	2020-01-31	#REF!	混合型	4	6	6	1	0	13	15
A17207	ZL17329	83	115	97	yes	男	2010-02-01	2010-02-22	AGA（适于胎龄儿）	37	0	3060	足月儿	1982-12-29	27	1985-06-03	25	177	80	25.54	170	60	20.76	自然怀孕	剖宫产	无	未保胎	无		2	1					11岁0月9天	11岁0月9天	11.02	11.02	2020-01-31	#REF!	混合型	8	5	4	1	0	22	13
A17401	ZL17523	68	79	70	no	男	2014-02-24	2014-03-17	AGA（适于胎龄儿）	37	0	2500	足月儿	1988-12-30	25	1988-07-02	25	165	75	27.55	158	45	18.03	自然怀孕	剖宫产	无	孕早期保胎（怀孕前3月）,孕中期保胎（怀孕4-6月）,孕后期保胎（怀孕7月后）	无		1	1					6岁9月17天	6岁9月17天	6.8	6.8	2020-01-31	#REF!	混合型	7	6	7	3	0	21	19
A17419	ZL17541	99.05		99.05	no	男	2010-06-16	2010-06-16	LGA（大于胎龄儿）	40	0	4200	足月儿	1982-05-05	28	1984-07-06	25	173	79	26.4	157	59	23.94	自然怀孕	剖宫产	无	未保胎	无		3	2					10岁5月28天	10岁5月28天	10.49	10.49	2020-01-31	#REF!	注意力缺陷型	3	1	1	0	0	12	4
A18347	ZL18469	94	101	97	no	女	2012-01-06	2012-01-06	AGA（适于胎龄儿）	40	0	3250	足月儿	1986-12-12	25	1986-10-12	25	174	70	23.12	158	55	22.03	自然怀孕	剖宫产	无	孕早期保胎（怀孕前3月）	有		2	1					8岁11月19天	8岁11月19天	8.97	8.97	2020-01-31	#REF!	注意力缺陷型	4	0	3	0	0	15	3
A18750	ZL18872	105.09		105.09	no	女	2007-06-02	2007-06-02	AGA（适于胎龄儿）	40	0	3500	足月儿	1982-05-06	25	1981-06-24	25	163	70	26.35	159	64	25.32	自然怀孕	顺产	无	未保胎	无		2	1					13岁6月29天	13岁6月29天	13.58	13.58	2020-01-31	#REF!	注意力缺陷型	6	0	2	0	0	17	6
A18963	ZL19085	96.33		96.33	no	男	2013-07-16	2013-07-30	AGA（适于胎龄儿）	38	0	3000	足月儿	1987-04-15	26	1988-07-03	25	175	75	24.49	157	70	28.4	自然怀孕	剖宫产	无	孕后期保胎（怀孕7月后）	无		1	2					7岁5月19天	7岁5月19天	7.47	7.47	2020-01-31	#REF!	混合型	9	4	0	0	0	24	14
A19219	ZL19341	99.51		99.51	no	女	2011-11-25	2012-02-17	LGA（大于胎龄儿）	28	0	1800	早产儿	1985-07-16	26	1985-12-08	25							自然怀孕	剖宫产	无		无		1	2					9岁1月13天	9岁1月13天	9.12	9.12	2020-01-31	#REF!	注意力缺陷型	8	1	3	0	2	18	7
A19631	ZL19753	109	123	118	yes	女	2011-05-13	2011-05-13	AGA（适于胎龄儿）	40	0	3000	足月儿	1980-08-02	30	1985-12-13	25	175	82.5	53.88	159	48	37.97	自然怀孕	顺产	无	未保胎	无		2	2					11岁4月22天	11岁4月22天	11.39	11.39	2020-01-31	#REF!	注意力缺陷型	6	1	1	0	0	18	6
A19789	ZL19911	89	101	94	no	男	2008-10-09	2008-10-09	LGA（大于胎龄儿）	40	0	6200	足月儿	1982-07-30	26	1983-07-10	25	172			157			自然怀孕	剖宫产	无										12岁3月8天	12岁3月8天	12.27	12.27	2020-01-31	#REF!	注意力缺陷型	5	2	1	0	0	17	12
A20374	ZL20496	106	106	107	no	女	2012-01-01	2012-01-08	AGA（适于胎龄儿）	39	0	3300	足月儿	1974-03-05	37	1986-06-04	25	170	65	22.49	160	51	19.92	自然怀孕	顺产	无	未保胎	无		1	1					9岁0月26天	9岁0月26天	9.07	9.07	2020-01-31	#REF!	混合型	6	5	1	1	0	15	14
A20493	ZL20615	80.88		80.88	no	男	2014-04-02	2014-04-02	AGA（适于胎龄儿）	40	0	3000	足月儿	1988-06-15	25	1988-05-04	25	177	62	19.79	164	50	18.59	自然怀孕	顺产	无	未保胎	无		1	1					6岁9月27天	6岁9月27天	6.82	6.82	2020-01-31	#REF!	混合型	9	8	0	0	0	23	20
A20694	ZL20816	109	115	114	no	男	2013-06-26	2013-06-26	AGA（适于胎龄儿）	40	0	3450	足月儿	1985-10-19	27	1988-02-22	25	166	52	18.87	160	54	21.09	自然怀孕	顺产	无	未保胎	无		1	1					7岁7月7天	7岁7月7天	7.6	7.6	2020-01-31	#REF!	混合型	5	6	0	0	1	14	15
A21196	ZL21318	115.41		115.41	no	男	2010-12-28	2011-01-11	AGA（适于胎龄儿）	38	0	3125	足月儿	1982-04-14	28	1985-07-16	25	176		22.6	170		20.76	自然怀孕	剖宫产	无	未保胎	无		1	1					10岁1月19天	10岁1月19天	10.14	10.14	2020-01-31	#REF!	注意力缺陷型	1	0	0	1	0	8	3
A21912	ZL22034	90	106	98	no	男	2016-03-04	2016-03-16	AGA（适于胎龄儿）	38	2	3500	足月儿	1985-07-20	30	1990-08-15	25	167	65	23.31	160	70	27.34	自然怀孕	剖宫产	无	孕早期保胎（怀孕前3月）	无		1	1					4岁11月28天	4岁11月28天	4.99	4.99	2020-01-31	#REF!	混合型	5	9	4	0	0	15	21
A22443	ZL22565	101	100	101	no	男	2014-10-28	2014-10-28	AGA（适于胎龄儿）	40	0	3950	足月儿	1989-06-15	25	1989-04-18	25	173	90	30.07	163	49	18.44	自然怀孕	剖宫产	无	未保胎	无		1	1					6岁4月11天	6岁4月11天	6.36	6.36	2020-01-31	#REF!	混合型	0	0	0	0	0	8	5
A23287	ZL23409	104.78		104.78	no	男	2012-07-30	2012-08-13	AGA（适于胎龄儿）	38	0	3000	足月儿	1986-06-27	26	1986-11-12	25	168	80	28.34	154	57	24.03	自然怀孕	剖宫产	无	未保胎	无		1	1					8岁7月19天	8岁7月19天	8.64	8.64	2020-01-31	#REF!	注意力缺陷型	5	4	1	1	0	15	10
A23402	ZL23524	115	92	103	no	男	2011-10-13	2011-10-20	AGA（适于胎龄儿）	39	0	3500	足月儿	1982-03-27	29	1986-03-25	25	170	75	25.95	162	56	21.34	自然怀孕	剖宫产	无	孕中期保胎（怀孕4-6月）	无		1	1					9岁5月6天	9岁5月6天	9.43	9.43	2020-01-31	#REF!	注意力缺陷型	3	1	3	0	0	10	7
A24979	ZL25101	101	80	90	no	女	2010-06-27	2010-06-27	AGA（适于胎龄儿）	40	0	3750	足月儿	1982-12-17	27	1984-12-30	25	170	98	33.91	164	56	20.82	自然怀孕	顺产	无	未保胎	无		1	1					10岁9月12天	10岁9月12天	10.78	10.78	2020-01-31	#REF!	注意力缺陷型	5	3	0	1	0	18	9
A25442	ZL25564	93	106	100	no	男	2014-08-27	2014-08-27	AGA（适于胎龄儿）	40	0	3700	足月儿	1985-12-17	28	1989-07-29	25	170	87.5	60.55	158	54	43.26	自然怀孕	剖宫产	无	孕早期保胎（怀孕前3月）	无		1	1					6岁7月18天	6岁7月18天	6.63	6.63	2020-01-31	#REF!	注意力缺陷型	5	2	2	0	0	14	10
A26335	ZL26457	96	101	98	no	男	2015-08-04	2015-08-11	AGA（适于胎龄儿）	39	0	3200	足月儿	1976-08-02	39	1989-11-19	25							自然怀孕	顺产	无	未保胎	无		2	1					5岁8月22天	5岁8月22天	5.73	5.73	2020-01-31	#REF!	混合型	5	6	1	0	0	18	20
A26459	ZL26581	98	115	106	no	女	2011-07-08	2011-07-08	AGA（适于胎龄儿）	40	0	3300	足月儿	1983-11-01	27	1986-02-14	25	170	63	21.8	158	65	26.04	自然怀孕	顺产	无	未保胎	无		1	1					9岁9月20天	9岁9月20天	9.8	9.8	2020-01-31	#REF!	混合型	9	3	0	3	0	25	14
A26948	ZL27070	129	108	123	no	男	2013-08-15	2013-08-10	AGA（适于胎龄儿）	40	5	3950	足月儿	1988-12-20	24	1988-05-22	25	178	85	26.83	168	70	24.8	自然怀孕	剖宫产	无	未保胎	无		2	1					7岁8月21天	7岁8月21天	7.72	7.72	2020-01-31	#REF!	混合型	7	9	2	0	0	18	25
A29339	ZL29461	91	115	102	no	男	2013-11-10	2013-11-10	SGA（小于胎龄儿）	40	0	2800	足月儿	1986-07-13	27	1987-12-27	25	169	74	25.91																7岁7月1天	7岁7月1天	7.59	7.59	2020-01-31	#REF!	注意力缺陷型	6	2	0	0	0	18	7
A31323	ZL31444	94	101	97	no	男	2011-06-18	2011-06-18	AGA（适于胎龄儿）	40	0	3100	足月儿	1986-01-16	25	1986-04-21	25	180	75	23.15	161	50	19.29	自然怀孕	顺产	无	未保胎	无		1	1					10岁0月17天	10岁0月17天	10.05	10.05	2020-01-31	#REF!	注意力缺陷型	3	1	0	0	0	12	7
A32431	ZL32552	87	108	96	no	男	2012-04-07	2012-04-07	SGA（小于胎龄儿）	40	0	2950	足月儿	1987-08-13	24	1986-07-07	25	172	78	26.37	160	60	23.44	自然怀孕	顺产	无	未保胎	无		1	1					9岁3月8天	9岁3月8天	9.27	9.27	2020-01-31	#REF!	混合型	7	7	0	0	0	23	22
A32773	ZL32894	72.18		72.18	no	男	2015-12-28	2015-12-28	AGA（适于胎龄儿）	40	0	4000	足月儿	1992-11-20	23	1990-09-24	25	170	65	22.49	160	60	23.44	自然怀孕	剖宫产	无	未保胎	无		1	1					5岁6月22天	5岁6月22天	5.56	5.56	2020-01-31	#REF!	注意力缺陷型	0	0	0	0	0	9	6
A32896	ZL33017	67	102	82	no	女	2014-01-11	2014-01-15	AGA（适于胎龄儿）	39	3	3580	足月儿	1989-05-17	24	1988-10-14	25	170	80	55.36	173	90	60.14	自然怀孕	顺产	无	未保胎	无		1	1					7岁6月15天	7岁6月15天	7.54	7.54	2020-01-31	#REF!	混合型	6	4	4	0	1	18	16
A38827	ZL38947	94	102	98	no	男	2012-04-25	2012-05-02	AGA（适于胎龄儿）	39	0	3000	足月儿	1981-07-12	30	1986-09-28	25							自然怀孕	剖宫产	无		无		1	1					9岁4月29天	9岁4月29天	9.41	9.41	2020-01-31	#REF!	注意力缺陷型	4	1	1	0	0	15	6
A39361	ZL39479	77	92	82	no	男	2015-08-09	2015-08-04	LGA（大于胎龄儿）	40	5	5800	足月儿	1987-12-18	27	1990-01-12	25	172	81	27.38	167	60	21.51	自然怀孕	顺产	无	未保胎	无		1	1					6岁1月28天	6岁1月28天	6.16	6.16	2020-01-31	#REF!	混合型	1	0	1	0	0	8	6
A43740	ZL43858	96	92	94	no	男	2015-10-30	2015-10-30	SGA（小于胎龄儿）	40	0	2600	足月儿	1989-09-18	26	1989-12-05	25										未保胎	无		2	2					6岁0月23天	6岁0月23天	6.06	6.06	2020-01-31	#REF!	混合型	9	7	4	2	0	26	23
A44253	ZL44371	94	77	84	no	男	2015-04-20	2015-04-20	AGA（适于胎龄儿）	40	0	3800	足月儿	1988-01-17	27	1989-07-01	25																			6岁7月10天	6岁7月10天	6.61	6.61	2020-01-31	#REF!	混合型	8	5	5	0	2	23	13
A44498	ZL44616	121	113	121	no	男	2012-10-04	2012-10-25	AGA（适于胎龄儿）	37	0	2800	足月儿	1986-11-15	25	1987-03-24	25																			9岁2月0天	9岁2月0天	9.17	9.17	2020-01-31	#REF!	注意力缺陷型	3	1	0	0	3	9	6
A44509	ZL44627	93	95	93	no	男	2012-10-16	2012-10-09	SGA（小于胎龄儿）	41	0	3050	足月儿	1987-11-11	25	1988-01-21	25	174	90	29.73	160	48	18.75	自然怀孕	顺产	无	未保胎	无		2	1					9岁1月19天	9岁1月19天	9.14	9.14	2020-01-31	#REF!	混合型	8	5	2	1	0	25	18
A4407	ZL4534	115.71		115.71	no	男	2012-08-29	2012-08-19	AGA（适于胎龄儿）	41	3	3500	足月儿	1984-09-28	27	1987-02-08	25	170	75	25.95	153	45	19.22	自然怀孕	剖宫产	无	未保胎	无	未使用药物	1	1	混合喂养（母乳为主）	5	是	1.5	8岁3月27天	8岁3月27天	8.32	8.32	2020-01-31	#REF!	注意力缺陷型	4	0	0	0	0	11	3
A45993	ZL46111	71.19		71.19	no	男	2014-04-15	2014-04-09	LGA（大于胎龄儿）	40	6	4420	足月儿	1988-10-23	25	1988-07-13	25	173	75	25.06	167	65	23.31	自然怀孕	剖宫产	无	未保胎	无		1	1					7岁8月13天	7岁8月13天	7.7	7.7	2020-01-31	#REF!	注意力缺陷型	6	1	0	0	0	15	5
A46333	ZL46451	69.62		69.62	no	女	2014-10-07	2014-10-04	AGA（适于胎龄儿）	40	3	3400	足月儿	1989-10-31	24	1989-07-04	25	180	80	49.38	166	50	36.29	自然怀孕	顺产	无	未保胎	无		1	1					7岁2月27天	7岁2月27天	7.24	7.24	2020-01-31	#REF!	混合型	2	1	0	0	0	9	7
A47346	ZL47464	104	102	103	no	男	2014-02-26	2014-02-26	LGA（大于胎龄儿）	40	0	7000	足月儿	1986-07-16	27	1988-06-11	25	175	72	23.51	167	80	28.69	自然怀孕	剖宫产	无	未保胎	无		2	1					7岁10月20天	7岁10月20天	7.89	7.89	2020-01-31	#REF!	混合型	8	8	7	2	0	22	21
A52980	ZL53098	87	75	78	no	男	2014-02-05	2014-02-16	AGA（适于胎龄儿）	38	3	2950	足月儿	1988-11-09	25	1988-10-23	25	170	70	24.22	160	50	19.53	自然怀孕	顺产	无	孕早期保胎（怀孕前3月）	有		1	1					8岁4月25天	8岁4月25天	8.4	8.4	2020-01-31	#REF!	注意力缺陷型	6	3	2	0	1	17	8
A53266	ZL53384	91	100	94	no	男	2013-10-03	2013-10-24	AGA（适于胎龄儿）	37	0	2600	足月儿	1987-08-01	26	1988-09-13	25	174	75	24.77	158	51.5	20.63	自然怀孕	顺产	无	未保胎	无		1	1					8岁9月2天	8岁9月2天	8.76	8.76	2020-01-31	#REF!	混合型	9	6	3	0	1	23	16
A61871	ZL61984	102.81		102.81	no	男	2014-04-08	2014-04-08	LGA（大于胎龄儿）	40	0	4400	足月儿	1984-09-09	29	1988-09-11	25	178	100	31.56	165	65	23.88	自然怀孕	剖宫产	无	未保胎	无		1	1					8岁6月14天	8岁6月14天	8.54	8.54	2020-01-31	#REF!	混合型	4	3	3	0	0	12	12
A62097	ZL62210	81	82	78	no	男	2016-06-16	2016-06-16	SGA（小于胎龄儿）	40	0	2900	足月儿	1986-04-12	30	1991-01-30	25	172	65	21.97	168	62	21.97	自然怀孕	顺产	无	孕早期保胎（怀孕前3月）	无		1	1					6岁4月9天	6岁4月9天	6.36	6.36	2020-01-31	#REF!	混合型	6	7	7	0	1	16	17
A63086	ZL63199	93	96	94	no	男	2014-06-06	2014-06-06	LGA（大于胎龄儿）	40	0	3000	足月儿	1989-11-04	24	1988-09-12	25																			8岁5月3天	8岁5月3天	8.42	8.42	2020-01-31	#REF!	混合型	9	6	5	0	0	20	20
A8366	ZL8493	80.33		80.33	no	男	2014-07-02	2014-07-02	AGA（适于胎龄儿）	40	0	3120	足月儿	1981-10-25	32	1988-10-10	25	172	68	22.99	166	65	23.59	自然怀孕	顺产	无	孕早期保胎（怀孕前3月）	无	未使用药物	2	1	纯母乳喂养	6	是	0.5	7岁0月26天	7岁0月26天	7.07	7.07	2020-01-31	#REF!	混合型	6	4	2	0	0	16	14
A8905	ZL9032	91	86	87	no	男	2012-11-08	2012-11-09	AGA（适于胎龄儿）	39	6	3520	足月儿	1977-10-30	35	1987-05-27	25	175	75	24.49	155	72	29.97	自然怀孕	顺产	无	未保胎	无	未使用药物	1	1	混合喂养（母乳为主）	9	是	4	7岁9月27天	7岁9月27天	7.82	7.82	2020-01-31	#REF!	混合型	5	4	4	0	2	19	15
A10129	ZL10252	95.2		95.2	no	男	2013-01-02	2013-01-22	AGA（适于胎龄儿）	37	1	2500	足月儿	1983-08-10	29	1986-06-03	26	171	85	29.07	167	52	18.65	自然怀孕	顺产	其他	孕早期保胎（怀孕前3月）	无	未使用药物	1	1	纯母乳喂养	10	否	0.5	7岁8月16天	7岁8月16天	7.71	7.71	2020-01-31	#REF!	混合型	7	8	2	1	1	23	24
A10319	ZL10442	100	102	102	no	女	2010-12-26	2010-12-24	AGA（适于胎龄儿）	40	2	3730	足月儿	1982-10-16	28	1984-07-20	26	178	90	28.41	158	52	20.83	自然怀孕	顺产	无	未保胎	无	未使用药物	1	1	混合喂养（母乳为主）	3	否	1	9岁8月25天	9岁8月25天	9.74	9.74	2020-01-31	#REF!	注意力缺陷型	8	2	2	0	0	21	10
A10584	ZL10707	96.12		96.12	no	女	2007-09-04	2007-09-03	SGA（小于胎龄儿）	40	1	3200	足月儿	1978-02-16	29	1981-06-17	26	178	102	32.19	157	54	21.91	自然怀孕	顺产	无	未保胎	无	未使用药物	1	1	纯母乳喂养	7	否	0	13岁0月19天	13岁0月19天	13.05	13.05	2020-01-31	#REF!	注意力缺陷型	3	2	1	0	0	12	7
A10878	ZL11001	95	101	98	no	男	2013-08-06	2013-08-06	AGA（适于胎龄儿）	40	0	3350	足月儿	1986-10-05	26	1987-03-16	26	185	88	25.71	172	56	18.93	自然怀孕	剖宫产	无	未保胎	无	调节甲状腺激素类药物	1	1	人工喂养	1	是	1	7岁1月19天	7岁1月19天	7.14	7.14	2020-01-31	#REF!	混合型	4	7	6	2	5	16	17
A10896	ZL11019	93.52		93.52	no	男	2011-01-31	2011-02-07	AGA（适于胎龄儿）	39	0	3190	足月儿	1981-03-03	29	1984-11-13	26	173	63	42.1	164	60.5	44.99	自然怀孕	剖宫产	无	未保胎	无	未使用药物	1	1	人工喂养	0	否	3	9岁7月26天	9岁7月26天	9.65	9.65	2020-01-31	#REF!	混合型	7	7	5	0	3	21	18
A11035	ZL11158	80.26		80.26	no	男	2011-04-25	2011-05-13	AGA（适于胎龄儿）	37	3	3300	足月儿	1981-05-30	29	1984-07-20	26	170	68	23.53	159	50	19.78	自然怀孕	顺产	无	未保胎	无	未使用药物	2	1	混合喂养（母乳为主）	6	否	1	9岁5月3天	9岁5月3天	9.42	9.42	2020-01-31	#REF!	注意力缺陷型	5	3	1	0	0	13	10
A11149	ZL11272	94.9		94.9	no	男	2012-02-26	2012-03-04	LGA（大于胎龄儿）	39	0	4300	足月儿	1979-11-10	32	1985-05-21	26	169	85	29.76	155	60	24.97	自然怀孕	剖宫产	无	未保胎	无	未使用药物	1	1	混合喂养（母乳为主）	4	否	4	8岁7月3天	8岁7月3天	8.59	8.59	2020-01-31	#REF!	注意力缺陷型	9	2	1	0	2	23	7
A11358	ZL11481	92	86	88	no	男	2014-01-30	2014-02-06	AGA（适于胎龄儿）	39	0	3350	足月儿	1980-11-25	33	1987-03-15	26	173	75	25.06	160	53	20.7	自然怀孕	顺产	其他	未保胎	无	未使用药物	1	1	纯母乳喂养	8	否	1.5	6岁9月20天	6岁9月20天	6.8	6.8	2020-01-31	#REF!	混合型	0	1	0	0	0	5	7
A11674	ZL11797	92.92		92.92	no	男	2010-07-01	2010-07-22	AGA（适于胎龄儿）	37	0	2830	足月儿	1978-12-26	31	1983-09-02	26	174	92	30.39	162	52	19.81	自然怀孕	顺产	无	未保胎	无	未使用药物	1	1	纯母乳喂养	11	否	3	10岁3月6天	10岁3月6天	10.27	10.27	2020-01-31	#REF!	混合型	5	5	1	1	0	14	14
A11888	ZL12011	103	115	110	no	男	2012-03-18	2012-04-01	AGA（适于胎龄儿）	38	0	3300	足月儿	1983-12-23	28	1985-09-20	26	173	70	23.39	163	65	24.46	自然怀孕	顺产	其他	未保胎	无	未使用药物	2	1	纯母乳喂养	18	是	2	8岁7月30天	8岁7月30天	8.67	8.67	2020-01-31	#REF!	多动冲动型	2	4	0	0	0	11	13
A11975	ZL12098	104	126	117	no	男	2014-08-08	2014-08-08	AGA（适于胎龄儿）	40	0	3000	足月儿	1979-02-20	35	1988-06-23	26	178	67.5	42.61	165	60	44.08	自然怀孕	剖宫产	无	未保胎	无	未使用药物	3	1	人工喂养	0	否	2.5	6岁2月1天	6岁2月1天	6.17	6.17	2020-01-31	#REF!	混合型	8	8	2	0	0	19	20
A12989	ZL13112	63	77	66	no	男	2014-06-20	2014-06-30	AGA（适于胎龄儿）	38	4	2850	足月儿	1983-02-12	31	1987-07-05	26	189	70	39.19	161	50	19.29	自然怀孕	剖宫产	无	未保胎	无	未使用药物	3	2	混合喂养（配方奶为主）	0	否	1.5	6岁5月11天	6岁5月11天	6.45	6.45	2020-01-31	#REF!	注意力缺陷型	5	2	1	0	0	14	9
A13605	ZL13728	134.02		134.02	no	男	2012-03-03	2012-02-25	AGA（适于胎龄儿）	41	0	3200	足月儿	1972-06-04	39	1985-05-28	26	170	62	21.45	172	50	16.9	自然怀孕	剖宫产	无	未保胎	无	未使用药物	2	2	混合喂养（母乳为主）	0	是	0	8岁7月25天	8岁7月25天	8.65	8.65	2020-01-31	#REF!	注意力缺陷型	4	0	0	0	0	13	3
A13767	ZL13890	92.51		92.51	no	男	2012-05-13	2012-05-27	AGA（适于胎龄儿）	38	0	3700	足月儿	1987-12-27	24	1986-01-05	26	174	72	23.78	160	57	22.27	自然怀孕	剖宫产	无	未保胎	无	未使用药物	2	1	纯母乳喂养	12	否	1	8岁5月17天	8岁5月17天	8.46	8.46	2020-01-31	#REF!	混合型	4	7	3	0	0	13	19
A13872	ZL13995	110.01		110.01	no	男	2012-08-03	2012-08-07	AGA（适于胎龄儿）	39	3	3290	足月儿	1982-10-19	29	1986-01-03	26	178	74	23.36	170	70	24.22	自然怀孕	顺产	无	孕早期保胎（怀孕前3月）	无	未使用药物	2	1	混合喂养（母乳为主）	2	是	1.5	8岁2月27天	8岁2月27天	8.24	8.24	2020-01-31	#REF!	混合型	6	6	2	0	0	17	16
A13880	ZL14003	81.13		81.13	no	男	2011-05-03	2011-05-03	AGA（适于胎龄儿）	40	0	3700	足月儿	1987-11-09	23	1984-06-17	26	175	75	24.49	162	50	19.05	自然怀孕	剖宫产	无	孕早期保胎（怀孕前3月）	无	未使用药物	1	2	混合喂养（配方奶为主）	6	否	0.5	9岁5月28天	9岁5月28天	9.49	9.49	2020-01-31	#REF!	混合型	5	6	3	1	1	14	18
A13984	ZL14107	93	106	100	no	男	2012-02-02	2012-02-02	LGA（大于胎龄儿）	40	0	4200	足月儿	1985-08-08	26	1985-11-14	26	176	60	193698.35	163	64	240882.23	自然怀孕	剖宫产	无	孕早期保胎（怀孕前3月）	无	未使用药物	1	1	纯母乳喂养	14	否	1	8岁9月0天	8岁9月0天	8.75	8.75	2020-01-31	#REF!	混合型	9	9	5	1	4	26	26
A14230	ZL14353	93	108	101	no	男	2013-06-25	2013-06-25	AGA（适于胎龄儿）	40	0	3750	足月儿	1987-09-29	25	1986-10-04	26	175	88	28.73	168	52	18.42	自然怀孕	顺产	无	未保胎	无	未使用药物	1	1	纯母乳喂养	10	是	1	7岁4月9天	7岁4月9天	7.36	7.36	2020-01-31	#REF!	混合型	9	8	3	1	1	26	22
A14697	ZL14820	74	90	79	no	男	2008-03-05	2008-02-29	SGA（小于胎龄儿）	40	5	2500	足月儿	1982-05-18	25	1982-03-05	26	165	70	25.71	156	47	19.31	自然怀孕	顺产	无	未保胎	无	未使用药物	1	1	纯母乳喂养	12	否	0.5	12岁8月11天	12岁8月11天	12.7	12.7	2020-01-31	#REF!	注意力缺陷型	4	4	0	1	0	15	12
A14882	ZL15005	102	126	115	no	女	2013-06-04	2013-06-18	SGA（小于胎龄儿）	38	0	1380	足月儿	1985-12-29	27	1986-10-02	26	186	230	33.24	165.5	52	18.98	自然怀孕	顺产	无	未保胎	无	未使用药物	1	1	混合喂养（母乳为主）	4	否	0.5	7岁5月8天	7岁5月8天	7.44	7.44	2020-01-31	#REF!	混合型	6	6	0	0	0	16	17
A15021	ZL15143	82	93	86	no	男	2014-04-22	2014-05-06	SGA（小于胎龄儿）	38	0	2900	足月儿	1987-05-05	26	1987-10-13	26	183	94	56.14	162	98	37.34	自然怀孕	剖宫产	无	未保胎	无	未使用药物	1	1	纯母乳喂养	6	是	3	6岁6月21天	6岁6月21天	6.56	6.56	2020-01-31	#REF!	注意力缺陷型	7	1	0	0	0	18	8
A16047	ZL16169	100.99		100.99	no	男	2014-02-06	2014-02-06	AGA（适于胎龄儿）	40	0	3600	足月儿	1985-10-28	28	1987-11-16	26	181			170			自然怀孕												6岁9月18天	6岁9月18天	6.8	6.8	2020-01-31	#REF!	注意力缺陷型	5	1	5	1	1	16	8
A16572	ZL16694	80.8		80.8	no	男	2010-12-21	2010-12-21	LGA（大于胎龄儿）	40	0	4300	足月儿	1982-08-01	28	1984-09-29	26	175	65	21.22																9岁11月12天	9岁11月12天	9.95	9.95	2020-01-31	#REF!	混合型	6	6	4	1	0	19	16
A16685	ZL16807	103	106	105	no	男	2011-08-17	2011-08-17	AGA（适于胎龄儿）	40	0	3050	足月儿	1964-06-10	47	1984-10-04	26	175	75	24.49	160	53	20.7	自然怀孕	顺产	无	未保胎	无		1	1					9岁3月17天	9岁3月17天	9.3	9.3	2020-01-31	#REF!	混合型	9	9	8	1	0	26	24
A16808	ZL16930	78	98	86	no	女	2013-07-05	2013-07-05	SGA（小于胎龄儿）	40	0	1650	足月儿	1986-05-12	27	1986-08-21	26	178	80	25.25	162	54	20.58	自然怀孕	顺产	无	孕早期保胎（怀孕前3月）	无		1	1					7岁5月0天	7岁5月0天	7.42	7.42	2020-01-31	#REF!	混合型	9	5	5	0	0	23	14
A17085	ZL17207	92.01		92.01	no	男	2008-07-21	2008-07-21	AGA（适于胎龄儿）	40	0	3200	足月儿	1976-04-30	32	1982-03-16	26	165	75	27.55	155	50	20.81	自然怀孕	顺产	无	未保胎	无		1	1					12岁4月19天	12岁4月19天	12.39	12.39	2020-01-31	#REF!	混合型	9	6	8	0	0	24	19
A19513	ZL19635	86.88		86.88	no	女	2012-11-02	2012-11-09	AGA（适于胎龄儿）	39	0	3300	足月儿	1987-06-01	25	1986-03-21	26	165	60	22.04	160	49	19.14	自然怀孕	顺产	无	未保胎	无		1	1					9岁11月11天	9岁11月11天	9.95	9.95	2020-01-31	#REF!	注意力缺陷型	0	1	0	0	0	7	4
A19794	ZL19916	72	117	90	no	男	2013-09-08	2013-09-22	AGA（适于胎龄儿）	38	0	3700	足月儿	1985-10-07	27	1986-12-03	26																			7岁4月10天	7岁4月10天	7.36	7.36	2020-01-31	#REF!	混合型	8	8	1	1	0	21	22
A20426	ZL20548	104.49		104.49	no	男	2011-06-16	2011-06-23	AGA（适于胎龄儿）	39	0	3600	足月儿	1983-12-15	27	1984-12-18	26	174	99	32.7	155	51	21.23	自然怀孕	剖宫产	无										9岁7月12天	9岁7月12天	9.62	9.62	2020-01-31	#REF!	混合型	1	3	5	0	0	8	9
A20475	ZL20597	103	102	103	no	男	2012-01-24	2012-01-24	SGA（小于胎龄儿）	40	0	2100	足月儿	1984-05-15	27	1985-10-23	26	165	80	29.38	160	53	20.7	自然怀孕	顺产	无	未保胎	无		1	1					9岁0月5天	9岁0月5天	9.01	9.01	2020-01-31	#REF!	注意力缺陷型	8	2	2	0	0	22	12
A21231	ZL21353	82	78	77	no	男	2012-08-07	2012-08-07	SGA（小于胎龄儿）	40	0	2950	足月儿	1982-06-20	30	1986-06-16	26	178	86	27.14	161	49	18.9	自然怀孕	顺产	无	未保胎	无		1	1					8岁6月10天	8岁6月10天	8.53	8.53	2020-01-31	#REF!	混合型	9	5	7	1	2	22	16
A22754	ZL22876	102	117	110	no	男	2014-04-04	2014-04-04	AGA（适于胎龄儿）	40	0	4160	足月儿	1984-12-26	29	1987-10-28	26	169	70	24.51	165	60	22.04	自然怀孕	剖宫产	无	孕早期保胎（怀孕前3月）	有		2	1					6岁11月8天	6岁11月8天	6.94	6.94	2020-01-31	#REF!	多动冲动型	4	9	4	1	1	12	23
A24014	ZL24136	94	110	102	no	女	2014-07-09	2014-07-06	LGA（大于胎龄儿）	40	3	7630	足月儿	1974-08-13	39	1988-02-12	26	168	70	2480.16	168	60	2125.85	自然怀孕	顺产	无	未保胎	有		1	1					6岁8月18天	6岁8月18天	6.72	6.72	2020-01-31	#REF!	注意力缺陷型	3	3	0	0	0	13	10
A26737	ZL26859	116	115	119	no	女	2008-05-15	2008-05-15	AGA（适于胎龄儿）	40	0	2950	足月儿	1982-11-02	25	1981-10-04	26																			12岁11月19天	12岁11月19天	12.97	12.97	2020-01-31	#REF!	多动冲动型	4	6	7	1	0	12	15
A26812	ZL26934	106	100	103	no	男	2014-07-30	2014-07-30	AGA（适于胎龄儿）	40	0	4155	足月儿	1988-07-06	26	1988-03-01	26	163	85	31.99	168	70	24.8	自然怀孕	剖宫产	无	孕早期保胎（怀孕前3月）	无		1	1					6岁9月5天	6岁9月5天	6.76	6.76	2020-01-31	#REF!	混合型	7	9	8	2	0	22	25
A160	ZL287	67	78	69	no	男	2010-10-03	2010-10-03	AGA（适于胎龄儿）	40	0	3000	足月儿	1981-01-01	29	1984-01-01	26	155	69	28.72	166	55	19.96	自然怀孕	剖宫产	无	未保胎	无	未使用药物	1	6	纯母乳喂养	6	是	3.5	0岁1月29天	0岁1月29天	10.17	10.17	2020-01-31	#REF!	混合型	6	7	0	0	0	19	16
A30866	ZL30987	111	120	119	no	男	2009-05-18	2009-05-08	AGA（适于胎龄儿）	41	3	3510	足月儿	1982-03-15	27	1983-02-01	26	172	73	24.68	153	67	28.62	自然怀孕	剖宫产	无	未保胎	无		1	1					12岁1月12天	12岁1月12天	12.12	12.12	2020-01-31	#REF!	注意力缺陷型	4	3	1	0	1	14	10
A34637	ZL34758	106	125	117	no	女	2013-02-05	2013-02-19	AGA（适于胎龄儿）	38	0	3300	足月儿	1986-08-27	26	1986-10-06	26																			8岁6月1天	8岁6月1天	8.5	8.5	2020-01-31	#REF!	混合型	7	7	7	0	0	18	18
A35381	ZL35501	116	115	119	no	男	2013-08-25	2013-09-01	LGA（大于胎龄儿）	39	0	4000	足月儿	1984-02-21	29	1986-12-22	26	170	57	19.72	173	50	16.71	自然怀孕	顺产	无	未保胎	无		1	1					7岁11月19天	7岁11月19天	7.97	7.97	2020-01-31	#REF!	注意力缺陷型	6	2	3	0	1	15	8
A39605	ZL39723	91	96	92	no	女	2012-09-08	2012-09-09	AGA（适于胎龄儿）	39	6	3650	足月儿	1985-02-26	27	1985-12-14	26	181	78	23.81	172	60	20.28	自然怀孕	顺产	无	未保胎	无		1	1					9岁0月26天	9岁0月26天	9.07	9.07	2020-01-31	#REF!	注意力缺陷型	5	1	0	0	0	15	7
A39615	ZL39733	87	70	77	no	女	2016-03-03	2016-03-03	AGA（适于胎龄儿）	40	0	3400	足月儿	1971-10-16	44	1989-06-07	26									无	未保胎	无		2	1					5岁7月1天	5岁7月1天	5.59	5.59	2020-01-31	#REF!	注意力缺陷型	5	3	1	0	0	15	12
A39793	ZL39911	89	80	83	no	男	2011-04-09	2011-04-09	AGA（适于胎龄儿）	40	0	3510	足月儿	1985-07-03	25	1984-11-20	26	183	110	32.85	158	56	22.43	自然怀孕	剖宫产	无	未保胎	无		3	1					10岁5月26天	10岁5月26天	10.49	10.49	2020-01-31	#REF!	混合型	2	4	5	1	0	12	12
A39944	ZL40062	74	93	81	yes	男	2010-07-16	2010-08-06	AGA（适于胎龄儿）	37	0	2750	足月儿	1987-07-06	23	1984-05-10	26																			11岁2月22天	11岁2月22天	11.23	11.23	2020-01-31	#REF!	注意力缺陷型	4	1	2	0	0	14	6
A43602	ZL43720	84	85	82	yes	男	2010-08-22	2010-09-05	SGA（小于胎龄儿）	38	0	2400	足月儿	1973-05-12	37	1983-10-26	26	170	122	42.21	163	69	51.94	自然怀孕	顺产	其他	孕早期保胎（怀孕前3月）	无		1	1					11岁5月6天	11岁5月6天	11.43	11.43	2020-01-31	#REF!	混合型	9	9	3	0	0	20	20
A44345	ZL44463	100	123	111	no	男	2015-01-19	2015-01-19	AGA（适于胎龄儿）	40	0	3000	足月儿	1983-08-08	31	1988-05-19	26	172	90	60.84	158	52	20.83	自然怀孕	顺产	无	未保胎	无		1	1					6岁10月14天	6岁10月14天	6.87	6.87	2020-01-31	#REF!	混合型	4	9	1	1	0	16	20
A45265	ZL45383	83.19		83.19	no	男	2012-06-28	2012-06-28	AGA（适于胎龄儿）	40	0	3900	足月儿	1983-07-27	28	1985-10-02	26	170	65	22.49	158	55	22.03	自然怀孕	剖宫产					1	1					9岁5月20天	9岁5月20天	9.47	9.47	2020-01-31	#REF!	混合型	5	7	2	1	1	15	19
A47318	ZL47436	101	120	111	no	男	2013-08-06	2013-07-30	AGA（适于胎龄儿）	41	0	3480	足月儿	1985-09-24	27	1986-11-01	26	171	93	31.8	164	55	20.45	自然怀孕	剖宫产	无	未保胎	无		3	1					8岁5月12天	8岁5月12天	8.45	8.45	2020-01-31	#REF!	混合型	8	9	6	2	0	21	24
A47712	ZL47830	94.04		94.04	no	男	2013-06-19	2013-06-19	AGA（适于胎龄儿）	40	0	3500	足月儿	1985-01-28	28	1986-10-15	26	170	65	22.49	170	60	20.76	自然怀孕	顺产	无	未保胎	无		1	1					8岁7月5天	8岁7月5天	8.6	8.6	2020-01-31	#REF!	注意力缺陷型	7	2	3	0	0	18	6
A48126	ZL48244	82	70	74	no	男	2014-08-16	2014-09-27	AGA（适于胎龄儿）	34	0	1900	早产儿	1985-08-03	29	1987-08-26	26	167	80	28.69	169	55	19.26	自然怀孕	剖宫产	无	孕早期保胎（怀孕前3月）	有		1	1					7岁5月12天	7岁5月12天	7.45	7.45	2020-01-31	#REF!	混合型	9	7	2	1	0	21	16
A48400	ZL48518	76.87		76.87	no	男	2016-02-16	2016-02-16	AGA（适于胎龄儿）	40	0	3560	足月儿	1984-08-26	31	1989-12-06	26	180	91	28.09	165	58	21.3	自然怀孕	剖宫产	无	未保胎	有		1	1					5岁11月22天	5岁11月22天	5.98	5.98	2020-01-31	#REF!	混合型	8	6	3	0	0	22	15
A49994	ZL50112	76.81		76.81	no	男	2013-07-24	2013-07-24	AGA（适于胎龄儿）	40	0	3800	足月儿	1983-03-08	30	1987-07-24	26	178	82	25.88	167	53	19	自然怀孕	顺产	无	未保胎	无		1	1					8岁7月9天	8岁7月9天	8.61	8.61	2020-01-31	#REF!	注意力缺陷型	3	1	0	0	0	10	7
A50354	ZL50472	91	82	85	no	男	2014-08-26	2014-08-26	AGA（适于胎龄儿）	40	0	3535	足月儿	1987-09-14	26	1988-07-09	26	169	60	21.01	162	56	21.34	自然怀孕	顺产	无	未保胎	无		1						7岁6月13天	7岁6月13天	7.54	7.54	2020-01-31	#REF!	注意力缺陷型	7	1	0	0	0	21	6
A7638	ZL7765	65.44		65.44	no	男	2010-08-02	2010-08-17	AGA（适于胎龄儿）	37	6	3300	足月儿	1982-08-21	27	1983-12-30	26	160	65	25.39	165	60	22.04	自然怀孕	顺产	其他	孕早期保胎（怀孕前3月）	无	未使用药物	1	1	混合喂养（母乳为主）	4	否	1	10岁8月14天	10岁8月14天	10.71	10.71	2020-01-31	#REF!	注意力缺陷型	5	1	1	0	0	15	10
A7750	ZL7877	116.17		116.17	no	男	2012-05-26	2012-06-09	AGA（适于胎龄儿）	38	0	3150	足月儿	1986-03-09	26	1985-11-10	26	177	80	25.54	173	45	15.04	自然怀孕	顺产	无	未保胎	无	未使用药物	1	1	混合喂养（配方奶为主）	0	是	1	9岁1月11天	9岁1月11天	9.11	9.11	2020-01-31	#REF!	注意力缺陷型	7	4	6	0	0	17	11
A7895	ZL8022	90.57		90.57	yes	男	2009-12-16	2010-01-13	SGA（小于胎龄儿）	36	0	2600	早产儿	1975-05-19	34	1983-09-02	26	172	63	212952.95	165	62	22.77	自然怀孕	剖宫产	无	未保胎	有	其他	2	1	人工喂养	0	否	3	11岁6月2天	11岁6月2天	11.51	11.51	2020-01-31	#REF!	注意力缺陷型	5	3	3	0	0	15	12
A9189	ZL9316	77.35		77.35	no	男	2010-07-16	2010-07-21	AGA（适于胎龄儿）	39	2	3550	足月儿	1983-09-01	26	1983-10-11	26	175	70	22.86	160	60	23.44	自然怀孕	剖宫产	无	未保胎	无	未使用药物	1	1	混合喂养（母乳为主）	3	否	4	10岁1月23天	10岁1月23天	10.15	10.15	2020-01-31	#REF!	注意力缺陷型	5	2	7	0	0	15	11
A9426	ZL9553	92	93	91	no	男	2014-07-29	2014-08-12	AGA（适于胎龄儿）	38	0	3500	足月儿	1990-07-11	24	1988-04-29	26	179.5	63	19.55	160	53	20.7	自然怀孕	顺产	无	未保胎	无	未使用药物	1	1	纯母乳喂养	12	是	2	6岁1月13天	6岁1月13天	6.12	6.12	2020-01-31	#REF!	混合型	6	7	2	0	0	17	21
A9483	ZL9609	90.59		90.59	no	女	2011-01-11	2011-01-25	AGA（适于胎龄儿）	38	0	2950	足月儿	1985-04-10	25	1984-10-06	26	172	65	43.94	163	52.5	39.52	自然怀孕	顺产	其他	孕早期保胎（怀孕前3月）,孕后期保胎（怀孕7月后）	无	未使用药物	3	1	混合喂养（配方奶为主）	1	否	0.5	9岁8月13天	9岁8月13天	9.7	9.7	2020-01-31	#REF!	混合型	0	1	0	0	0	9	8
A9822	ZL9945	94.37		94.37	no	男	2014-09-23	2014-09-30	AGA（适于胎龄儿）	39	0	3680	足月儿	1989-12-21	24	1988-03-28	26	180	70	21.6	170	59	20.42	自然怀孕	剖宫产	无	孕后期保胎（怀孕7月后）	有	其他	1	1	混合喂养（母乳为主）	12	是	0	5岁11月22天	5岁11月22天	5.98	5.98	2020-01-31	#REF!	混合型	7	8	2	0	0	19	22
A9963	ZL10086	82	105	84.64	no	男	2014-07-18	2014-07-23	AGA（适于胎龄儿）	39	2	3800	足月儿	1991-02-16	23	1986-12-22	27	170	65	44.98	165	90	66.12	自然怀孕	剖宫产	无	未保胎	无	未使用药物	1	1	人工喂养	0	否	0	6岁1月29天	6岁1月29天	6.16	6.16	2020-01-31	#REF!	混合型	9	9	5	0	0	24	23
A10198	ZL10321	84.38		84.38	no	男	2015-08-10	2015-07-20	AGA（适于胎龄儿）	43	0	3910	过期产儿	1977-04-28	38	1988-01-10	27	178	65	20.52	160	55	21.48	自然怀孕	剖宫产	无	未保胎	无	未使用药物	1	1	混合喂养（配方奶为主）	1	是	0	5岁1月8天	5岁1月8天	5.11	5.11	2020-01-31	#REF!	混合型	0	0	1	0	0	7	7
A10261	ZL10384	90.99		90.99	no	男	2009-01-15	2009-02-05	AGA（适于胎龄儿）	37	0	2900	足月儿	1982-10-24	26	1981-12-15	27	175	63	20.57	157	48	38.95	自然怀孕	剖宫产	无	未保胎	无	未使用药物	1	1	混合喂养（母乳为主）	7	否	1	12岁0月5天	12岁0月5天	12.01	12.01	2020-01-31	#REF!	注意力缺陷型	2	0	0	0	0	11	1
A10338	ZL10461	79.72		79.72	yes	男	2009-06-29	2009-07-17	AGA（适于胎龄儿）	37	3	3500	足月儿	1968-10-16	40	1981-08-24	27	167	70	25.1	165	65	23.88	自然怀孕	剖宫产	无	孕早期保胎（怀孕前3月）	无	未使用药物	1	1	纯母乳喂养	8	否	0.5	11岁2月27天	11岁2月27天	11.24	11.24	2020-01-31	#REF!	注意力缺陷型	5	3	0	0	0	15	9
A10434	ZL10557	109.58		109.58	no	男	2012-04-20	2012-06-15	SGA（小于胎龄儿）	32	0	3500	早产儿	1989-06-26	22	1985-03-17	27	170	110	38.06	165	65	47.75	自然怀孕	顺产	无	未保胎	无	未使用药物	1	2	人工喂养	0	否	1	8岁5月1天	8岁5月1天	8.42	8.42	2020-01-31	#REF!	混合型	5	4	0	0	0	17	13
A10846	ZL10969	96.86		96.86	yes	男	2009-12-30	2009-12-30	AGA（适于胎龄儿）	40	0	3450	足月儿	1979-06-20	30	1982-11-05	27	170		25.26	165		20.2	自然怀孕	顺产	无	未保胎	无	未使用药物	2	1	混合喂养（配方奶为主）	9	否	0.5	11岁0月21天	11岁0月21天	11.06	11.06	2020-01-31	#REF!	多动冲动型	4	5	3	0	1	12	15
A10891	ZL11014	104	101	103	no	男	2012-01-28	2012-02-11	LGA（大于胎龄儿）	38	0	4100	足月儿	1981-10-25	30	1984-05-05	27	174	74	24.44	157	44	17.85	自然怀孕	剖宫产	无	未保胎	无	未使用药物	1	1	混合喂养（配方奶为主）	1	是	0.5	8岁9月10天	8岁9月10天	8.78	8.78	2020-01-31	#REF!	混合型	7	6	7	1	1	22	18
A10970	ZL11093	95	110	103	no	男	2014-04-16	2014-04-09	AGA（适于胎龄儿）	41	0	3700	足月儿	1984-07-16	29	1986-05-27	27	178	65	20.52	160	50	19.53	自然怀孕	剖宫产	无	未保胎	无	未使用药物	1	1	人工喂养	0	否	0	6岁5月12天	6岁5月12天	6.45	6.45	2020-01-31	#REF!	注意力缺陷型	9	2	1	0	0	25	6
A11043	ZL11166	93.54		93.54	no	女	2012-12-02	2012-12-17	LGA（大于胎龄儿）	37	6	3020	足月儿	1982-09-09	30	1985-09-05	27	161	69	26.62	161	56	21.6	自然怀孕	剖宫产	无	未保胎	无	未使用药物	1	1	纯母乳喂养	12	否	0	7岁9月26天	7岁9月26天	7.82	7.82	2020-01-31	#REF!	注意力缺陷型	3	0	0	0	0	12	3
A11261	ZL11384	96	119	107	no	男	2014-07-25	2014-07-28	AGA（适于胎龄儿）	39	4	3725	足月儿	1982-11-08	31	1987-01-20	27	168	55	19.49	160	60	23.44	自然怀孕	顺产	无	未保胎	无	未使用药物	1	1	纯母乳喂养	6	否	1	6岁2月5天	6岁2月5天	6.18	6.18	2020-01-31	#REF!	注意力缺陷型	7	4	0	0	0	17	12
A11336	ZL11459	110.48		110.48	no	男	2008-01-22	2008-02-05	AGA（适于胎龄儿）	38	0	3300	足月儿	1980-11-28	27	1980-07-20	27	166	66	23.95	162	66	25.15	自然怀孕	剖宫产	缺氧窒息	孕中期保胎（怀孕4-6月）	无	未使用药物	1	1	纯母乳喂养	10	否	0.5	12岁8月14天	12岁8月14天	12.71	12.71	2020-01-31	#REF!	注意力缺陷型	5	4	2	0	0	14	10
A11401	ZL11524	104.62		104.62	no	男	2012-07-26	2012-07-28	AGA（适于胎龄儿）	39	5	3900	足月儿	1981-08-18	30	1984-08-25	27	180	75	23.15	167	52	18.65	自然怀孕	剖宫产	无	未保胎	无	未使用药物	3	1	纯母乳喂养	11	是	1	8岁2月10天	8岁2月10天	8.19	8.19	2020-01-31	#REF!	多动冲动型	3	7	0	0	0	12	16
A11468	ZL11591	94.5		94.5	no	男	2011-06-21	2011-06-18	AGA（适于胎龄儿）	40	3	3720	足月儿	1982-09-11	28	1984-04-10	27	172	70	23.66	168	55	19.49	自然怀孕	顺产	无	孕早期保胎（怀孕前3月）	无	未使用药物	2	1	纯母乳喂养	10	否	1	9岁3月14天	9岁3月14天	9.29	9.29	2020-01-31	#REF!	混合型	1	1	0	0	0	8	7
A11477	ZL11600	86.29		86.29	no	男	2007-01-04	2007-01-10	AGA（适于胎龄儿）	39	1	3250	足月儿	1975-09-10	31	1979-06-29	27	174	80	26.42	162	65	24.77	自然怀孕	剖宫产	无	未保胎	无	未使用药物	1	1	混合喂养（母乳为主）	16	否	0.5	13岁9月2天	13岁9月2天	13.76	13.76	2020-01-31	#REF!	注意力缺陷型	1	0	0	0	0	6	2
A11507	ZL11630	88	108	97	no	男	2011-03-27	2011-03-27	AGA（适于胎龄儿）	40	0	3500	足月儿	1980-07-21	30	1983-07-06	27	166	75	27.22	156	55	22.6	自然怀孕	剖宫产	无	未保胎	无	未使用药物	3	1	混合喂养（配方奶为主）	1	否	0.5	9岁6月10天	9岁6月10天	9.53	9.53	2020-01-31	#REF!	混合型	9	8	4	1	0	23	17
A11591	ZL11714	74.15		74.15	no	男	2011-01-30	2011-01-30	AGA（适于胎龄儿）	40	0	4000	足月儿	1981-07-03	29	1983-03-20	27	170	55	19.03	160	50	19.53	自然怀孕	顺产	无	未保胎	无	未使用药物	1	1	纯母乳喂养	6	否	2	9岁8月7天	9岁8月7天	9.69	9.69	2020-01-31	#REF!	混合型	5	4	5	0	1	17	13
A11606	ZL11729	101	92	96	no	男	2013-06-03	2013-06-14	LGA（大于胎龄儿）	38	3	4100	足月儿	1983-01-27	30	1985-11-11	27	172	72	24.34	160	65	25.39	人工授孕/试管婴儿	剖宫产	缺氧窒息	孕早期保胎（怀孕前3月）	无	其他	4	1	混合喂养（母乳为主）	1	否	1	7岁4月6天	7岁4月6天	7.35	7.35	2020-01-31	#REF!	混合型	9	4	8	3	1	23	13
A11622	ZL11745	81	80	77	yes	男	2008-12-07	2008-11-02	SGA（小于胎龄儿）	45	0	2700	过期产儿	1977-07-16	31	1981-02-02	27	178	90	28.41	155	48	19.98	自然怀孕	剖宫产	无	孕后期保胎（怀孕7月后）	无	未使用药物	1	1	混合喂养（配方奶为主）	3	否	1	11岁10月0天	11岁10月0天	11.83	11.83	2020-01-31	#REF!	注意力缺陷型	6	3	2	0	0	15	12
A11663	ZL11786	83	100	89	no	男	2012-01-13	2012-01-08	AGA（适于胎龄儿）	40	5	3450	足月儿	1983-03-17	28	1984-03-17	27	172	85	28.73	160	75	29.3	自然怀孕	顺产	无	孕早期保胎（怀孕前3月）	无	未使用药物	1	1	混合喂养（配方奶为主）	0	是	3.5	8岁8月25天	8岁8月25天	8.74	8.74	2020-01-31	#REF!	混合型	9	8	7	1	6	27	22
A11716	ZL11839	106	104	105	no	男	2013-11-18	2013-11-11	AGA（适于胎龄儿）	41	0	3755	足月儿	1985-11-08	28	1986-08-04	27	170	75	25.95	164	53	19.71	自然怀孕	顺产	无	未保胎	无	未使用药物	1	1	混合喂养（母乳为主）	8	是	0.5	6岁10月23天	6岁10月23天	6.9	6.9	2020-01-31	#REF!	混合型	8	7	5	0	0	22	22
A11862	ZL11985	85.55		85.55	no	男	2013-08-29	2013-09-12	LGA（大于胎龄儿）	38	0	3800	足月儿	1987-01-24	26	1986-02-02	27	170	85	29.41	165	60	22.04	自然怀孕	剖宫产	其他	未保胎	无	未使用药物	1	1	混合喂养（配方奶为主）	1	否	1.5	7岁1月10天	7岁1月10天	7.11	7.11	2020-01-31	#REF!	注意力缺陷型	7	2	0	0	0	19	10
A11934	ZL12057	91.75		91.75	no	女	2008-05-09	2008-05-16	AGA（适于胎龄儿）	39	0	3350	足月儿	1981-01-01	27	1981-01-01	27	175	74	24.16	158	50	20.03	自然怀孕	剖宫产	无	未保胎	无	未使用药物	1	1	人工喂养	0	否	0	12岁5月0天	12岁5月0天	12.42	12.42	2020-01-31	#REF!	注意力缺陷型	3	0	0	0	0	12	1
A11962	ZL12085	94.17		94.17	no	男	2010-08-08	2010-08-08	AGA（适于胎龄儿）	40	0	3600	足月儿	1985-05-16	25	1983-05-25	27	180	85	26.23	158	50	20.03	自然怀孕	剖宫产	无	未保胎	无	未使用药物	1	1	混合喂养（母乳为主）	0	否	0.5	10岁2月1天	10岁2月1天	10.17	10.17	2020-01-31	#REF!	注意力缺陷型	8	1	0	0	0	23	6
A12121	ZL12244	118.13		118.13	no	男	2014-03-26	2014-04-02	LGA（大于胎龄儿）	39	0	4000	足月儿	1987-09-20	26	1987-01-05	27	165	70	25.71	160	48	18.75	自然怀孕	剖宫产	无	未保胎	有	未使用药物	1	1	人工喂养	0	否	3	6岁6月17天	6岁6月17天	6.55	6.55	2020-01-31	#REF!	混合型	8	9	4	3	2	22	21
A12311	ZL12434	107	125	118	no	男	2016-08-21	2016-08-20	AGA（适于胎龄儿）	40	1	3750	足月儿	1983-11-05	32	1988-11-20	27	182	80	24.15	167.5	57	20.32	自然怀孕	顺产	无	未保胎	无	未使用药物	1	1	纯母乳喂养	8	否	1	4岁1月24天	4岁1月24天	4.15	4.15	2020-01-31	#REF!	多动冲动型	5	7	2	0	0	11	17
A12351	ZL12474	88	92	89	no	男	2012-02-17	2012-03-09	AGA（适于胎龄儿）	37	0	3250	足月儿	1982-09-28	29	1984-05-13	27	172	60	20.28	158	60	24.03	自然怀孕	剖宫产	无	未保胎	无	未使用药物	1	1	混合喂养（母乳为主）	7	是	1	8岁7月27天	8岁7月27天	8.66	8.66	2020-01-31	#REF!	混合型	6	6	5	0	0	19	18
A12455	ZL12578	121.69		121.69	no	男	2014-05-23	2014-06-07	AGA（适于胎龄儿）	37	6	3150	足月儿	1984-09-27	29	1986-06-22	27	175	75	24.49	160	59	23.05	自然怀孕	顺产	无	未保胎	无	未使用药物	1	1	混合喂养（母乳为主）	18	否	1.5	6岁4月24天	6岁4月24天	6.4	6.4	2020-01-31	#REF!	混合型	6	5	5	1	1	17	15
A12488	ZL12611	82	101	89	yes	男	2009-05-22	2009-05-15	AGA（适于胎龄儿）	41	0	3750	足月儿	1983-09-06	25	1982-04-28	27	175	75	24.49	170	70	24.22	自然怀孕	剖宫产	无	未保胎	无	未使用药物	3	1	纯母乳喂养	8	否	0	11岁4月25天	11岁4月25天	11.4	11.4	2020-01-31	#REF!	多动冲动型	4	4	6	0	0	12	13
A12653	ZL12776	122	110	120	no	男	2010-11-02	2010-10-30	AGA（适于胎龄儿）	40	3	3600	足月儿	1980-10-28	30	1983-05-12	27	168	78	27.64	172	58	19.61	自然怀孕	顺产	无	未保胎	无	未使用药物	1	1	混合喂养（配方奶为主）	3	是	1	9岁11月17天	9岁11月17天	9.96	9.96	2020-01-31	#REF!	混合型	7	9	5	2	1	18	20
A12958	ZL13081	123.41		123.41	no	男	2010-12-30	2011-01-06	AGA（适于胎龄儿）	39	0	3200	足月儿	1981-11-08	29	1983-07-30	27	180	67	20.68	170	68	23.53	自然怀孕	顺产	无	孕早期保胎（怀孕前3月）	无	其他	1	1	混合喂养（配方奶为主）	0	是	2	9岁9月22天	9岁9月22天	9.81	9.81	2020-01-31	#REF!	注意力缺陷型	7	2	6	0	4	22	6
A12995	ZL13118	96.72		96.72	no	男	2013-01-25	2013-01-18	AGA（适于胎龄儿）	41	0	3880	足月儿	1984-10-17	28	1985-12-11	27	180	90	27.78	160	58	22.66	自然怀孕	剖宫产	无	未保胎	无	未使用药物	1	1	混合喂养（母乳为主）	8	是	0	7岁8月27天	7岁8月27天	7.74	7.74	2020-01-31	#REF!	混合型	8	6	6	1	0	19	18
A13096	ZL13219	89	119	103	no	男	2012-02-17	2012-02-22	AGA（适于胎龄儿）	39	2	2900	足月儿	1976-10-20	35	1984-11-19	27	176	95	30.67	162	72	27.43	自然怀孕	剖宫产	无	未保胎	无	未使用药物	3	1	混合喂养（母乳为主）	6	否	0.5	8岁8月5天	8岁8月5天	8.68	8.68	2020-01-31	#REF!	混合型	4	3	0	0	0	12	11
A13516	ZL13639	88	93	89	no	男	2010-08-10	2010-08-03	AGA（适于胎龄儿）	41	0	4250	足月儿	1984-10-05	25	1983-07-31	27	173	75	25.06	162	66	25.15	自然怀孕	剖宫产	无	未保胎	无	未使用药物	1	1	混合喂养（母乳为主）	9	否	4	10岁2月17天	10岁2月17天	10.21	10.21	2020-01-31	#REF!	注意力缺陷型	6	2	1	0	0	15	8
A13779	ZL13902	88	98	91	no	男	2012-12-02	2012-12-19	SGA（小于胎龄儿）	37	4	3750	足月儿	1981-04-06	31	1984-08-13	27	170	81	280276.82	154	55	231910.95	自然怀孕	剖宫产	无	未保胎	无	未使用药物	1	1	混合喂养（母乳为主）	3	是	2	7岁10月28天	7岁10月28天	7.91	7.91	2020-01-31	#REF!	混合型	6	8	2	0	0	17	19
A14048	ZL14171	78	102	88	no	男	2012-09-10	2012-09-17	SGA（小于胎龄儿）	39	0	2650	足月儿	1983-03-11	29	1984-11-14	27	175	76	24.82	155	46	19.15	自然怀孕	剖宫产	无	未保胎	无	未使用药物	1	1	人工喂养	0	是	0.5	8岁1月25天	8岁1月25天	8.15	8.15	2020-01-31	#REF!	注意力缺陷型	6	3	3	0	1	17	11
A14555	ZL14678	111	110	113	no	男	2014-05-29	2014-06-05	AGA（适于胎龄儿）	39	0	3520	足月儿	1986-10-08	27	1986-12-29	27	183	79	23.59	164	55	20.45	自然怀孕	顺产	无	未保胎	有	未使用药物	2	1	纯母乳喂养	14	否	1	6岁6月1天	6岁6月1天	6.5	6.5	2020-01-31	#REF!	注意力缺陷型	4	2	2	0	1	12	8
A14650	ZL14773	73	83	75	no	男	2014-04-06	2014-04-06	AGA（适于胎龄儿）	40	0	3100	足月儿	1982-08-21	31	1986-10-16	27	173	78	26.06	161	49	18.9	自然怀孕	顺产	无	未保胎	无	未使用药物	1	1	纯母乳喂养	11	否	0.5	6岁7月3天	6岁7月3天	6.59	6.59	2020-01-31	#REF!	注意力缺陷型	5	2	5	1	0	14	11
A15097	ZL15219	89	87	87	no	男	2010-09-04	2010-09-18	AGA（适于胎龄儿）	38	0	3500	足月儿	1984-08-04	26	1982-10-20	27	170	70	24.22	160	47	18.36	自然怀孕	顺产	无	未保胎	无	未使用药物	1	1	纯母乳喂养	8	否	1	10岁2月10天	10岁2月10天	10.19	10.19	2020-01-31	#REF!	注意力缺陷型	8	1	1	0	1	22	5
A15807	ZL15929	102	102	103	no	女	2014-05-14	2014-05-14	AGA（适于胎龄儿）	40	0	3550	足月儿	1977-03-31	37	1987-01-13	27							自然怀孕	剖宫产	无	未保胎	无		1	1					6岁6月7天	6岁6月7天	6.52	6.52	2020-01-31	#REF!	注意力缺陷型	5	1	0	0	0	13	7
A15950	ZL16072	67	101	81	no	女	2013-10-27	2013-10-27	AGA（适于胎龄儿）	40	0	4100	足月儿	1981-04-01	32	1986-05-22	27	183	240	71.67	156	63	51.78	人工授孕/试管婴儿	顺产	无	未保胎	无		1	1					7岁0月27天	7岁0月27天	7.07	7.07	2020-01-31	#REF!	混合型	8	4	3	0	0	24	14
A16294	ZL16416	104.48		104.48	no	男	2007-09-12	2007-09-12	AGA（适于胎龄儿）	40	0	4000	足月儿	1979-09-30	27	1980-06-30	27	171	70	23.94	155	55	22.89	自然怀孕	剖宫产	其他	未保胎	无		1	1					13岁2月15天	13岁2月15天	13.21	13.21	2020-01-31	#REF!	混合型	5	6	2	1	1	18	17
A16711	ZL16833	77	108	90	no	男	2012-11-28	2012-11-28	SGA（小于胎龄儿）	40	0	2800	足月儿	1982-01-27	30	1985-08-15	27	174	65	21.47	164	56	20.82		剖宫产	无	未保胎	无		2	2					8岁0月5天	8岁0月5天	8.01	8.01	2020-01-31	#REF!	混合型	7	6	8	2	0	18	15
A16780	ZL16902	121.57		121.57	no	男	2015-11-03	2015-11-03	AGA（适于胎龄儿）	40	0	3000	足月儿	1986-08-13	29	1988-01-29	27	178			167	75	26.89	自然怀孕	剖宫产	缺氧窒息	孕早期保胎（怀孕前3月）	有		1	1					5岁1月1天	5岁1月1天	5.09	5.09	2020-01-31	#REF!	混合型	1	2	0	0	0	7	7
A17557	ZL17679	110	106	110	no	男	2013-01-29	2013-01-29	LGA（大于胎龄儿）	40	0	3000	足月儿	1981-11-03	31	1986-01-23	27			22.4			20.58	自然怀孕	顺产	无	未保胎	无		2	1					7岁10月17天	7岁10月17天	7.88	7.88	2020-01-31	#REF!	注意力缺陷型	9	1	4	1	1	21	3
A17567	ZL17689	93	99	95	no	男	2016-08-24	2016-09-07	AGA（适于胎龄儿）	38	0	3000	足月儿			1988-11-06	27							自然怀孕	顺产	无	未保胎			1	1					4岁3月22天	4岁3月22天	4.31	4.31	2020-01-31	#REF!	多动冲动型	1	3	2	0	0	5	10
A17818	ZL17940	94	108	102	no	女	2013-11-19	2013-11-28	AGA（适于胎龄儿）	38	5	3500	足月儿	1984-05-22	29	1985-12-06	27																			7岁0月29天	7岁0月29天	7.08	7.08	2020-01-31	#REF!	注意力缺陷型	4	2	1	0	0	11	8
A17941	ZL18063	94	106	101	no	男	2012-04-30	2012-05-14	AGA（适于胎龄儿）	38	0	3400	足月儿	1982-12-26	29	1985-05-05	27	176	80	25.83	167	57	20.44	自然怀孕	顺产	无	未保胎	无		1	1					8岁7月21天	8岁7月21天	8.64	8.64	2020-01-31	#REF!	混合型	9	8	4	0	0	24	21
A17943	ZL18065	90.87		90.87	no	女	2012-11-05	2012-11-05	AGA（适于胎龄儿）	40	0	3450	足月儿	1984-11-28	27	1985-11-12	27	183	97.5	58.23	157	66	26.78	自然怀孕	剖宫产	无	未保胎	无		1	1					8岁1月16天	8岁1月16天	8.13	8.13	2020-01-31	#REF!	注意力缺陷型	6	4	2	0	0	16	11
A18107	ZL18229	83	95	87	no	男	2010-02-14	2010-02-14	SGA（小于胎龄儿）	40	0	1550	足月儿	1978-09-14	31	1982-09-11	27	175	85	27.76	160	50	19.53	自然怀孕	顺产	无	未保胎									10岁10月9天	10岁10月9天	10.86	10.86	2020-01-31	#REF!	注意力缺陷型	6	3	2	0	0	20	11
A18754	ZL18876	89	93	90	no	男	2014-02-01	2014-01-16	AGA（适于胎龄儿）	42	2	3600	过期产儿	1986-02-27	27	1986-02-24	27	175	80	26.12	162	65	24.77	自然怀孕	顺产	无	未保胎	无		1	1					7岁6月1天	7岁6月1天	7.5	7.5	2020-01-31	#REF!	注意力缺陷型	9	3	1	0	1	23	12
A19665	ZL19787	100	102	102	no	男	2011-12-26	2011-12-26	AGA（适于胎龄儿）	40	0	3300	足月儿	1982-03-08	29	1984-10-30	27																			9岁0月20天	9岁0月20天	9.05	9.05	2020-01-31	#REF!	混合型	8	4	4	1	0	19	13
A19728	ZL19850	121.39		121.39	no	男	2017-01-15	2017-01-15	AGA（适于胎龄儿）	40	0	3230	足月儿	1988-05-15	28	1989-01-26	27	183	100	29.86	158	52	20.83	自然怀孕	顺产	无	孕早期保胎（怀孕前3月）	无		1	1					4岁0月1天	4岁0月1天	4	4	2020-01-31	#REF!	多动冲动型	0	5	0	0	0	4	11
A19764	ZL19886	81	83	79	no	男	2006-07-10	2006-07-10	SGA（小于胎龄儿）	40	0	2500	足月儿	1978-10-12	27	1979-05-21	27	170	70	48.44	162	61	23.24	自然怀孕												14岁6月7天	14岁6月7天	14.52	14.52	2020-01-31	#REF!	注意力缺陷型	9	1	4	0	0	21	7
A19908	ZL20030	84.74		84.74	no	男	2007-10-12	2007-10-12	AGA（适于胎龄儿）	40	0	4160	足月儿	1978-08-18	29	1979-12-17	27	173	80	26.73	165	52	19.1	自然怀孕	剖宫产	无	未保胎	无		1	1					13岁3月7天	13岁3月7天	13.27	13.27	2020-01-31	#REF!	注意力缺陷型	3	0	0	0	0	13	4
A20147	ZL20269	100	115	107	no	男	2012-06-01	2012-06-15	AGA（适于胎龄儿）	38	0	3500	足月儿	1974-12-25	37	1985-01-01	27																			8岁7月21天	8岁7月21天	8.64	8.64	2020-01-31	#REF!	混合型	4	8	1	0	1	14	18
A20527	ZL20649	102.66		102.66	no	男	2008-06-10	2008-06-22	AGA（适于胎龄儿）	38	2	3156	足月儿	1977-08-09	30	1981-01-30	27	181	67	20.45	155	48	19.98	自然怀孕	顺产	无	未保胎	无		1	1					12岁7月20天	12岁7月20天	12.64	12.64	2020-01-31	#REF!	混合型	3	4	3	0	0	12	11
A20882	ZL21004	107	112	111	no	男	2011-09-22	2011-09-22	AGA（适于胎龄儿）	40	0	3300	足月儿	1978-09-11	33	1984-02-02	27	173	76	25.39	156	50	20.55	自然怀孕	顺产	无	未保胎	无		1	1					9岁4月16天	9岁4月16天	9.38	9.38	2020-01-31	#REF!	注意力缺陷型	3	1	4	0	0	13	7
A21044	ZL21166	86.16		86.16	no	男	2011-08-08	2011-08-15	AGA（适于胎龄儿）	39	0	3600	足月儿	1984-04-12	27	1984-06-02	27	174	64	21.14	164	60	22.31	自然怀孕	顺产	无	未保胎	无		1	1					9岁6月2天	9岁6月2天	4.01	9.51	2020-01-31	#REF!	混合型	0	1	0	0	0	7	5
A21154	ZL21276	91.76		91.76	no	女	2010-08-13	2010-08-17	AGA（适于胎龄儿）	39	3	3000	足月儿	1980-01-19	30	1982-09-16	27	170	70	24.22	160	52	20.31	自然怀孕	顺产	无	未保胎	无		1	1					10岁6月3天	10岁6月3天	10.51	10.51	2020-01-31	#REF!	注意力缺陷型	6	3	5	1	0	17	11
A22671	ZL22793	91	98	93	no	男	2014-05-20	2014-05-29	AGA（适于胎龄儿）	38	5	3640	足月儿	1983-04-16	31	1987-02-20	27	168	65	23.03	160	60	23.44	自然怀孕	剖宫产	无	未保胎	无		1	1					6岁9月22天	6岁9月22天	6.81	6.81	2020-01-31	#REF!	注意力缺陷型	3	1	1	0	0	12	9
A22735	ZL22857	96	92	94	no	男	2012-08-28	2012-08-20	AGA（适于胎龄儿）	41	1	3350	足月儿	1984-09-18	27	1984-11-23	27	175	86	28.08	158	50	20.03	自然怀孕	顺产	无	未保胎	无		1	1					8岁6月14天	8岁6月14天	8.54	8.54	2020-01-31	#REF!	注意力缺陷型	3	1	0	0	0	8	2
A23027	ZL23149	109.81		109.81	no	男	2015-05-06	2015-05-20	LGA（大于胎龄儿）	38	0	3750	足月儿	1980-01-08	35	1987-12-05	27	170	70	24.22	165	65	23.88	自然怀孕	顺产	无	未保胎	有		1	1					5岁10月10天	5岁10月10天	5.86	5.86	2020-01-31	#REF!	混合型	0	1	0	0	0	5	8
A23241	ZL23363	124	105	118	no	男	2014-03-30	2014-03-30	AGA（适于胎龄儿）	40	0	3400	足月儿	1987-03-22	27	1987-01-02	27	180	75	23.15	154	55	23.19	自然怀孕	剖宫产	无	未保胎	无		1	1					6岁11月19天	6岁11月19天	6.97	6.97	2020-01-31	#REF!	多动冲动型	3	8	2	0	0	11	21
A23284	ZL23406	81.26		81.26	no	男	2012-02-27	2012-02-27	SGA（小于胎龄儿）	40	0	3500	足月儿	1984-07-26	27	1984-07-25	27	176	67.5	43.58	164	60	44.62	自然怀孕	剖宫产	无	未保胎	无		1	1					9岁0月20天	9岁0月20天	9.05	9.05	2020-01-31	#REF!	注意力缺陷型	4	1	5	0	2	15	8
A23853	ZL23975	115	113	117	no	女	2014-06-04	2014-06-04	AGA（适于胎龄儿）	40	0	3200	足月儿	1988-04-14	26	1986-11-10	27	186	85	24.57	167	57	20.44	自然怀孕	顺产	无	未保胎	无		1	1					6岁9月21天	6岁9月21天	6.81	6.81	2020-01-31	#REF!	混合型	9	8	6	0	0	25	21
A24255	ZL24377	107	108	109	no	男	2008-11-14	2008-11-21	AGA（适于胎龄儿）	39	0	3750	足月儿	1980-04-28	28	1981-06-23	27	180																		12岁4月16天	12岁4月16天	12.38	12.38	2020-01-31	#REF!	注意力缺陷型	4	3	4	0	0	15	12
A25802	ZL25924	129	105	121	no	男	2012-08-23	2012-08-30	LGA（大于胎龄儿）	39	0	4550	足月儿	1984-06-12	28	1985-05-07	27	172			169			自然怀孕	剖宫产	无	未保胎	无		3	1					8岁7月27天	8岁7月27天	8.66	8.66	2020-01-31	#REF!	注意力缺陷型	3	1	0	0	0	10	5
A25915	ZL26037	106	102	104	no	男	2013-04-19	2013-04-19	AGA（适于胎龄儿）	40	0	3510	足月儿	1982-10-13	30	1986-03-28	27	165	70	25.71	162	49	18.67	自然怀孕	顺产	其他	未保胎	无		1	1					8岁0月1天	8岁0月1天	8	8	2020-01-31	#REF!	注意力缺陷型	8	3	2	0	0	19	10
A26043	ZL26165	104	123	115	no	男	2013-10-11	2013-10-11	SGA（小于胎龄儿）	40	0	3600	足月儿	1985-02-05	28	1986-01-11	27	180	90	27.78	172	75	25.35	自然怀孕	顺产	无	未保胎	无		1	1					7岁6月11天	7岁6月11天	7.53	7.53	2020-01-31	#REF!	混合型	8	9	8	5	2	22	25
A26240	ZL26362	101	105	103	no	男	2011-03-23	2011-03-23	AGA（适于胎龄儿）	40	0	3000	足月儿	1984-03-26	27	1983-12-10	27							自然怀孕	剖宫产	无	未保胎	无		1	1					10岁1月3天	10岁1月3天	10.09	10.09	2020-01-31	#REF!	混合型	9	9	6	3	1	26	27
A26626	ZL26748	110	127	122	no	女	2014-07-22	2014-07-22	AGA（适于胎龄儿）	40	0	3350	足月儿	1987-05-04	27	1986-12-05	27																			6岁9月8天	6岁9月8天	6.77	6.77	2020-01-31	#REF!	注意力缺陷型	8	3	0	0	1	20	12
A26776	ZL26898	79.76		79.76	no	女	2013-09-19	2013-09-18	AGA（适于胎龄儿）	40	1	3080	足月儿	1985-12-05	27	1985-09-30	27	170	65	22.49	165	60	22.04	自然怀孕	顺产	无	孕早期保胎（怀孕前3月）	无		2	1					7岁7月14天	7岁7月14天	7.62	7.62	2020-01-31	#REF!	混合型	8	7	4	0	5	22	22
A28133	ZL28255	106	85	95	no	男	2013-08-12	2013-08-12	AGA（适于胎龄儿）	40	0	3330	足月儿	1985-10-20	27	1985-11-11	27							自然怀孕	剖宫产	无	孕早期保胎（怀孕前3月）	无		1	1					7岁9月9天	7岁9月9天	7.77	7.77	2020-01-31	#REF!	注意力缺陷型	4	3	2	1	0	11	8
A28546	ZL28668	87	108	96	no	男	2012-09-02	2012-08-28	LGA（大于胎龄儿）	40	5	4500	足月儿	1985-06-06	27	1985-02-16	27	178						自然怀孕	剖宫产	无		无		1	1					8岁8月26天	8岁8月26天	10.1699	10.17	2020-01-31	#REF!	注意力缺陷型	7	3	3	0	1	19	11
A29431	ZL29553	73	75	70	no	女	2011-07-28	2011-08-08	LGA（大于胎龄儿）	38	3	5600	足月儿	1980-08-19	30	1983-11-23	27	178	82	25.88	158	42	16.82							1	1					9岁10月14天	9岁10月14天	9.87	9.87	2020-01-31	#REF!	注意力缺陷型	9	1	2	0	3	26	5
A30758	ZL30879	76.78		76.78	no	男	2011-03-02	2011-02-16	SGA（小于胎龄儿）	42	0	6600	过期产儿	1986-12-08	24	1984-01-10	27	182	65	39.25	160	50	19.53	自然怀孕	剖宫产	无	未保胎	无		1	1					10岁3月27天	10岁3月27天	10.32	10.32	2020-01-31	#REF!	混合型	4	3	0	0	0	9	7
A31886	ZL32007	80.63		80.63	no	男	2013-01-19	2013-01-19	AGA（适于胎龄儿）	40	0	3000	足月儿	1986-08-10	26	1985-10-05	27	174		33.03	160		21.09	自然怀孕	顺产	无	未保胎	无		1	1					8岁5月21天	8岁5月21天	8.47	8.47	2020-01-31	#REF!	注意力缺陷型	3	1	0	0	1	12	9
A32976	ZL33097	84.36		84.36	no	男	2012-07-20	2012-07-20	AGA（适于胎龄儿）	40	0	3200	足月儿	1984-10-31	27	1985-05-05	27	170	60	20.76	160	58	22.66	自然怀孕	顺产	无	孕早期保胎（怀孕前3月）	无		1	1					9岁0月0天	9岁0月0天	9	9	2020-01-31	#REF!	混合型	7	8	6	0	2	22	25
A34124	ZL34245	85.98		85.98	no	男	2012-06-26	2012-06-29	SGA（小于胎龄儿）	39	4	2660	足月儿	1985-02-11	27	1984-09-27	27	171	75	25.65	160	55	21.48	自然怀孕	顺产	无	未保胎	无		1	1					9岁1月6天	9岁1月6天	9.1	9.1	2020-01-31	#REF!	注意力缺陷型	6	3	3	0	0	16	9
A35386	ZL35506	68.54		68.54	no	男	2016-08-01	2016-08-10	SGA（小于胎龄儿）	38	5	2550	足月儿	1985-10-22	30	1988-09-02	27	173	80	26.73	163	47	17.69	自然怀孕	剖宫产	无	孕早期保胎（怀孕前3月）	无		1	1					5岁0月12天	5岁0月12天	5.03	5.03	2020-01-31	#REF!	混合型	9	8	8	2	3	23	20
A40374	ZL40492	96.28		96.28	no	男	2016-08-05	2016-08-05	AGA（适于胎龄儿）	40	0	3000	足月儿	1991-11-29	24	1989-01-01	27	180	70	21.6	158	55	22.03	自然怀孕	顺产	缺氧窒息	孕早期保胎（怀孕前3月）	无		2	2					5岁2月6天	5岁2月6天	5.18	5.18	2020-01-31	#REF!	注意力缺陷型	8	1	0	0	0	17	8
A41813	ZL41931	100	82	90	no	男	2013-04-03	2013-04-03	SGA（小于胎龄儿）	40	0	2500	足月儿	1976-10-15	36	1985-12-05	27	181	95	29	167	65	23.31	自然怀孕	顺产	无	未保胎	无		1	1					8岁6月23天	8岁6月23天	8.56	8.56	2020-01-31	#REF!	混合型	8	6	3	0	0	24	19
A41926	ZL42044	89	94	91	no	男	2016-03-07	2016-03-07	AGA（适于胎龄儿）	40	0	3000	足月儿	1981-03-20	34	1988-04-03	27																			5岁8月8天	5岁8月8天	5.69	5.69	2020-01-31	#REF!	注意力缺陷型	6	2	5	1	1	17	10
A41951	ZL42069	101	101	102	no	男	2015-08-19	2015-09-17	AGA（适于胎龄儿）	35	6	2500	早产儿	1986-10-21	28	1987-11-16	27	181	75	22.89	167	62	22.23	人工授孕/试管婴儿	剖宫产	无	孕早期保胎（怀孕前3月）	无		1	2					6岁2月9天	6岁2月9天	6.19	6.19	2020-01-31	#REF!	混合型	9	9	5	0	0	25	23
A42598	ZL42716	107	120	116	no	女	2014-07-11	2014-07-11	LGA（大于胎龄儿）	40	0	6400	足月儿	1987-01-04	27	1987-01-09	27	177	78	24.9	157	51	20.69	自然怀孕	剖宫产	无	未保胎	无		2	1					7岁3月25天	7岁3月25天	7.32	7.32	2020-01-31	#REF!	多动冲动型	3	6	1	1	0	10	16
A43224	ZL43342	66	77	68	no	男	2016-03-13	2016-03-13	AGA（适于胎龄儿）	40	0	3000	足月儿	1986-03-08	30	1988-11-14	27	177	64	20.43	160	52	20.31	自然怀孕	顺产	无	未保胎	无		1	1					5岁8月2天	5岁8月2天	5.67	5.67	2020-01-31	#REF!	混合型	1	1	0	0	0	8	7
A43934	ZL44052	87	93	89	no	女	2015-07-20	2015-07-20	SGA（小于胎龄儿）	40	0	2500	足月儿	1984-07-11	31	1987-11-07	27	172	75	25.35	158	53	21.23	自然怀孕	剖宫产	无	未保胎	无		3	3					6岁4月4天	6岁4月4天	6.34	6.34	2020-01-31	#REF!	注意力缺陷型	4	1	2	0	0	15	10
A44323	ZL44441	111.65		111.65	no	男	2017-07-08	2017-07-08	AGA（适于胎龄儿）	40	0	4000	足月儿	1991-07-14	26	1989-10-18	27	172	70	23.66		60		自然怀孕	顺产	无	未保胎	无		1	1					4岁4月24天	4岁4月24天	4.4	4.4	2020-01-31	#REF!	混合型	2	2	0	0	0	8	6
A45990	ZL46108	89	90	89	no	男	2015-08-09	2015-08-09	AGA（适于胎龄儿）	40	0	3550	足月儿	1986-09-06	28	1987-09-21	27	177	100	31.92	164	70	26.03	自然怀孕	顺产	无	未保胎	无		1	1					6岁4月19天	6岁4月19天	6.39	6.39	2020-01-31	#REF!	混合型	7	5	1	0	0	20	16
A46262	ZL46380	96.07		96.07	no	男	2015-03-13	2015-03-27	LGA（大于胎龄儿）	38	0	5500	足月儿	1986-07-25	28	1987-05-06	27	176	72	23.24	168	58	20.55	自然怀孕	剖宫产	无	未保胎	无		1	1					6岁9月18天	6岁9月18天	6.8	6.8	2020-01-31	#REF!	多动冲动型	2	7	0	0	0	10	17
A46284	ZL46402	88	104	94	no	男	2014-06-11	2014-06-11	SGA（小于胎龄儿）	40	0	3600	足月儿	1984-10-24	29	1986-06-19	27	180	80	24.69	163	50	18.82	自然怀孕	剖宫产	无	未保胎	无		1	1					7岁6月20天	7岁6月20天	7.55	7.55	2020-01-31	#REF!	混合型	7	5	6	1	0	20	17
A46825	ZL46943	103	109	106	no	男	2016-03-24	2016-03-24	AGA（适于胎龄儿）	40	0	3800	足月儿	1992-03-25	24	1988-08-03	27	182	67.5	40.76	157	46	18.66	自然怀孕	顺产	无	孕早期保胎（怀孕前3月）	无		3	1					5岁9月17天	5岁9月17天	5.8	5.8	2020-01-31	#REF!	混合型	6	8	6	1	0	20	24
A47271	ZL47389	109	100	104	yes	男	2010-08-18	2010-08-18	AGA（适于胎龄儿）	40	0	4150	足月儿	1983-03-23	27	1982-10-04	27	176	70	22.6	156	53	21.78	自然怀孕	剖宫产	无	未保胎	无		2	1					11岁5月0天	11岁5月0天	11.42	11.42	2020-01-31	#REF!	混合型	8	7	6	0	0	22	19
A47292	ZL47410	98	100	99	no	男	2013-08-12	2013-08-12	SGA（小于胎龄儿）	40	0	2900	足月儿	1986-01-07	27	1986-06-28	27	175	64	41.8	154	55	23.19													8岁5月6天	8岁5月6天	8.43	8.43	2020-01-31	#REF!	混合型	8	8	5	0	0	23	20
A47385	ZL47503	93	101	96	no	男	2014-02-11	2014-02-26	AGA（适于胎龄儿）	37	6	3450	足月儿	1982-07-17	31	1986-11-01	27	172	55	18.59	160	60	23.44	自然怀孕	剖宫产	无	孕早期保胎（怀孕前3月）	有		2	1					7岁11月8天	7岁11月8天	7.94	7.94	2020-01-31	#REF!	混合型	9	4	1	0	1	25	16
A47806	ZL47924	89.15		89.15	no	男	2011-05-15	2011-05-15	AGA（适于胎龄儿）	40	0	3200	足月儿	1981-11-28	29	1983-08-25	27	181	90	274716.89	172	70	23.66	自然怀孕	顺产											10岁8月10天	10岁8月10天	10.69	10.69	2020-01-31	#REF!	混合型	8	3	0	0	0	20	13
A47848	ZL47966	84.57		84.57	no	女	2013-03-25	2013-03-21	AGA（适于胎龄儿）	40	4	3000	足月儿	1983-06-22	29	1985-07-01	27	170	60	20.76	160	46	17.97	自然怀孕	剖宫产	无	孕早期保胎（怀孕前3月）	有		1	1					8岁10月0天	8岁10月0天	8.83	8.83	2020-01-31	#REF!	混合型	8	5	3	1	0	20	15
A47864	ZL47982	134	104	123	no	男	2014-06-11	2014-06-18	AGA（适于胎龄儿）	39	0	3400	足月儿	1987-08-08	26	1987-03-21	27	178	55	17.36	158	50	20.03	自然怀孕	顺产	无	未保胎	无		1	1					7岁7月14天	7岁7月14天	7.62	7.62	2020-01-31	#REF!	注意力缺陷型	8	2	5	1	3	24	8
A50306	ZL50424	109	123	118	no	男	2014-08-27	2014-08-22	LGA（大于胎龄儿）	40	5	6960	足月儿	1972-12-26	41	1987-07-16	27	180	53	16.36	158	60	24.03	自然怀孕	剖宫产	其他	未保胎									7岁6月11天	7岁6月11天	7.53	7.53	2020-01-31	#REF!	注意力缺陷型	5	2	1	0	0	16	12
A52840	ZL52958	100	112	105	no	男	2014-06-18	2014-06-20	AGA（适于胎龄儿）	39	5	3450	足月儿	1987-02-12	27	1986-12-25	27	181	72	21.98	166	56	20.32	自然怀孕	剖宫产	无	未保胎	无		1	1					8岁0月12天	8岁0月12天	8.03	8.03	2020-01-31	#REF!	注意力缺陷型	5	4	1	0	0	13	12
A54240	ZL54357	95.93		95.93	no	男	2016-05-30	2016-06-20	SGA（小于胎龄儿）	37	0	2250	足月儿	1988-09-19	27	1988-09-25	27																			6岁1月21天	6岁1月21天	6.14	6.14	2020-01-31	#REF!	注意力缺陷型	1	0	0	0	0	10	7
A55935	ZL56052	100.06		100.06	no	男	2017-03-12	2017-03-05	AGA（适于胎龄儿）	41	0	3500	足月儿	1987-02-04	30	1989-11-10	27	173	55	18.38	155	56	23.31	自然怀孕	剖宫产	无	未保胎	无		1	2					5岁4月29天	5岁4月29天	5.41	5.41	2020-01-31	#REF!	多动冲动型	4	6	1	0	0	11	19
A57379	ZL57496	101	104	103	no	男	2012-10-29	2012-10-29	LGA（大于胎龄儿）	40	0	4200	足月儿	1984-06-12	28	1985-02-17	27	170	90	31.14	160	60	23.44	自然怀孕	剖宫产	无	未保胎	无		1	1					9岁9月27天	9岁9月27天	9.82	9.82	2020-01-31	#REF!	注意力缺陷型	5	1	1	1	0	18	7
A6418	ZL6545	96.98		96.98	no	男	2012-04-21	2012-04-29	AGA（适于胎龄儿）	38	6	2900	足月儿	1983-10-05	28	1984-12-27	27	178	80	25.25	156	55	45.2	自然怀孕	剖宫产	无	未保胎	无	未使用药物	1	1	人工喂养	0	否	1	8岁8月24天	8岁8月24天	8.73	8.73	2020-01-31	#REF!	注意力缺陷型	7	2	0	0	0	17	7
A7702	ZL7829	103.68		103.68	no	男	2011-01-31	2011-02-13	AGA（适于胎龄儿）	38	1	3740	足月儿	1981-03-28	29	1983-10-10	27	170	58	20.07	153	47	20.08	自然怀孕	剖宫产	无	孕早期保胎（怀孕前3月）	无	未使用药物	1	1	纯母乳喂养	11	否	1	9岁11月25天	9岁11月25天	9.99	9.99	2020-01-31	#REF!	注意力缺陷型	3	3	0	0	0	11	7
A9571	ZL9694	94	119	105	no	男	2013-07-25	2013-08-01	AGA（适于胎龄儿）	39	0	3300	足月儿	1985-10-23	27	1985-11-12	27	170	105	36.33	158	53	21.23	自然怀孕	剖宫产	其他	孕早期保胎（怀孕前3月）	无	未使用药物	4	1	混合喂养（配方奶为主）	4	否	2	8岁0月5天	8岁0月5天	8.01	8.01	2020-01-31	#REF!	注意力缺陷型	4	1	4	1	0	14	7
A9581	ZL9704	99.58		99.58	no	男	2012-08-22	2012-08-18	AGA（适于胎龄儿）	40	4	3400	足月儿	1985-04-12	27	1984-12-16	27	180	84	25.93	165	48	17.63	自然怀孕	剖宫产	无	未保胎	无	未使用药物	1	1	纯母乳喂养	24	否	0.5	8岁1月15天	8岁1月15天	8.12	8.12	2020-01-31	#REF!	混合型	7	5	2	0	2	17	14
A10674	ZL10797	84.08		84.08	no	男	2014-07-24	2014-08-07	AGA（适于胎龄儿）	38	0	2900	足月儿	1985-02-04	29	1986-12-28	28	172	72	24.34	160	44	17.19	自然怀孕	顺产	无	未保胎	无	未使用药物	1	1	混合喂养（母乳为主）	6	是	2	6岁1月30天	6岁1月30天	6.17	6.17	2020-01-31	#REF!	混合型	3	3	0	0	0	12	11
A10337	ZL10460	104	95	101	no	男	2012-05-03	2012-05-03	AGA（适于胎龄儿）	40	0	3235	足月儿	1982-09-29	29	1983-09-27	28	172	75	25.35	155	50.5	21.02	自然怀孕	剖宫产	无	未保胎	无	其他	2	1	纯母乳喂养	24	否	0.5	8岁5月26天	8岁5月26天	8.49	8.49	2020-01-31	#REF!	混合型	0	1	0	0	0	6	5
A10427	ZL10550	84	83	82	no	男	2015-08-01	2015-07-31	AGA（适于胎龄儿）	40	1	3450	足月儿	1982-08-13	32	1987-01-07	28	170	60	20.76	157	48	19.47	自然怀孕	剖宫产	无	未保胎	无	未使用药物	1	1	混合喂养（母乳为主）	11	否	1	5岁1月20天	5岁1月20天	5.14	5.14	2020-01-31	#REF!	混合型	5	8	2	0	0	16	17
A10598	ZL10721	125.02		125.02	no	男	2014-01-18	2014-01-19	AGA（适于胎龄儿）	39	6	3800	足月儿	1985-01-08	29	1985-02-06	28	180	90	27.78	167	57	20.44	自然怀孕	剖宫产	无	未保胎	无	未使用药物	1	1	混合喂养（母乳为主）	4	是	2	6岁8月5天	6岁8月5天	6.68	6.68	2020-01-31	#REF!	混合型	9	8	3	1	0	27	22
A10720	ZL10843	108.81		108.81	no	男	2013-07-22	2013-07-29	SGA（小于胎龄儿）	39	0	2050	足月儿	1985-03-01	28	1985-01-22	28	180	115	35.49	175	85	27.76	自然怀孕	顺产	无	未保胎	无	未使用药物	1	1	混合喂养（配方奶为主）	1	否	1	7岁2月2天	7岁2月2天	7.17	7.17	2020-01-31	#REF!	注意力缺陷型	2	1	4	0	0	11	8
A10743	ZL10866	100	101	101	no	女	2013-07-09	2013-07-09	AGA（适于胎龄儿）	40	0	3300	足月儿	1979-10-24	33	1985-05-30	28	172	65	21.97	172	65	43.94	自然怀孕	顺产	无	未保胎	无	未使用药物	1	1	混合喂养（母乳为主）	3	否	1	8岁6月1天	8岁6月1天	8.5	8.5	2020-01-31	#REF!	注意力缺陷型	4	2	0	0	1	14	5
A10992	ZL11115	71.64		71.64	no	女	2011-02-19	2011-02-05	AGA（适于胎龄儿）	42	0	3800	过期产儿	1978-08-01	32	1982-10-07	28	172	70	23.66	162	65	24.77	自然怀孕	顺产	无	未保胎	无	未使用药物	1	1	混合喂养（母乳为主）	4	否	0.5	9岁7月9天	9岁7月9天	9.61	9.61	2020-01-31	#REF!	混合型	6	4	3	0	0	17	13
A11130	ZL11253	107	93	102	no	男	2012-10-26	2012-11-08	AGA（适于胎龄儿）	38	1	3000	足月儿	1972-05-05	40	1984-07-06	28	170	80	27.68	169	56	19.61	自然怀孕	顺产	无	未保胎	无	未使用药物	2	1	混合喂养（母乳为主）	3	是	0.5	7岁11月13天	7岁11月13天	7.95	7.95	2020-01-31	#REF!	混合型	4	5	3	0	0	13	15
A11180	ZL11303	100	108	103	no	男	2011-05-10	2011-05-03	LGA（大于胎龄儿）	41	0	8200	足月儿	1974-12-17	36	1983-03-02	28	171	78	26.67	165	52	19.1	自然怀孕	剖宫产	无	未保胎	无	未使用药物	1	1	人工喂养	1	否	0.5	9岁6月1天	9岁6月1天	9.5	9.5	2020-01-31	#REF!	混合型	1	0	0	0	0	5	5
A11605	ZL11728	93	90	90	no	男	2014-10-18	2014-10-20	AGA（适于胎龄儿）	39	5	2950	足月儿	1987-04-10	27	1986-05-16	28	165	60	22.04	155	45	18.73	自然怀孕	顺产	无	未保胎	无	未使用药物	1	1	纯母乳喂养	10	否	0.5	5岁11月25天	5岁11月25天	5.99	5.99	2020-01-31	#REF!	注意力缺陷型	0	1	0	0	0	6	4
A11752	ZL11875	91	106	98	no	男	2011-10-27	2011-11-02	AGA（适于胎龄儿）	39	1	3800	足月儿	1983-09-20	28	1983-02-24	28	171	85	29.07	158	55	22.03	自然怀孕	剖宫产	无	孕早期保胎（怀孕前3月）	无	未使用药物	3	1	混合喂养（母乳为主）	6	是	1	8岁11月14天	8岁11月14天	8.96	8.96	2020-01-31	#REF!	注意力缺陷型	6	1	1	0	0	20	7
A11990	ZL12113	103	96	101	no	男	2013-02-22	2013-02-25	AGA（适于胎龄儿）	39	4	3300	足月儿	1985-08-07	27	1985-02-04	28	172	65	21.97	156	50	20.55	自然怀孕	顺产	无	未保胎	无	未使用药物	1	1	混合喂养（母乳为主）	6	否	0.5	7岁7月15天	7岁7月15天	7.62	7.62	2020-01-31	#REF!	注意力缺陷型	4	1	0	1	0	14	7
A12314	ZL12437	117	100	109	no	男	2015-06-01	2015-06-08	AGA（适于胎龄儿）	39	0	3880	足月儿	1969-01-15	46	1986-10-14	28	170	80	27.68	159	55	21.76	自然怀孕	顺产	无	未保胎	无	未使用药物	5	1	纯母乳喂养	24	否	0.5	5岁4月13天	5岁4月13天	5.37	5.37	2020-01-31	#REF!	混合型	8	8	5	0	0	23	25
A12614	ZL12737	109	93	102	no	男	2012-02-20	2012-02-20	AGA（适于胎龄儿）	40	0	3920	足月儿	1984-03-14	27	1983-05-19	28	176	85	27.44	169	55	19.26	自然怀孕	顺产	无	孕早期保胎（怀孕前3月）	无	未使用药物	2	1	纯母乳喂养	6	是	1	8岁8月8天	8岁8月8天	8.69	8.69	2020-01-31	#REF!	注意力缺陷型	6	4	2	0	0	17	11
A12746	ZL12869	93	96	94	no	男	2014-06-19	2014-06-19	SGA（小于胎龄儿）	40	0	3750	足月儿	1985-08-23	28	1986-02-28	28	177	122	38.94	160	45	17.58	自然怀孕	顺产	无	未保胎	无	未使用药物	1	1	混合喂养（母乳为主）	4	是	2.5	6岁5月18天	6岁5月18天	6.47	6.47	2020-01-31	#REF!	混合型	3	3	2	0	0	9	9
A13217	ZL13340	95	100	97	no	男	2010-04-02	2010-03-26	LGA（大于胎龄儿）	41	0	4950	足月儿	1980-06-18	29	1981-06-04	28	178	80	25.25	153	49	20.93	自然怀孕	剖宫产	无	孕早期保胎（怀孕前3月）	无	未使用药物	1	1	纯母乳喂养	6	是	2	10岁6月21天	10岁6月21天	10.56	10.56	2020-01-31	#REF!	混合型	9	6	7	0	0	27	18
A13231	ZL13354	87.41		87.41	no	男	2012-07-04	2012-07-07	AGA（适于胎龄儿）	39	4	2900	足月儿	1981-12-09	30	1983-11-23	28	181	70	21.37	161	60	23.15	自然怀孕	顺产	无	孕早期保胎（怀孕前3月）	无	未使用药物	1	1	人工喂养	8	否	2	8岁3月20天	8岁3月20天	8.3	8.3	2020-01-31	#REF!	混合型	5	7	2	0	0	13	16
A13343	ZL13466	103	96	101	no	女	2013-01-05	2013-01-16	AGA（适于胎龄儿）	38	3	3200	足月儿	1985-07-01	27	1984-03-13	28	181	88	26.86	166	77	27.94	自然怀孕	剖宫产	无	未保胎	无	未使用药物	1	1	纯母乳喂养	7	否	0.5	7岁9月21天	7岁9月21天	7.81	7.81	2020-01-31	#REF!	注意力缺陷型	5	0	0	0	0	15	4
A13387	ZL13510	52	82	63	no	男	2012-10-29	2012-10-29	AGA（适于胎龄儿）	40	0	3400	足月儿	1982-05-21	30	1984-02-03	28	170	78	26.99	160	48	18.75	自然怀孕	顺产	无	未保胎	无	未使用药物	3	1	纯母乳喂养	6	是	1	7岁11月28天	7岁11月28天	7.99	7.99	2020-01-31	#REF!	混合型	9	5	2	0	0	22	16
A13534	ZL13657	103	101	103	no	男	2014-08-11	2014-08-04	AGA（适于胎龄儿）	41	0	3908	足月儿	1979-06-12	35	1986-05-30	28	172	120	40.56	158	52	41.66	自然怀孕	顺产	无	未保胎	无	未使用药物	1	1	纯母乳喂养	5	否	0.5	6岁3月27天	6岁3月27天	6.32	6.32	2020-01-31	#REF!	混合型	1	1	0	1	1	7	7
A13761	ZL13884	73	89	77	no	男	2014-07-25	2014-08-09	AGA（适于胎龄儿）	37	6	3400	足月儿	1984-09-12	29	1986-02-15	28	180	105	324074.07	162	55	20.96	自然怀孕	顺产	无	未保胎	无	未使用药物	2	2	混合喂养（母乳为主）	6	是	2.5	6岁3月5天	6岁3月5天	6.26	6.26	2020-01-31	#REF!	混合型	9	9	3	0	0	26	27
A13794	ZL13917	68	107	86	no	男	2015-05-06	2015-05-06	AGA（适于胎龄儿）	40	0	3685	足月儿	1986-07-02	28	1986-10-17	28	174	74	24.44	165	51	18.73	自然怀孕	顺产	无	未保胎	无	未使用药物	1	1	混合喂养（配方奶为主）	7	是	1	5岁5月24天	5岁5月24天	5.48	5.48	2020-01-31	#REF!	混合型	1	2	0	0	0	8	8
A14285	ZL14408	110	113	112	no	男	2015-12-01	2015-12-15	AGA（适于胎龄儿）	38	0	2900	足月儿	1984-05-31	31	1987-11-22	28	168	78	27.64	160	50	19.53	自然怀孕	顺产	无	未保胎	无	未使用药物	1	1	混合喂养（母乳为主）	12	是	1	4岁11月4天	4岁11月4天	4.93	4.93	2020-01-31	#REF!	混合型	4	9	1	0	0	13	24
A14340	ZL14463	77	92	82	no	男	2012-01-04	2012-01-17	AGA（适于胎龄儿）	38	1	2820	足月儿	1984-10-28	27	1983-03-04	28	177	80	25.54	167	55	19.72	自然怀孕	剖宫产	无	未保胎	无	未使用药物	1	1	混合喂养（配方奶为主）	1	是	1	9岁6月16天	9岁6月16天	9.54	9.54	2020-01-31	#REF!	注意力缺陷型	8	2	3	1	2	22	11
A14473	ZL14596	84	104	92	no	男	2007-06-06	2007-06-20	SGA（小于胎龄儿）	38	0	2000	足月儿	1977-06-09	30	1979-02-12	28	170	70	24.22	160	55	21.48	自然怀孕	顺产	无	未保胎	无	未使用药物	1	1	纯母乳喂养	6	是	0.5	13岁5月0天	13岁5月0天	13.42	13.42	2020-01-31	#REF!	注意力缺陷型	3	1	0	0	0	12	6
A14783	ZL14906	101	117	109	no	男	2013-02-06	2013-02-06	AGA（适于胎龄儿）	40	0	3000	足月儿	1982-11-02	30	1985-02-09	28	172	70	23.66	168	55	19.49	自然怀孕	顺产	无	未保胎	有	降压药	1	1	纯母乳喂养	10	是	2	7岁9月4天	7岁9月4天	7.76	7.76	2020-01-31	#REF!	注意力缺陷型	5	3	0	0	0	13	9
A15629	ZL15751	89.72		89.72	no	男	2012-03-24	2012-03-31	AGA（适于胎龄儿）	39	0	2950	足月儿	1981-01-09	31	1983-07-25	28	180	80	24.69	166	55	19.96	自然怀孕	顺产	其他	未保胎	无		1	1					8岁7月26天	8岁7月26天	8.65	8.65	2020-01-31	#REF!	多动冲动型	2	3	2	1	0	10	14
A16769	ZL16891	91	100	94	no	女	2013-05-14	2013-05-14	LGA（大于胎龄儿）	40	0	4000	足月儿	1982-06-28	30	1984-06-02	28	176	90	29.05	167	65	23.31	自然怀孕	剖宫产	无	未保胎	无		1	1					7岁6月21天	7岁6月21天	7.56	7.56	2020-01-31	#REF!	注意力缺陷型	6	2	0	0	0	18	5
A16776	ZL16898	85.27		85.27	no	男	2011-11-28	2011-12-05	AGA（适于胎龄儿）	39	0	3400	足月儿	1988-10-19	23	1983-05-07	28	175	76	24.82	175	90	29.39	自然怀孕	剖宫产	无	未保胎	无		1	1					9岁0月6天	9岁0月6天	9.02	9.02	2020-01-31	#REF!	混合型	8	6	2	1	0	23	16
A17320	ZL17442	87.51		87.51	no	男	2013-08-30	2013-08-30	SGA（小于胎龄儿）	40	0	2900	足月儿	1981-07-24	32	1984-11-29	28	176	56	18.08	163															7岁3月12天	7岁3月12天	7.28	7.28	2020-01-31	#REF!	混合型	3	3	0	0	0	12	11
A17407	ZL17529	79	103	90	no	男	2016-09-05	2016-09-19	AGA（适于胎龄儿）	38	0	3100	足月儿	1987-11-28	28	1987-10-15	28	175	70	22.86	165	50	18.37	自然怀孕	剖宫产	无	未保胎	无		1	1					4岁5月16天	4岁5月16天	4.46	4.46	2020-01-31	#REF!	注意力缺陷型	5	3	0	0	0	14	11
A17605	ZL17727	114.7		114.7	no	男	2012-05-20	2012-05-14	SGA（小于胎龄儿）	40	6	2900	足月儿	1974-04-20	38	1983-07-04	28	169	75	26.26	158	52	20.83	自然怀孕	剖宫产	其他	未保胎	无		1	1					8岁6月27天	8岁6月27天	8.57	8.57	2020-01-31	#REF!	注意力缺陷型	4	2	4	0	0	15	9
A17850	ZL17972	89.02		89.02	no	男	2014-02-18	2014-02-18	AGA（适于胎龄儿）	40	0	3500	足月儿	1986-03-27	27	1985-11-30	28																			6岁10月1天	6岁10月1天	6.84	6.84	2020-01-31	#REF!	注意力缺陷型	7	4	7	1	3	22	11
A18603	ZL18725	92.83		92.83	no	男	2014-07-18	2014-07-08	AGA（适于胎龄儿）	41	3	3740	足月儿	1977-07-08	37	1985-12-21	28	176	85	27.44	165	60	22.04	自然怀孕	顺产	无	未保胎	无		1	1					6岁5月11天	6岁5月11天	6.45	6.45	2020-01-31	#REF!	混合型	4	7	1	0	0	14	21
A18664	ZL18786	70	77	70	no	男	2014-07-02	2014-07-02	LGA（大于胎龄儿）	40	0	4420	足月儿	1985-01-23	29	1986-04-14	28	179												1	1					7岁6月8天	7岁6月8天	7.52	7.52	2020-01-31	#REF!	混合型	3	2	3	0	0	9	8
A18685	ZL18807	89	116	102	no	男	2016-06-21	2016-06-21	AGA（适于胎龄儿）	40	0	3100	足月儿	1983-04-30	33	1987-09-20	28							自然怀孕	剖宫产	无	未保胎	无		2	2					4岁8月19天	4岁8月19天	4.72	4.72	2020-01-31	#REF!	混合型	7	6	2	1	0	21	18
A18712	ZL18834	102	117	110	no	男	2011-07-29	2011-08-05	AGA（适于胎龄儿）	39	0	3200	足月儿	1979-06-29	32	1982-09-22	28	175	75	24.49	170	70	24.22	自然怀孕	顺产	无										9岁5月2天	9岁5月2天	9.42	9.42	2020-01-31	#REF!	混合型	6	5	2	0	0	18	17
A18790	ZL18912	100	117	108	no	男	2013-04-09	2013-04-09	SGA（小于胎龄儿）	40	0	2950	足月儿	1977-10-11	35	1984-12-17	28	180	70	21.6		50		自然怀孕	剖宫产											7岁8月22天	7岁8月22天	7.73	7.73	2020-01-31	#REF!	注意力缺陷型	5	2	0	0	0	14	6
A20830	ZL20952	113	106	112	yes	男	2009-12-28	2009-12-28	AGA（适于胎龄儿）	40	0	3200	足月儿	1980-06-28	29	1981-12-25	28	175	72	23.51	165	55	20.2	自然怀孕	顺产	无	未保胎	无		1	1					11岁1月9天	11岁1月9天	11.11	11.11	2020-01-31	#REF!	混合型	9	6	7	1	1	24	18
A21788	ZL21910	66	83	71	no	女	2013-12-25	2014-01-16	AGA（适于胎龄儿）	36	6	3070	早产儿	1981-06-06	32	1985-05-19	28	163	50	18.82	162	50	19.05	自然怀孕	顺产	无	未保胎	无		1	1					7岁4月24天	7岁4月24天	7.4	7.4	2020-01-31	#REF!	注意力缺陷型	9	2	2	0	0	20	11
A22163	ZL22285	64	74	65	no	男	2016-05-05	2016-05-07	AGA（适于胎龄儿）	39	5	3100	足月儿	1988-03-08	28	1987-09-22	28	175	69	22.53	164	62	23.05	自然怀孕	剖宫产	无	孕早期保胎（怀孕前3月）	无		1	1					4岁9月30天	4岁9月30天	4.83	4.83	2020-01-31	#REF!	混合型	8	5	1	0	0	21	15
A22352	ZL22474	119	105	115	no	男	2012-08-15	2012-08-14	AGA（适于胎龄儿）	40	1	3550	足月儿	1984-01-24	28	1983-11-16	28	180	75	23.15	156	50	20.55	自然怀孕	顺产	无	未保胎	无		1	1					8岁6月23天	8岁6月23天	8.56	8.56	2020-01-31	#REF!	多动冲动型	3	4	0	0	0	12	13
A22518	ZL22640	104	119	113	no	男	2012-08-04	2012-08-30	AGA（适于胎龄儿）	36	2	2600	早产儿	1980-12-01	31	1983-10-14	28							自然怀孕	剖宫产	无	未保胎	无								8岁7月5天	8岁7月5天	8.6	8.6	2020-01-31	#REF!	注意力缺陷型	8	1	0	1	5	24	7
A25821	ZL25943	138.43		138.43	yes	女	2010-04-14	2010-04-21	AGA（适于胎龄儿）	39	0	3100	足月儿	1982-05-25	27	1981-09-14	28	174	70	23.12	156	61	25.07	自然怀孕	剖宫产	无	孕早期保胎（怀孕前3月）	无		1	1					11岁0月15天	11岁0月15天	11.04	11.04	2020-01-31	#REF!	注意力缺陷型	7	3	4	0	0	22	12
A26366	ZL26488	53	63	56	no	男	2015-10-11	2015-10-11	AGA（适于胎龄儿）	40	0	3000	足月儿	1989-12-24	25	1987-08-25	28	172	56	18.93	158	55	22.03	自然怀孕	剖宫产	无	未保胎	无		1	1					5岁6月16天	5岁6月16天	5.54	5.54	2020-01-31	#REF!	混合型	7	4	1	0	0	19	14
A27205	ZL27327	122	119	125	no	男	2014-04-30	2014-05-07	AGA（适于胎龄儿）	39	0	3200	足月儿	1985-10-21	28	1985-08-21	28	169	73	25.56	153	48	20.5	自然怀孕	剖宫产	其他	未保胎	无		1	1					7岁0月7天	7岁0月7天	7.02	7.02	2020-01-31	#REF!	注意力缺陷型	7	4	1	0	0	17	12
A27326	ZL27448	100	108	103	no	男	2013-07-10	2013-07-10	AGA（适于胎龄儿）	40	0	3250	足月儿	1984-12-24	28	1985-06-29	28	166	80	29.03	150	65	28.89	自然怀孕	顺产	无	孕早期保胎（怀孕前3月）	无		1	1					7岁11月6天	7岁11月6天	7.93	7.93	2020-01-31	#REF!	注意力缺陷型	5	1	3	0	1	15	7
A27525	ZL27647	98	105	102	no	女	2013-05-12	2013-05-12	AGA（适于胎龄儿）	40	0	3020	足月儿	1982-11-15	30	1984-10-01	28	182	75	45.28	158	45	36.05	自然怀孕	顺产	无	未保胎	无		1	1					8岁0月1天	8岁0月1天	8	8	2020-01-31	#REF!	混合型	3	9	6	0	0	15	22
A27615	ZL27737	104	95	101	no	男	2012-08-22	2012-08-22	AGA（适于胎龄儿）	40	0	3520	足月儿	1979-12-02	32	1984-04-05	28	175	75	24.49	162	60	22.86			无	未保胎	无		2	1					8岁8月23天	8岁8月23天	8.73	8.73	2020-01-31	#REF!	混合型	4	5	5	1	0	14	13
A27703	ZL27825	91.11		91.11	yes	男	2010-01-12	2010-01-12	AGA（适于胎龄儿）	40	0	3800	足月儿	1982-02-01	27	1981-07-05	28	176	24	7.75	165	22	8.08	自然怀孕	剖宫产	无	未保胎	无		2	1					11岁7月2天	11岁7月2天	11.59	11.59	2020-01-31	#REF!	注意力缺陷型	3	2	2	0	1	12	8
A28289	ZL28411	107	112	111	no	男	2014-07-04	2014-07-10	AGA（适于胎龄儿）	39	1	3330	足月儿	1978-06-30	36	1986-03-21	28	181	75	22.89	161	52	20.06	自然怀孕	剖宫产	无	孕早期保胎（怀孕前3月）	无		2	1					6岁10月20天	6岁10月20天	6.89	6.89	2020-01-31	#REF!	混合型	4	4	0	0	0	12	10
A31156	ZL31277	106	127	119	no	男	2011-12-19	2012-01-02	AGA（适于胎龄儿）	38	0	3575	足月儿	1981-02-02	30	1983-05-16	28	184	85	25.11	165	46	16.9	自然怀孕	顺产	无	未保胎	无		2	1					9岁6月14天	9岁6月14天	9.54	9.54	2020-01-31	#REF!	注意力缺陷型	5	1	0	0	0	14	5
A32792	ZL32913	106	114	111	no	男	2017-11-12	2017-11-13	SGA（小于胎龄儿）	39	6	3800	足月儿	1980-07-11	37	1988-12-22	28								剖宫产	无	未保胎	无		3	1					4岁	4岁	4	4	2020-01-31	#REF!	混合型	5	4	1	3	0	14	13
A33411	ZL33532	98.57		98.57	no	女	2017-11-10	2017-11-10	AGA（适于胎龄儿）	40	0	3550	足月儿	1990-08-22	27	1989-06-03	28	178	86	27.14	155	55.2	22.98	自然怀孕	剖宫产	无	未保胎	无		2	1					4岁	4岁	4	4	2020-01-31	#REF!	混合型	5	6	1	0	0	18	14
A33517	ZL33638	92	101	95	no	男	2013-03-27	2013-03-27	AGA（适于胎龄儿）	40	0	3200	足月儿	1982-06-01	30	1984-11-27	28	168	120	42.52	158	48	19.23	自然怀孕	剖宫产	无	未保胎			1						8岁3月30天	8岁3月30天	8.33	8.33	2020-01-31	#REF!	混合型	4	7	8	2	2	14	20
A34013	ZL34134	77.09		77.09	no	男	2010-08-28	2010-08-28	AGA（适于胎龄儿）	40	0	3400	足月儿	1977-01-21	33	1982-01-01	28																			10岁11月2天	10岁11月2天	10.92	10.92	2020-01-31	#REF!	混合型	8	6	6	1	0	21	17
A34811	ZL34932	74	83	76	no	男	2013-07-29	2013-07-29	AGA（适于胎龄儿）	40	0	4000	足月儿	1977-05-10	36	1985-08-01	28	155	60	24.97	150	70	31.11	自然怀孕	顺产	无	未保胎	无		3	3					8岁0月11天	8岁0月11天	8.03	8.03	2020-01-31	#REF!	混合型	7	9	5	6	0	22	27
A35536	ZL35656	80.05		80.05	no	男	2018-01-30	2018-02-23	AGA（适于胎龄儿）	36	4	2540	早产儿	1989-03-04	28	1989-08-17	28	175	60	19.59	165	70	25.71	自然怀孕	剖宫产	无	孕早期保胎（怀孕前3月）	有		1	1					4岁0月1天	4岁0月1天	4	4	2020-01-31	#REF!	混合型	1	0	0	0	0	6	8
A35728	ZL35848	89	98	92	no	男	2010-11-21	2010-12-05	SGA（小于胎龄儿）	38	0	2400	足月儿	1983-07-02	27	1982-08-27	28	178	80	50.5	158	49	39.26	自然怀孕	剖宫产	无	未保胎	无		1	1					10岁8月27天	10岁8月27天	10.74	10.74	2020-01-31	#REF!	混合型	9	5	1	1	0	25	17
A37289	ZL37409	48	74	58	no	男	2014-10-06	2014-09-15	AGA（适于胎龄儿）	43	0	3600	过期产儿	1983-10-28	30	1986-06-10	28	176	80	25.83	164	52	19.33	自然怀孕	顺产					1	1					6岁10月28天	6岁10月28天	6.91	6.91	2020-01-31	#REF!	混合型	9	7	5	0	2	23	21
A38047	ZL38167	87.25		87.25	no	女	2012-02-06	2012-02-13	AGA（适于胎龄儿）	39	0	3900	足月儿	1979-11-15	32	1983-07-08	28	180	75	23.15	175	81	26.45	自然怀孕	剖宫产	无	未保胎	无		1	1					9岁7月7天	9岁7月7天	9.6	9.6	2020-01-31	#REF!	注意力缺陷型	0	0	0	0	0	6	1
A40020	ZL40138	74.87		74.87	no	男	2012-10-28	2012-10-28	SGA（小于胎龄儿）	40	0	5800	足月儿	1982-02-02	30	1984-09-09	28	170	95	65.74	160	58	45.31	自然怀孕	剖宫产	缺氧窒息	未保胎	无								8岁11月10天	8岁11月10天	8.94	8.94	2020-01-31	#REF!	注意力缺陷型	4	1	0	0	0	13	6
A41496	ZL41614	80	70	72	no	男	2015-01-29	2015-01-29	AGA（适于胎龄儿）	40	0	3715	足月儿	1982-10-13	32	1986-03-25	28	182	100	30.19	168	60	21.26	自然怀孕	剖宫产	其他	未保胎	无		2	2					6岁8月24天	6岁8月24天	6.73	6.73	2020-01-31	#REF!	多动冲动型	1	2	0	0	0	5	8
A41574	ZL41692	89	95	90	no	男	2012-08-28	2012-08-28	AGA（适于胎龄儿）	40	0	3300	足月儿	1984-11-12	27	1984-01-26	28	181	75	22.89	160	49	19.14	自然怀孕	剖宫产	无	未保胎	无		1	1					9岁1月26天	9岁1月26天	9.15	9.15	2020-01-31	#REF!	注意力缺陷型	6	2	0	0	0	16	11
A43706	ZL43824	91	102	95	no	女	2013-06-30	2013-06-30	AGA（适于胎龄儿）	40	0	3160	足月儿	1968-07-09	45	1984-09-29	28	178	70	22.09	165	60	22.04	自然怀孕	顺产	无	未保胎			1	1					8岁4月21天	8岁4月21天	8.39	8.39	2020-01-31	#REF!	注意力缺陷型	6	4	2	0	0	18	12
A44172	ZL44290	95	115	104	no	男	2013-12-27	2013-12-27	AGA（适于胎龄儿）	40	0	3500	足月儿	1988-03-12	25	1986-01-01	28	174	65	42.94	157	60	48.68	自然怀孕	剖宫产	无		无								7岁11月2天	7岁11月2天	7.92	7.92	2020-01-31	#REF!	混合型	1	1	0	0	0	10	8
A45924	ZL46042	81	92	84	no	男	2014-10-23	2014-10-23	SGA（小于胎龄儿）	40	0	3300	足月儿	1984-09-12	30	1985-12-10	28	170	75	25.95	165	55	20.2	自然怀孕	顺产	无	未保胎,孕早期保胎（怀孕前3月）,孕中期保胎（怀孕4-6月）	无		1	1					7岁2月3天	7岁2月3天	7.17	7.17	2020-01-31	#REF!	混合型	6	5	6	1	0	17	16
A47530	ZL47648	98	136	117	no	男	2014-10-16	2014-10-18	AGA（适于胎龄儿）	39	5	3200	足月儿	1985-09-15	29	1986-01-15	28	179.5	75	23.28	158	58	23.23	自然怀孕	顺产	无	未保胎	无		1	1					7岁3月5天	7岁3月5天	7.26	7.26	2020-01-31	#REF!	混合型	8	5	3	0	2	20	14
A4647	ZL4774	69.92		69.92	yes	男	2009-12-14	2009-12-28	AGA（适于胎龄儿）	38	0	3050	足月儿	1979-06-18	30	1981-09-18	28	175	99	32.33	165	51.8	19.03	自然怀孕	顺产	无	未保胎	无	未使用药物	1	1	混合喂养（母乳为主）	8	否	0	11岁1月5天	11岁1月5天	11.1	11.1	2020-01-31	#REF!	注意力缺陷型	3	2	0	0	0	13	9
A47685	ZL47803	104	104	104	no	男	2014-04-02	2014-04-14	LGA（大于胎龄儿）	38	2	3815	足月儿	1983-09-25	30	1985-07-31	28	187	110	31.46	167	60	21.51	自然怀孕	剖宫产	无	未保胎	无		2	1					7岁9月21天	7岁9月21天	7.81	7.81	2020-01-31	#REF!	注意力缺陷型	4	2	1	0	0	13	9
A48111	ZL48229	111.67		111.67	no	男	2009-01-31	2009-01-22	AGA（适于胎龄儿）	41	2	3650	足月儿	1981-02-05	28	1981-02-04	28	178	72	22.72	161	55	21.22	自然怀孕	剖宫产	无	未保胎	无		2	1					12岁11月28天	12岁11月28天	12.99	12.99	2020-01-31	#REF!	注意力缺陷型	4	0	2	0	0	13	6
A51494	ZL51612	73.44		73.44	no	男	2012-09-17	2012-09-17	AGA（适于胎龄儿）	40	0	3900	足月儿	1981-11-07	30	1983-11-12	28	170	60	20.76	162	52	19.81	自然怀孕	顺产	无	未保胎	无		1	1					9岁8月23天	9岁8月23天	9.73	9.73	2020-01-31	#REF!	混合型	8	6	7	1	0	20	18
A57314	ZL57431	56	77	63	no	男	2014-04-16	2014-04-16	AGA（适于胎龄儿）	40	0	3350	足月儿	1986-09-04	27	1986-04-12	28																			8岁4月9天	8岁4月9天	8.36	8.36	2020-01-31	#REF!	混合型	8	5	0	0	3	23	14
A57946	ZL58063	104	95	101	no	男	2014-09-11	2014-09-11	SGA（小于胎龄儿）	40	0	4350	足月儿	1984-08-02	30	1986-05-17	28	173	75	25.06	165	60	22.04	自然怀孕	顺产	无	未保胎	无		4	2					7岁11月19天	7岁11月19天	7.97	7.97	2020-01-31	#REF!	混合型	4	6	2	1	0	13	19
A59941	ZL60058	110.79		110.79	no	男	2012-08-25	2012-08-26	LGA（大于胎龄儿）	39	6	5260	足月儿	1975-02-04	37	1984-08-04	28	178	78	24.62	162	59	22.48	自然怀孕	顺产	无	未保胎	无		2	2					10岁1月1天	10岁1月1天	10.09	10.09	2020-01-31	#REF!	注意力缺陷型	4	4	3	1	1	15	12
A6406	ZL6533	81	96	86	no	男	2011-11-20	2011-11-15	AGA（适于胎龄儿）	40	5	3400	足月儿	1982-10-21	29	1983-05-23	28	180	74	22.84	170	70	24.22	自然怀孕	顺产	其他	未保胎	无	未使用药物	2	1	纯母乳喂养	6	否	0.5	8岁8月11天	8岁8月11天	8.7	8.7	2020-01-31	#REF!	注意力缺陷型	5	2	0	0	0	14	8
A6465	ZL6592	102	106	104	no	男	2012-12-22	2012-12-20	AGA（适于胎龄儿）	40	2	3500	足月儿	1982-04-16	30	1984-11-15	28	181.5	88	26.71	162.5	62.5	23.67	自然怀孕	顺产	无	未保胎	无	未使用药物	1	1	纯母乳喂养	6	是	1	7岁11月22天	7岁11月22天	7.98	7.98	2020-01-31	#REF!	注意力缺陷型	5	2	1	0	0	13	8
A66290	ZL66397	116	115	119	no	男	2012-07-15	2012-07-29	AGA（适于胎龄儿）	38	0	3100	足月儿	1981-10-01	30	1984-04-26	28	176	75	24.21	165	62	22.77	自然怀孕	顺产					1	1					10岁6月4天	10岁6月4天	10.51	10.51	2020-01-31	#REF!	混合型	0	2	0	0	1	8	7
A7660	ZL7787	69.15		69.15	no	男	2011-05-18	2011-05-18	AGA（适于胎龄儿）	40	0	3400	足月儿	1981-09-02	29	1982-10-29	28	168	52	18.42	158	53	21.23	自然怀孕	剖宫产	无	孕早期保胎（怀孕前3月）,孕中期保胎（怀孕4-6月）	无	未使用药物	3	1	纯母乳喂养	10	否	5	9岁4月10天	9岁4月10天	9.36	9.36	2020-01-31	#REF!	混合型	8	4	3	0	1	22	14
A8008	ZL8135	89	95	90	no	男	2011-10-22	2011-12-07	AGA（适于胎龄儿）	33	3	2250	早产儿	1982-11-27	28	1982-11-19	28	177	80	25.54	165	59	21.67	自然怀孕	顺产	无	孕中期保胎（怀孕4-6月）	无	未使用药物	1	1	混合喂养（配方奶为主）	9	是	3	9岁8月28天	9岁8月28天	9.74	9.74	2020-01-31	#REF!	注意力缺陷型	3	0	0	0	1	10	2
A8898	ZL9025	98.65		98.65	no	女	2013-06-28	2013-07-12	AGA（适于胎龄儿）	38	0	3200	足月儿	1982-11-14	30	1984-12-22	28	171	97	33.17	158	64	25.64	自然怀孕	剖宫产	无	未保胎	无	未使用药物	2	1	纯母乳喂养	12	是	2	7岁2月7天	7岁2月7天	7.19	7.19	2020-01-31	#REF!	混合型	2	1	0	0	0	11	9
A9662	ZL9785	60	55	56	no	男	2014-01-06	2014-01-25	AGA（适于胎龄儿）	37	2	2850	足月儿	1983-07-28	30	1985-10-05	28	164	68	25.28	153	51	43.57	自然怀孕	顺产	无	未保胎	无	其他	1	1	纯母乳喂养	9	是	1	6岁8月7天	6岁8月7天	6.69	6.69	2020-01-31	#REF!	混合型	8	5	3	0	0	21	16
A10058	ZL10181	84.64		84.64	no	男	2010-11-26	2010-12-10	AGA（适于胎龄儿）	38	0	3100	足月儿	1981-07-04	29	1981-10-19	29	178	90	28.41	160	55	21.48	自然怀孕	顺产	无	未保胎	无	其他	2	2	混合喂养（配方奶为主）	0	否	1	9岁10月6天	9岁10月6天	9.85	9.85	2020-01-31	#REF!	注意力缺陷型	3	3	6	0	3	12	9
A10686	ZL10809	62	90	73	no	男	2013-11-22	2013-11-22	AGA（适于胎龄儿）	40	0	4050	足月儿	1984-10-04	29	1984-09-08	29	181	90	27.47	164	75	55.77	自然怀孕	剖宫产	无	未保胎	无	未使用药物	1	1	混合喂养（配方奶为主）	1	否	1	6岁10月2天	6岁10月2天	6.84	6.84	2020-01-31	#REF!	注意力缺陷型	5	3	0	0	0	15	12
A10773	ZL10896	80.34		80.34	no	男	2013-07-11	2013-07-31	SGA（小于胎龄儿）	37	1	2350	足月儿	1980-08-25	32	1983-07-31	29	160	62	242187.5	161	72	277767.06	自然怀孕	剖宫产	无	未保胎	有	未使用药物	1	1	混合喂养（母乳为主）	2	否	1.5	7岁2月13天	7岁2月13天	7.2	7.2	2020-01-31	#REF!	混合型	5	7	0	0	0	14	16
A11389	ZL11512	102.59		102.59	no	男	2014-03-17	2014-03-10	SGA（小于胎龄儿）	41	0	2835	足月儿	1982-05-13	31	1984-11-07	29	172	66	22.31	158	52.5	21.03	自然怀孕	剖宫产	无	未保胎	无	未使用药物	2	1	混合喂养（配方奶为主）	0	是	5	6岁6月19天	6岁6月19天	6.55	6.55	2020-01-31	#REF!	混合型	1	2	1	0	1	5	6
A11493	ZL11616	98	119	108	no	男	2013-01-02	2012-12-26	AGA（适于胎龄儿）	41	0	3350	足月儿	1984-10-24	28	1983-09-15	29	184	70	20.68	159	40	15.82	自然怀孕	剖宫产	无	未保胎	无	未使用药物	1	1	纯母乳喂养	6	否	1	7岁9月4天	7岁9月4天	7.76	7.76	2020-01-31	#REF!	注意力缺陷型	9	2	0	0	0	25	10
A11547	ZL11670	82.87		82.87	no	男	2008-08-18	2008-08-25	SGA（小于胎龄儿）	39	0	2500	足月儿	1978-04-05	30	1979-06-07	29	185	90	26.3	158	49	19.63	自然怀孕	顺产	无	未保胎	无	未使用药物	1	1	混合喂养（母乳为主）	10	否	1	12岁1月19天	12岁1月19天	12.14	12.14	2020-01-31	#REF!	注意力缺陷型	9	1	1	2	6	19	5
A11715	ZL11838	91	90	89	no	男	2013-03-08	2013-03-22	AGA（适于胎龄儿）	38	0	2600	足月儿	1983-05-02	29	1984-02-22	29	178	75	23.67	158	55	22.03	自然怀孕	顺产	无	未保胎	无	未使用药物	1	1	纯母乳喂养	7	否	2	7岁6月30天	7岁6月30天	7.58	7.58	2020-01-31	#REF!	混合型	7	6	1	2	0	16	18
A11750	ZL11873	81.37		81.37	no	男	2009-11-12	2009-11-19	AGA（适于胎龄儿）	39	0	3950	足月儿	1977-12-01	31	1980-05-20	29	170	75	25.95	162	75	28.58	自然怀孕	剖宫产	无	未保胎	有	未使用药物	1	1	人工喂养	0	否	3	10岁10月26天	10岁10月26天	10.9	10.9	2020-01-31	#REF!	多动冲动型	5	4	3	0	0	11	13
A11813	ZL11936	111	96	104	no	男	2014-01-26	2014-03-23	AGA（适于胎龄儿）	32	0	2100	早产儿	1982-08-04	31	1984-03-14	29	176	80	25.83	160	50	19.53	自然怀孕	顺产	无	孕早期保胎（怀孕前3月）	无	未使用药物	3	1	纯母乳喂养	6	是	1.5	6岁8月13天	6岁8月13天	6.7	6.7	2020-01-31	#REF!	混合型	2	3	0	0	0	8	10
A11877	ZL12000	77.39		77.39	no	女	2011-05-05	2011-05-05	AGA（适于胎龄儿）	40	0	3300	足月儿	1979-11-05	31	1982-04-17	29	180	57	17.59	162	56	21.34	自然怀孕	剖宫产	无	未保胎	无	未使用药物	1	1	混合喂养（配方奶为主）	2	否	0.5	9岁6月8天	9岁6月8天	9.52	9.52	2020-01-31	#REF!	注意力缺陷型	8	2	0	0	3	23	11
A11965	ZL12088	78	85	78	no	男	2014-02-04	2014-02-13	AGA（适于胎龄儿）	38	5	3600	足月儿	1983-10-09	30	1985-01-31	29	180	80	24.69	155	45	18.73	自然怀孕	剖宫产	无	未保胎	无	未使用药物	1	1	纯母乳喂养	6	是	0	6岁8月5天	6岁8月5天	6.68	6.68	2020-01-31	#REF!	注意力缺陷型	6	2	0	0	0	15	8
A11999	ZL12122	71	97	82	no	女	2015-09-26	2015-09-26	AGA（适于胎龄儿）	40	0	3500	足月儿	1984-10-01	31	1986-05-05	29	180	75	23.15	157	57.5	46.66	自然怀孕	顺产	无	未保胎	无	未使用药物	1	1	混合喂养（配方奶为主）	1	否	2	5岁0月14天	5岁0月14天	5.04	5.04	2020-01-31	#REF!	混合型	7	4	3	0	1	16	13
A12432	ZL12555	113	119	119	no	男	2013-09-20	2013-09-20	AGA（适于胎龄儿）	40	0	3300	足月儿	1983-02-14	30	1983-10-10	29	174	78	25.76	164	60	22.31	自然怀孕	顺产	无	未保胎	无	未使用药物	1	1	纯母乳喂养	12	是	0.5	7岁0月25天	7岁0月25天	7.07	7.07	2020-01-31	#REF!	混合型	9	8	7	0	3	24	22
A12601	ZL12724	88	80	82	no	男	2013-02-12	2013-03-05	AGA（适于胎龄儿）	37	0	2500	足月儿	1977-03-06	35	1983-05-10	29	170	70	24.22	160	60	23.44	自然怀孕	顺产	无	未保胎	无	未使用药物	2	1	混合喂养（配方奶为主）	0	否	1	7岁8月5天	7岁8月5天	7.68	7.68	2020-01-31	#REF!	多动冲动型	2	4	0	0	0	11	13
A13149	ZL13272	102.2		102.2	no	男	2013-08-15	2013-08-29	LGA（大于胎龄儿）	38	0	4200	足月儿	1972-06-14	41	1984-06-25	29	175	75	24.49	160	68	26.56	自然怀孕	剖宫产	无	未保胎	无	未使用药物	2	1	纯母乳喂养	10	否	1	7岁2月8天	7岁2月8天	7.19	7.19	2020-01-31	#REF!	注意力缺陷型	6	1	1	0	0	16	6
A13150	ZL13273	87	106	95	yes	男	2009-08-02	2009-08-16	AGA（适于胎龄儿）	38	0	3300	足月儿	1975-04-23	34	1979-09-27	29	175	77	25.14	165	55	20.2	自然怀孕	剖宫产	无	未保胎	无	未使用药物	1	1	混合喂养（母乳为主）	8	否	0	11岁2月21天	11岁2月21天	11.22	11.22	2020-01-31	#REF!	注意力缺陷型	9	1	0	0	1	26	4
A13224	ZL13347	93	70	80	yes	男	2009-10-10	2009-10-24	SGA（小于胎龄儿）	38	0	1875	足月儿	1979-04-19	30	1980-06-10	29	173	60	20.05	173	70	23.39	自然怀孕	剖宫产	无	未保胎	无	未使用药物	1	1	混合喂养（母乳为主）	6	是	1	11岁2月16天	11岁2月16天	11.21	11.21	2020-01-31	#REF!	注意力缺陷型	6	4	4	0	1	16	11
A13303	ZL13426	47	53	<45	no	男	2017-02-01	2017-02-20	AGA（适于胎龄儿）	37	2	3450	足月儿	1988-01-08	29	1987-12-15	29	182	110	33.21	175	64	20.9	自然怀孕	剖宫产	其他	未保胎	无	未使用药物	1	1	混合喂养（母乳为主）	8	是	0.5	4岁	4岁	4	4	2020-01-31	#REF!	混合型	7	4	3	0	2	19	14
A13841	ZL13964	100	101	101	no	男	2013-08-06	2013-08-13	LGA（大于胎龄儿）	39	0	4500	足月儿	1977-02-28	36	1984-06-29	29	168	62	21.97	150	52.5	46.67	自然怀孕	顺产	无	未保胎	无	未使用药物	1	1	纯母乳喂养	6	是	0.5	7岁2月24天	7岁2月24天	7.23	7.23	2020-01-31	#REF!	注意力缺陷型	6	0	1	0	0	16	5
A13857	ZL13980	74.25		74.25	no	男	2010-04-13	2010-05-04	AGA（适于胎龄儿）	37	0	3350	足月儿	1977-11-05	32	1980-05-10	29	175	70	22.86	160	75	29.3	自然怀孕	顺产	无	未保胎	无	未使用药物	1	1	人工喂养	0	否	5	10岁6月17天	10岁6月17天	10.55	10.55	2020-01-31	#REF!	混合型	5	4	0	0	0	18	15
A14146	ZL14269	119	104	114	no	女	2013-03-19	2013-03-12	AGA（适于胎龄儿）	41	0	3860	足月儿	1983-01-09	30	1983-10-02	29	170	70	24.22	160	50	19.53	自然怀孕	顺产	无	未保胎	无	未使用药物	1	1	混合喂养（配方奶为主）	1	否	0	7岁7月16天	7岁7月16天	7.63	7.63	2020-01-31	#REF!	注意力缺陷型	8	2	7	0	0	18	12
A14247	ZL14370	111.49		111.49	no	男	2006-10-26	2006-10-12	AGA（适于胎龄儿）	42	0	3700	过期产儿	1973-12-06	32	1977-04-27	29	175	100	32.65	164	62	23.05	自然怀孕	顺产	其他	未保胎	无	未使用药物	1	1	纯母乳喂养	12	否	4	14岁0月10天	14岁0月10天	14.03	14.03	2020-01-31	#REF!	注意力缺陷型	7	1	0	0	1	19	4
A14305	ZL14428	113	104	110	no	男	2010-07-17	2010-07-03	SGA（小于胎龄儿）	42	0	3300	过期产儿	1978-03-02	32	1981-03-02	29	176	75	24.21	165	65	23.88	自然怀孕	剖宫产	无	未保胎	无	未使用药物	4	2	混合喂养（母乳为主）	8	是	3	10岁3月19天	10岁3月19天	10.3	10.3	2020-01-31	#REF!	混合型	7	8	4	1	0	21	20
A14501	ZL14624	81	102	89	no	男	2011-05-03	2011-05-31	LGA（大于胎龄儿）	36	0	5200	早产儿	1962-08-07	48	1982-04-06	29	175	75	24.49	155	51	21.23	自然怀孕	剖宫产	无	未保胎	无	未使用药物	1	1	混合喂养（配方奶为主）	10	否	0.5	9岁6月4天	9岁6月4天	9.51	9.51	2020-01-31	#REF!	注意力缺陷型	6	3	0	0	0	19	12
A14502	ZL14625	76	104	87	no	男	2011-05-03	2011-05-31	AGA（适于胎龄儿）	36	0	2400	早产儿	1962-08-07	48	1982-04-06	29	175	75	24.49	155	51	21.23	自然怀孕	剖宫产	无	未保胎	无	未使用药物	1	1	混合喂养（配方奶为主）	10	否	0.5	9岁6月4天	9岁6月4天	9.51	9.51	2020-01-31	#REF!	注意力缺陷型	8	3	0	0	0	20	10
A15606	ZL15728	124	105	118	no	男	2014-08-24	2014-09-04	AGA（适于胎龄儿）	38	3	3500	足月儿	1985-01-01	29	1985-01-01	29								剖宫产	无	未保胎	无		1	1					6岁2月26天	6岁2月26天	6.24	6.24	2020-01-31	#REF!	混合型	8	9	0	0	0	25	25
A16538	ZL16660	89	119	104	no	女	2015-04-26	2015-05-09	AGA（适于胎龄儿）	38	1	3100	足月儿	1984-06-09	30	1986-03-03	29	169	70	24.51	162	47	17.91	自然怀孕	顺产	无	孕早期保胎（怀孕前3月）	无		1	1					5岁9月21天	5岁9月21天	5.81	5.81	2020-01-31	#REF!	混合型	7	8	2	0	0	19	23
A16690	ZL16812	70	77	70	no	男	2007-01-25	2007-01-25	AGA（适于胎龄儿）	40	0	3500	足月儿	1968-11-29	38	1977-12-29	29							自然怀孕	剖宫产			无		3	1					13岁10月9天	13岁10月9天	13.86	13.86	2020-01-31	#REF!	混合型	9	4	2	1	0	22	13
A17828	ZL17950	96	101	99	no	女	2011-06-15	2011-06-22	AGA（适于胎龄儿）	39	0	3430	足月儿	1984-06-04	27	1982-03-15	29	180	80	24.69	168	62	21.97	自然怀孕	剖宫产	无	未保胎	无		1	1					9岁6月3天	9岁6月3天	9.51	9.51	2020-01-31	#REF!	注意力缺陷型	5	1	1	0	0	17	8
A19698	ZL19820	100	115	107	no	男	2011-01-23	2011-01-23	AGA（适于胎龄儿）	40	0	3000	足月儿	1981-11-26	29	1981-05-13	29	181	80	24.42		50		自然怀孕	顺产	无	未保胎	无		1	1					9岁11月23天	9岁11月23天	9.98	9.98	2020-01-31	#REF!	混合型	8	7	5	1	1	21	17
A19712	ZL19834	118.15		118.15	no	男	2011-03-29	2011-03-22	AGA（适于胎龄儿）	41	0	3800	足月儿	1980-10-05	30	1981-04-08	29	175	64	20.9	172	50	16.9	自然怀孕	顺产					1	1					9岁9月17天	9岁9月17天	9.8	9.8	2020-01-31	#REF!	注意力缺陷型	5	3	5	0	0	14	9
A19796	ZL19918	102	93	98	no	男	2012-05-16	2012-06-13	AGA（适于胎龄儿）	36	0	2600	早产儿	1979-03-12	33	1983-01-19	29	168	75	26.57	169	65	22.76	自然怀孕	顺产	无	未保胎	无		1	1					8岁8月2天	8岁8月2天	8.67	8.67	2020-01-31	#REF!	混合型	9	9	2	0	0	27	24
A19898	ZL20020	88.73		88.73	no	女	2011-06-23	2011-06-30	LGA（大于胎龄儿）	39	0	7900	足月儿	1982-04-20	29	1982-05-03	29	172			159	55	21.76	自然怀孕	剖宫产	无	孕早期保胎（怀孕前3月）	无		1	1					9岁6月26天	9岁6月26天	9.57	9.57	2020-01-31	#REF!	注意力缺陷型	8	1	6	0	6	19	8
A20128	ZL20250	90.7		90.7	no	男	2010-03-17	2010-03-17	AGA（适于胎龄儿）	40	0	3500	足月儿	1976-10-05	33	1981-01-10	29	172	70	23.66	162	55	20.96	自然怀孕	顺产	无	未保胎	无		1	1					10岁10月5天	10岁10月5天	10.85	10.85	2020-01-31	#REF!	注意力缺陷型	4	3	0	0	0	12	9
A20169	ZL20291	96	112	103	no	女	2011-08-23	2011-08-23	AGA（适于胎龄儿）	40	0	3000	足月儿	1982-06-08	29	1981-09-23	29	170	65	22.49	160	60	23.44	自然怀孕	剖宫产	无	未保胎	无		1	1					9岁4月30天	9岁4月30天	9.42	9.42	2020-01-31	#REF!	注意力缺陷型	6	1	0	0	1	17	10
A20395	ZL20517	104	100	103	no	男	2013-08-30	2013-09-03	AGA（适于胎龄儿）	39	3	3520	足月儿	1982-11-16	30	1983-11-05	29	171	72	24.62	156	54	22.19	自然怀孕	顺产	无	未保胎	有		2	1					7岁4月28天	7岁4月28天	7.41	7.41	2020-01-31	#REF!	注意力缺陷型	4	3	6	2	1	15	10
A20732	ZL20854	118	100	110	no	男	2013-05-29	2013-06-05	LGA（大于胎龄儿）	39	0	6100	足月儿	1982-07-05	30	1984-05-14	29	172	90	30.42	163	54	20.32	自然怀孕	顺产											7岁8月6天	7岁8月6天	7.68	7.68	2020-01-31	#REF!	注意力缺陷型	1	1	1	0	0	10	7
A20899	ZL21021	108.63		108.63	no	男	2017-02-06	2017-03-15	LGA（大于胎龄儿）	34	5	4500	早产儿	1982-10-26	34	1987-12-15	29	172	110	37.18	158	75	30.04	人工授孕/试管婴儿	剖宫产	其他	孕早期保胎（怀孕前3月）	有		1	1					4岁0月2天	4岁0月2天	4.01	4.01	2020-01-31	#REF!	混合型	5	5	5	3	2	16	17
A21146	ZL21268	93	113	103	no	男	2014-03-19	2014-03-19	AGA（适于胎龄儿）	40	0	3350	足月儿	1987-09-21	26	1984-09-27	29	177	85	27.13	163	80	30.11	自然怀孕	顺产	无	未保胎	无		2	1					6岁10月28天	6岁10月28天	6.91	6.91	2020-01-31	#REF!	注意力缺陷型	8	3	3	0	1	17	12
A23081	ZL23203	84.42		84.42	no	女	2011-11-27	2011-12-09	AGA（适于胎龄儿）	38	2	3300	足月儿	1981-03-31	30	1982-01-05	29	169	73	25.56	163	62	23.34	自然怀孕	顺产	无	未保胎	无		1	1					9岁3月19天	9岁3月19天	9.3	9.3	2020-01-31	#REF!	注意力缺陷型	6	3	0	0	0	16	9
A23941	ZL24063	88	106	96	no	男	2013-07-03	2013-07-03	AGA（适于胎龄儿）	40	0	3200	足月儿	1983-04-10	30	1983-08-27	29																			7岁8月23天	7岁8月23天	7.73	7.73	2020-01-31	#REF!	注意力缺陷型	8	1	3	1	2	22	9
A26454	ZL26576	96	117	106	no	女	2015-06-18	2015-06-11	SGA（小于胎龄儿）	41	0	2500	足月儿	1986-06-11	29	1985-12-20	29	181	80	24.42	168	58	20.55	自然怀孕	顺产	无	未保胎	无		2	2					5岁10月10天	5岁10月10天	5.86	5.86	2020-01-31	#REF!	注意力缺陷型	2	1	5	0	0	9	5
A26896	ZL27018	105.75		105.75	no	男	2012-07-26	2012-07-26	SGA（小于胎龄儿）	40	0	2950	足月儿	1981-08-28	30	1983-01-10	29	168	66	23.38	158	55	22.03	自然怀孕	顺产	无	未保胎	无		1	1					8岁9月9天	8岁9月9天	8.77	8.77	2020-01-31	#REF!	注意力缺陷型	3	1	0	0	0	11	8
A27545	ZL27667	88.57		88.57	no	男	2013-10-15	2013-10-15	LGA（大于胎龄儿）	40	0	5000	足月儿	1982-06-05	31	1984-01-14	29							自然怀孕	剖宫产	无										7岁6月29天	7岁6月29天	7.58	7.58	2020-01-31	#REF!	注意力缺陷型	5	1	0	0	2	16	10
A27688	ZL27810	88.92		88.92	no	男	2012-07-28	2012-08-09	AGA（适于胎龄儿）	38	2	3400	足月儿	1982-09-12	29	1983-04-21	29	190	108	29.92																8岁9月18天	8岁9月18天	8.8	8.8	2020-01-31	#REF!	混合型	5	5	1	0	0	17	14
A27752	ZL27874	111	102	108	no	男	2013-11-04	2013-11-13	AGA（适于胎龄儿）	38	5	3500	足月儿	1985-10-27	28	1984-05-15	29	175	75	24.49	153	80	34.17	自然怀孕	剖宫产	无	未保胎	无			1					7岁6月13天	7岁6月13天	7.54	7.54	2020-01-31	#REF!	注意力缺陷型	0	0	0	0	0	6	3
A27918	ZL28040	84	113	97	no	女	2014-12-27	2014-12-27	AGA（适于胎龄儿）	40	0	3950	足月儿	1978-02-24	36	1985-09-10	29	172	75	25.35																6岁4月23天	6岁4月23天	6.4	6.4	2020-01-31	#REF!	注意力缺陷型	5	1	3	0	1	16	8
A159	ZL286	48	55	49	no	男	2014-06-08	2011-06-08	AGA（适于胎龄儿）	40	0	3600	足月儿	1985-01-01	30	1986-01-01	29	112	111	88.49	111	55.5	90.09	自然怀孕	剖宫产	高胆红素血症,化脓性脑膜炎及其他严重感染,其他	未保胎	无	未使用药物	1	1	纯母乳喂养	6	是	4	0岁-4月-17天	0岁-4月-17天	6.63014	6.63014	2020-01-31	#REF!	注意力缺陷型	4	1	4	1	0	12	6
A31436	ZL31557	94	100	96	no	女	2012-12-09	2012-12-09	AGA（适于胎龄儿）	40	0	3450	足月儿	1983-10-16	29	1983-02-18	29	170	70	24.22	158	50	20.03	自然怀孕	顺产	无	未保胎	无		1	1					8岁6月27天	8岁6月27天	8.57	8.57	2020-01-31	#REF!	注意力缺陷型	6	4	4	0	0	17	12
A31586	ZL31707	82	92	85	no	男	2011-09-13	2011-09-27	AGA（适于胎龄儿）	38	0	3500	足月儿	1976-11-13	34	1981-12-24	29	170	62	21.45	158	55	22.03	自然怀孕	剖宫产	无		无		1	1					9岁9月23天	9岁9月23天	9.81	9.81	2020-01-31	#REF!	注意力缺陷型	7	3	0	1	0	21	7
A32078	ZL32199	102	129	117	no	女	2012-04-12	2012-04-10	AGA（适于胎龄儿）	40	2	3750	足月儿	1982-04-08	30	1983-03-17	29	175	75	24.49	169	54	18.91	自然怀孕	顺产	无	孕早期保胎（怀孕前3月）,孕后期保胎（怀孕7月后）	无		1	1					9岁3月0天	9岁3月0天	9.25	9.25	2020-01-31	#REF!	注意力缺陷型	5	3	6	0	0	16	10
A32469	ZL32590	97.3		97.3	yes	男	2005-09-21	2005-10-07	AGA（适于胎龄儿）	37	5	3065	足月儿	1973-10-05	31	1975-12-14	29	168	75	26.57	157	52	21.1	自然怀孕	顺产	无	未保胎	无		1	1					15岁9月24天	15岁9月24天	15.82	15.82	2020-01-31	#REF!	注意力缺陷型	4	1	1	0	0	13	7
A34508	ZL34629	83.84		83.84	no	男	2014-02-21	2014-03-10	AGA（适于胎龄儿）	37	4	3300	足月儿	1980-02-08	34	1984-06-11	29	165	66	24.24	158	48	19.23	自然怀孕	剖宫产	无	未保胎	无		2	2					7岁5月12天	7岁5月12天	7.45	7.45	2020-01-31	#REF!	混合型	3	2	0	0	0	11	11
A35480	ZL35600	88.82		88.82	no	男	2016-11-23	2016-12-14	SGA（小于胎龄儿）	37	0	3100	足月儿	1984-10-02	33	1987-12-19	29	178	75	23.67	170	60	20.76	自然怀孕	顺产	其他	未保胎	无		5	3					4岁8月23天	4岁8月23天	4.73	4.73	2020-01-31	#REF!	注意力缺陷型	4	2	4	0	0	12	8
A40156	ZL40274	96.58		96.58	no	男	2016-03-21	2016-03-21	LGA（大于胎龄儿）	40	0	4400	足月儿	1987-05-01	28	1987-03-01	29	178	85	26.83	161	64	24.69	人工授孕/试管婴儿	剖宫产	无	孕中期保胎（怀孕4-6月）			1	1					6岁6月24天	6岁6月24天	6.57	6.57	2020-01-31	#REF!	混合型	9	8	6	4	0	21	20
A40822	ZL40940	88	101	93	no	男	2014-12-19	2014-12-12	AGA（适于胎龄儿）	41	0	4200	足月儿	1982-12-09	32	1985-08-13	29	174	90	29.73	170	80	27.68	自然怀孕	剖宫产	无	未保胎	无		1	1					6岁11月7天	6岁11月7天	6.94	6.94	2020-01-31	#REF!	混合型	2	2	1	0	1	10	9
A41271	ZL41389	69.48		69.48	no	男	2009-05-07	2009-06-11	AGA（适于胎龄儿）	35	0	2750	早产儿	1972-11-17	36	1980-01-27	29	172	71	24	167	59	21.16	自然怀孕	剖宫产	无	孕后期保胎（怀孕7月后）	无		2	2					12岁5月13天	12岁5月13天	12.45	12.45	2020-01-31	#REF!	混合型	3	5	3	1	1	13	15
A41948	ZL42066	72		72	no	男	2013-05-24	2013-07-02	AGA（适于胎龄儿）	34	3	2450	早产儿	1984-01-07	29	1983-12-19	29	180	71	21.91	155	48	19.98	自然怀孕	剖宫产	无	孕后期保胎（怀孕7月后）	无		1	1					8岁5月4天	8岁5月4天	8.43	8.43	2020-01-31	#REF!	多动冲动型	3	5	5	0	0	10	13
A45091	ZL45209	89	96	91	no	女	2011-11-08	2011-11-08	AGA（适于胎龄儿）	40	0	4010	足月儿	1981-06-23	30	1982-08-11	29	185	85	24.84	163	60	22.58	自然怀孕	剖宫产	无	未保胎	无		1	1					10岁1月6天	10岁1月6天	10.1	10.1	2020-01-31	#REF!	混合型	6	5	5	1	0	17	14
A46710	ZL46828	87	82	82	no	男	2012-10-04	2012-09-28	AGA（适于胎龄儿）	40	6	3220	足月儿	1981-08-16	31	1983-10-11	29	178	75	23.67	163	65	24.46	自然怀孕	剖宫产	无	未保胎	无		1	1					9岁3月4天	9岁3月4天	9.26	9.26	2020-01-31	#REF!	注意力缺陷型	7	1	1	0	0	22	3
A47209	ZL47327	73.84		73.84	no	男	2016-10-28	2016-10-28	AGA（适于胎龄儿）	40	0	3350	足月儿	1988-09-04	28	1987-01-03	29	177	80	25.54	160	51	19.92	自然怀孕	剖宫产	其他	孕后期保胎（怀孕7月后）	有		1	1					5岁2月20天	5岁2月20天	5.22	5.22	2020-01-31	#REF!	注意力缺陷型	8	3	0	0	0	22	10
A47456	ZL47574	108.81		108.81	no	男	2012-08-13	2012-08-25	SGA（小于胎龄儿）	38	2	2800	足月儿	1980-12-13	31	1983-07-09	29	185	96	28.05	165	53	19.47	自然怀孕	顺产	无	未保胎	无		1	1					9岁5月7天	9岁5月7天	9.44	9.44	2020-01-31	#REF!	混合型	3	5	4	2	1	13	16
A48093	ZL48211	124	110	121	no	男	2012-08-09	2012-08-23	AGA（适于胎龄儿）	38	0	3410	足月儿	1982-04-11	30	1983-07-02	29	175		42.45	167		49.48	自然怀孕	剖宫产	无	孕早期保胎（怀孕前3月）	无		1	1					9岁6月6天	9岁6月6天	9.52	9.52	2020-01-31	#REF!	混合型	7	5	5	0	3	21	13
A49623	ZL49741	74	105	87	no	男	2014-05-16	2014-05-16	AGA（适于胎龄儿）	40	0	3500	足月儿	1985-04-23	30	1985-09-10	29	168	70	24.8	165	50	18.37	自然怀孕	剖宫产	无	未保胎	无		1	1					7岁9月8天	7岁9月8天	7.77	7.77	2020-01-31	#REF!	混合型	9	9	2	0	0	27	24
A54564	ZL54681	93.06		93.06	no	男	2013-02-27	2013-03-20	AGA（适于胎龄儿）	37	0	2800	足月儿	1983-09-23	29	1984-02-06	29	182	84	25.36	160	50	19.53	自然怀孕	剖宫产	无	孕早期保胎（怀孕前3月）	有		2	2					9岁4月26天	9岁4月26天	9.4	9.4	2020-01-31	#REF!	注意力缺陷型	4	0	0	0	0	13	4
A5622	ZL5749	100.57		100.57	yes	男	2008-08-19	2008-08-26	SGA（小于胎龄儿）	39	0	3000	足月儿	1968-02-17	40	1979-05-05	29	170	80	27.68	160	70	27.34	自然怀孕	剖宫产	无	未保胎	无	未使用药物	3	1	纯母乳喂养	13	否	0	11岁11月5天	11岁11月5天	11.93	11.93	2020-01-31	#REF!	多动冲动型	4	5	5	0	0	12	13
A58156	ZL58273	96.54		96.54	no	男	2007-09-26	2007-09-26	SGA（小于胎龄儿）	40	0	3500	足月儿	1977-06-12	30	1978-10-01	29	183	80	23.89	160	53	20.7	自然怀孕	剖宫产	无	孕早期保胎（怀孕前3月）	无		1	1					14岁11月5天	14岁11月5天	14.93	14.93	2020-01-31	#REF!	注意力缺陷型	8	1	7	1	4	17	7
A58351	ZL58468	113	133	127	no	男	2008-01-05	2008-01-05	AGA（适于胎龄儿）	40	0	3800	足月儿	1977-11-13	30	1978-08-20	29																			14岁7月29天	14岁7月29天	14.66	14.66	2020-01-31	#REF!	混合型	5	4	0	0	1	14	13
A60354	ZL60471	98.06		98.06	no	女	2015-01-15	2015-01-08	AGA（适于胎龄儿）	41	0	3600	足月儿	1985-11-16	29	1985-03-05	29	170	69	23.88	163	55	20.7	自然怀孕	顺产	无	孕早期保胎（怀孕前3月）	无		1	1					7岁8月23天	7岁8月23天	7.73	7.73	2020-01-31	#REF!	混合型	6	8	4	0	0	17	22
A61169	ZL61286	93	100	95	no	男	2015-10-07	2015-10-07	SGA（小于胎龄儿）	40	0	2800	足月儿	1986-09-12	29	1986-07-15	29	163	58	21.83	162	57	21.72	自然怀孕	顺产					2	2					7岁0月5天	7岁0月5天	7.01	7.01	2020-01-31	#REF!	多动冲动型	3	3	5	2	0	11	13
A65042	ZL65149	109	83	96	no	男	2014-08-04	2014-08-04	LGA（大于胎龄儿）	40	0	4500	足月儿	1978-10-27	35	1985-06-25	29																			8岁4月4天	8岁4月4天	8.34	8.34	2020-01-31	#REF!	注意力缺陷型	2	0	1	0	0	9	4
A8924	ZL9051	106	101	103	no	男	2013-06-23	2013-06-27	SGA（小于胎龄儿）	39	3	4100	足月儿	1981-06-21	32	1984-05-03	29	190	100	27.7	162	66	25.15	自然怀孕	剖宫产	无	未保胎	无	未使用药物,降糖药	1	1	纯母乳喂养	10	是	0.5	7岁2月12天	7岁2月12天	7.2	7.2	2020-01-31	#REF!	混合型	7	8	0	0	0	18	19
A8942	ZL9069	103.35		103.35	no	男	2013-06-19	2013-07-14	AGA（适于胎龄儿）	36	3	2698	早产儿	1981-06-02	32	1983-12-06	29	177	85	27.13	155	51.5	21.44	自然怀孕	顺产	无	未保胎	无	未使用药物	1	1	混合喂养（母乳为主）	6	否	0.5	7岁2月17天	7岁2月17天	7.21	7.21	2020-01-31	#REF!	注意力缺陷型	3	0	0	0	0	10	4
A9481	ZL9607	87.86		87.86	no	男	2012-10-31	2012-11-03	AGA（适于胎龄儿）	39	4	3380	足月儿	1985-10-31	27	1983-03-30	29	183	85	25.38	160	55	21.48	自然怀孕	顺产	无	未保胎	无	未使用药物	2	2	混合喂养（母乳为主）	9	是	4.5	7岁11月24天	7岁11月24天	7.98	7.98	2020-01-31	#REF!	注意力缺陷型	6	2	0	0	0	17	8
A10189	ZL10312	94.66		94.66	no	男	2016-08-23	2016-10-12	LGA（大于胎龄儿）	32	6	2300	早产儿	1985-12-18	30	1986-01-04	30	170	85	29.41	152	65	28.13	人工授孕/试管婴儿	剖宫产	无	孕后期保胎（怀孕7月后）	有	未使用药物	1	1	混合喂养（配方奶为主）	3	否	2	4岁0月26天	4岁0月26天	4.07	4.07	2020-01-31	#REF!	混合型	7	8	2	0	0	19	22
A10233	ZL10356	94	101	97	no	男	2013-09-14	2013-09-14	AGA（适于胎龄儿）	40	0	3250	足月儿	1982-10-29	30	1983-03-13	30	180	100	30.86	160	53	20.7	自然怀孕	剖宫产	无	未保胎	无	未使用药物	1	1	混合喂养（母乳为主）	4	是	2	7岁0月4天	7岁0月4天	7.01	7.01	2020-01-31	#REF!	注意力缺陷型	4	4	2	0	0	14	12
A10794	ZL10917	52.35		52.35	no	男	2014-09-13	2014-09-20	LGA（大于胎龄儿）	39	0	7600	足月儿	1987-12-24	26	1983-12-04	30	171	80	27.36	151	50	21.93	自然怀孕	剖宫产	无	未保胎	无	未使用药物	1	1	纯母乳喂养	12	是	1	6岁0月12天	6岁0月12天	6.03	6.03	2020-01-31	#REF!	混合型	7	9	5	1	6	18	24
A11425	ZL11548	102.49		102.49	no	男	2010-03-18	2010-04-01	SGA（小于胎龄儿）	38	0	1875	足月儿	1982-02-05	28	1979-06-12	30	165	75	55.1	160	60	46.87	自然怀孕	剖宫产	无	孕早期保胎（怀孕前3月）	有	未使用药物	1	1	混合喂养（配方奶为主）	1	是	1	10岁6月18天	10岁6月18天	10.55	10.55	2020-01-31	#REF!	注意力缺陷型	6	1	0	0	0	15	4
A11884	ZL12007	91	117	103	no	男	2012-03-01	2012-03-15	AGA（适于胎龄儿）	38	0	2940	足月儿	1978-01-20	34	1981-10-23	30	173	70	23.39	160	50	19.53	自然怀孕	顺产	无	未保胎	无	未使用药物	1	1	纯母乳喂养	6	是	1	8岁8月27天	8岁8月27天	8.74	8.74	2020-01-31	#REF!	混合型	9	4	0	0	0	18	13
A12292	ZL12415	93	82	86	no	男	2011-03-22	2011-05-10	LGA（大于胎龄儿）	33	0	2550	早产儿	1975-10-20	35	1981-01-22	30	170	63	21.8	169	60	21.01	自然怀孕	剖宫产	无	未保胎	无	未使用药物	2	2	混合喂养（配方奶为主）	3	是	1	9岁6月23天	9岁6月23天	9.56	9.56	2020-01-31	#REF!	注意力缺陷型	5	3	4	0	1	13	12
A14424	ZL14547	115	101	109	no	男	2012-06-11	2012-06-12	AGA（适于胎龄儿）	39	6	3300	足月儿	1984-01-14	28	1981-09-16	30	173	63	21.05	165	48	17.63	自然怀孕	顺产	无	孕早期保胎（怀孕前3月）	无	未使用药物	1	1	混合喂养（配方奶为主）	1	否	2	8岁6月20天	8岁6月20天	8.55	8.55	2020-01-31	#REF!	混合型	6	6	3	1	2	17	15
A14804	ZL14927	118.31		118.31	no	男	2013-04-08	2013-04-08	AGA（适于胎龄儿）	40	0	4000	足月儿	1981-06-15	31	1983-02-15	30	180	80	24.69	171	60	20.52	自然怀孕	剖宫产	无	未保胎	无	未使用药物	1	1	混合喂养（母乳为主）	0	否	1	7岁7月3天	7岁7月3天	7.59	7.59	2020-01-31	#REF!	混合型	0	0	0	0	0	6	5
A15411	ZL15533	107	104	106	no	男	2014-07-09	2014-07-09	AGA（适于胎龄儿）	40	0	4080	足月儿	1981-10-08	32	1984-03-28	30	180	80	24.69	163	70	26.35	自然怀孕	剖宫产	无	未保胎	无		1	1					6岁4月8天	6岁4月8天	6.36	6.36	2020-01-31	#REF!	混合型	9	7	2	0	0	20	17
A15455	ZL15577	74	102	86	no	女	2013-01-31	2013-01-31	AGA（适于胎龄儿）	40	0	3150	足月儿	1981-01-03	32	1982-12-02	30	178	68	21.46	165	60	22.04	自然怀孕	顺产	无	未保胎	无		1	1					7岁11月28天	7岁11月28天	7.99	7.99	2020-01-31	#REF!	注意力缺陷型	6	2	2	0	2	15	11
A15724	ZL15846	72	89	77	no	男	2013-03-16	2013-03-16	AGA（适于胎龄儿）	40	0	3655	足月儿	1980-11-20	32	1982-10-19	30	170	78	26.99	160	56	21.87	自然怀孕	剖宫产	无	未保胎	无		1	1					7岁10月2天	7岁10月2天	7.84	7.84	2020-01-31	#REF!	注意力缺陷型	3	1	2	0	0	13	11
A16714	ZL16836	107	85	96	no	男	2011-06-27	2011-06-29	AGA（适于胎龄儿）	39	5	3750	足月儿	1976-01-02	35	1980-11-20	30	180	75	23.15	170	80	27.68	自然怀孕	剖宫产	无	未保胎	无		1	1					9岁5月6天	9岁5月6天	9.43	9.43	2020-01-31	#REF!	注意力缺陷型	8	3	0	0	4	22	12
A17936	ZL18058	88	102	94	yes	男	2009-06-18	2009-06-18	LGA（大于胎龄儿）	40	0	7300	足月儿	1979-02-19	30	1979-02-06	30	178	65	20.52	172	70	23.66	自然怀孕	顺产	无	未保胎	无		1	1					11岁6月3天	11岁6月3天	11.51	11.51	2020-01-31	#REF!	注意力缺陷型	3	1	0	0	0	11	4
A20160	ZL20282	94.83		94.83	no	男	2010-02-21	2010-02-28	AGA（适于胎龄儿）	39	0	3400	足月儿	1977-08-10	32	1979-11-04	30	174			169			自然怀孕	顺产	无	未保胎	无		2	1					10岁11月1天	10岁11月1天	10.92	10.92	2020-01-31	#REF!	注意力缺陷型	2	0	0	0	0	9	3
A20187	ZL20309	129.25		129.25	yes	男	2010-08-28	2010-09-04	AGA（适于胎龄儿）	39	0	3358	足月儿	1981-03-23	29	1980-03-02	30	178	88	27.77	157	58	23.53	自然怀孕	剖宫产	无	未保胎	无		2	1					11岁0月2天	11岁0月2天	11.01	11.01	2020-01-31	#REF!	混合型	2	3	7	2	0	11	11
A20703	ZL20825	91.15		91.15	no	男	2016-11-08	2017-11-08	AGA（适于胎龄儿）	40	0	3840	足月儿	1986-11-21	30	1987-11-01	30	173	62	20.72	167	57	20.44	自然怀孕	顺产	无	未保胎	有								4岁2月25天	4岁2月25天	4.24	4.24	2020-01-31	#REF!	混合型	8	6	0	0	0	18	14
A21170	ZL21292	132	110	126	no	男	2012-05-19	2012-06-09	AGA（适于胎龄儿）	37	0	3200	足月儿	1979-03-13	33	1981-10-03	30	170	60	20.76	158	58	23.23	自然怀孕	顺产	无	未保胎	有		1	1					8岁8月28天	8岁8月28天	8.74	8.74	2020-01-31	#REF!	多动冲动型	3	6	2	0	0	11	16
A21883	ZL22005	121	125	127	no	男	2011-12-27	2011-12-20	AGA（适于胎龄儿）	41	0	3800	足月儿	1982-09-08	29	1981-10-17	30	186	80	23.12	162	58	22.1	自然怀孕	剖宫产	无	未保胎	无		2	1					9岁2月1天	9岁2月1天	9.17	9.17	2020-01-31	#REF!	注意力缺陷型	8	4	0	0	1	20	12
A22302	ZL22424	84.59		84.59	no	男	2012-07-16	2012-07-16	SGA（小于胎龄儿）	40	0	1750	足月儿	1986-04-01	35	1991-03-02	30	183	110	3284.66	160	51	19.92	自然怀孕	顺产	无	未保胎	无		1	1					8岁7月21天	8岁7月21天	8.64	8.64	2020-01-31	#REF!	混合型	0	1	0	0	0	7	8
A22348	ZL22470	91.59		91.59	no	男	2014-06-09	2014-06-09	AGA（适于胎龄儿）	40	0	3300	足月儿	1986-03-04	28	1984-06-07	30																			6岁8月28天	6岁8月28天	6.74	6.74	2020-01-31	#REF!	多动冲动型	2	6	1	0	0	10	17
A22569	ZL22691	94	111	103	no	女	2015-04-14	2015-04-27	AGA（适于胎龄儿）	38	1	3200	足月儿	1978-10-31	36	1984-10-14	30	186	85	24.57	162	65	24.77	自然怀孕	顺产	无	未保胎	无		1	1					5岁10月26天	5岁10月26天	5.9	5.9	2020-01-31	#REF!	混合型	8	8	6	0	0	22	25
A22811	ZL22933	99.7		99.7	no	男	2013-07-28	2013-08-11	AGA（适于胎龄儿）	38	0	3430	足月儿	1979-09-04	33	1982-10-04	30	180	100	30.86	162	68	25.91	自然怀孕	顺产	无		无		2	2					7岁7月15天	7岁7月15天	7.62	7.62	2020-01-31	#REF!	混合型	9	7	4	0	1	24	20
A23755	ZL23877	74	79	74	no	男	2015-03-20	2015-04-10	SGA（小于胎龄儿）	37	0	2300	足月儿	1980-05-25	34	1984-11-16	30	172	63	21.3	162	63	24.01	自然怀孕	剖宫产	无	未保胎	无		1	1					6岁0月7天	6岁0月7天	6.02	6.02	2020-01-31	#REF!	注意力缺陷型	2	1	2	0	0	11	6
A24416	ZL24538	94	111	103	no	男	2015-12-21	2015-12-26	AGA（适于胎龄儿）	39	2	3050	足月儿	1986-12-31	28	1985-08-23	30	185	85	24.84	160	60	23.44	自然怀孕	顺产	无	孕早期保胎（怀孕前3月）	无		1	1					5岁3月11天	5岁3月11天	5.28	5.28	2020-01-31	#REF!	混合型	4	7	0	0	0	15	21
A26026	ZL26148	100	102	102	no	男	2012-11-06	2012-11-06	LGA（大于胎龄儿）	40	0	4450	足月儿	1978-01-06	34	1982-07-01	30	173	80	26.73																8岁5月16天	8岁5月16天	8.46	8.46	2020-01-31	#REF!	多动冲动型	0	2	0	0	0	7	10
A26084	ZL26206	109	114	112	no	男	2016-06-07	2016-06-09	AGA（适于胎龄儿）	39	5	3250	足月儿	1985-07-04	30	1986-02-01	30	168	75	26.57	155	48	19.98	自然怀孕	剖宫产	无	孕早期保胎（怀孕前3月）,孕中期保胎（怀孕4-6月）,孕后期保胎（怀孕7月后）	无		2	1					4岁10月15天	4岁10月15天	4.87	4.87	2020-01-31	#REF!	混合型	3	9	4	4	0	15	23
A28254	ZL28376	116	119	121	no	女	2013-08-25	2013-08-19	AGA（适于胎龄儿）	40	6	3500	足月儿	1983-02-16	30	1983-05-31	30	180	70	21.6	168	75	26.57	自然怀孕	顺产	无	未保胎	无		1	1					7岁9月0天	7岁9月0天	7.75	7.75	2020-01-31	#REF!	注意力缺陷型	4	1	0	0	0	12	6
A29502	ZL29624	87	115	100	no	男	2014-06-13	2014-06-06	SGA（小于胎龄儿）	41	0	3060	足月儿	1979-07-06	34	1983-11-16	30	167	80	28.69	150	52	23.11	自然怀孕	顺产	无	未保胎	无		1	1					6岁11月29天	6岁11月29天	7	7	2020-01-31	#REF!	混合型	5	6	4	0	0	15	15
A30684	ZL30805	79.72		79.72	no	男	2013-02-09	2013-02-23	AGA（适于胎龄儿）	38	0	3000	足月儿	1976-08-08	36	1982-06-12	30	172	84	28.39	162	65	24.77	自然怀孕	顺产	无	未保胎	无		1	1					8岁4月19天	8岁4月19天	8.39	8.39	2020-01-31	#REF!	混合型	4	5	1	0	0	14	14
A30746	ZL30867	78	106	90	no	男	2011-04-01	2011-04-01	AGA（适于胎龄儿）	40	0	3750	足月儿	1974-03-05	37	1980-06-23	30	174	78	25.76	160	45	17.58	自然怀孕	剖宫产	无	孕中期保胎（怀孕4-6月）	无		1	1					10岁2月28天	10岁2月28天	10.24	10.24	2020-01-31	#REF!	注意力缺陷型	9	3	2	0	0	27	12
A32876	ZL32997	80	83	78	no	男	2015-05-13	2015-05-13	SGA（小于胎龄儿）	40	0	2700	足月儿	1990-03-01	25	1985-01-01	30							自然怀孕	顺产	无	孕中期保胎（怀孕4-6月）	无		3						6岁2月6天	6岁2月6天	6.18	6.18	2020-01-31	#REF!	混合型	9	9	8	6	2	27	26
A37895	ZL38015	69.57		69.57	no	男	2012-12-19	2012-12-19	SGA（小于胎龄儿）	40	0	2950	足月儿	1978-11-29	34	1982-02-01	30	173	58	19.38	162	65	24.77	自然怀孕	剖宫产	无	未保胎	无		1	1					8岁8月22天	8岁8月22天	8.73	8.73	2020-01-31	#REF!	混合型	5	6	7	3	0	17	17
A37924	ZL38044	93	133	112	no	男	2012-07-11	2012-07-25	LGA（大于胎龄儿）	38	0	3760	足月儿	1980-12-16	31	1981-08-17	30	175	74	24.16	170	69	23.88													9岁2月0天	9岁2月0天	9.17	9.17	2020-01-31	#REF!	注意力缺陷型	4	1	0	0	0	13	10
A38834	ZL38954	86	95	89	no	男	2014-07-23	2014-08-08	LGA（大于胎龄儿）	37	5	3750	足月儿	1985-05-07	29	1984-05-28	30	182	80	24.15	164	65	24.17	自然怀孕	顺产	无	未保胎	无		1	1					7岁2月1天	7岁2月1天	7.17	7.17	2020-01-31	#REF!	注意力缺陷型	5	1	0	0	0	14	10
A39966	ZL40084	80	85	79	yes	男	2010-01-11	2010-01-11	AGA（适于胎龄儿）	40	0	4000	足月儿	1979-07-04	31	1980-09-06	30	165	60	22.04	158	58	23.23	自然怀孕	顺产	无		无		2	2					11岁8月27天	11岁8月27天	11.74	11.74	2020-01-31	#REF!	注意力缺陷型	8	1	1	1	1	18	8
A42281	ZL42399	93	107	100	no	男	2017-08-03	2017-08-03	SGA（小于胎龄儿）	40	0	3800	足月儿	1986-04-14	31	1987-01-02	30	170	60	20.76	162	48	18.29	自然怀孕	剖宫产	无	未保胎	无		2	1					4岁2月30天	4岁2月30天	4.25	4.25	2020-01-31	#REF!	混合型	6	4	1	0	0	13	13
A43630	ZL43748	77	104	88	yes	男	2010-08-27	2010-08-27	AGA（适于胎龄儿）	40	0	3150	足月儿	1975-12-29	34	1979-09-28	30	164	65	24.17	163	63	23.71	自然怀孕	顺产	其他	未保胎	无		1	1					11岁2月24天	11岁2月24天	11.23	11.23	2020-01-31	#REF!	注意力缺陷型	9	2	2	0	0	25	7
A44302	ZL44420	113	87	102	no	男	2015-04-18	2015-04-23	LGA（大于胎龄儿）	39	2	4000	足月儿	1982-10-15	32	1984-07-07	30																			6岁8月10天	6岁8月10天	6.69	6.69	2020-01-31	#REF!	混合型	9	4	0	0	0	23	14
A44311	ZL44429	70.05		70.05	no	男	2017-07-15	2017-08-06	LGA（大于胎龄儿）	36	6	3650	早产儿	1987-07-26	29	1987-07-20	30																			5岁1月23天	5岁1月23天	5.15	5.15	2020-01-31	#REF!	注意力缺陷型	3	2	1	0	0	14	9
A44435	ZL44553	102	105	103	no	男	2014-08-27	2014-08-30	AGA（适于胎龄儿）	39	4	3500	足月儿	1979-09-19	34	1984-02-14	30	180	84	51.85	158	53	21.23	自然怀孕	剖宫产	无	未保胎	无		1	1					7岁3月7天	7岁3月7天	7.27	7.27	2020-01-31	#REF!	混合型	7	8	5	1	0	17	18
A54295	ZL54412	83.73		83.73	no	男	2012-10-04	2012-10-04	AGA（适于胎龄儿）	40	0	3400	足月儿	1977-04-03	35	1981-10-14	30	175.6	95	30.81	157	53	21.5	自然怀孕	顺产	无	未保胎	无		1	1					9岁9月17天	9岁9月17天	9.8	9.8	2020-01-31	#REF!	注意力缺陷型	5	0	0	0	1	15	0
A57624	ZL57741	100	95	97	no	男	2014-04-03	2014-04-06	LGA（大于胎龄儿）	39	4	6300	足月儿	1983-07-05	30	1983-10-09	30	173	60	20.05	163	56	21.08	自然怀孕	剖宫产	无	未保胎	无		1	1					8岁4月24天	8岁4月24天	8.4	8.4	2020-01-31	#REF!	注意力缺陷型	8	4	8	2	0	19	11
A61785	ZL61899	75.84		75.84	no	男	2014-11-05	2014-11-12	AGA（适于胎龄儿）	39	0	2890	足月儿	1986-09-21	28	1984-03-12	30	170	68	23.53	165	66	24.24	自然怀孕	剖宫产	无	未保胎	无		1	1					7岁11月16天	7岁11月16天	7.96	7.96	2020-01-31	#REF!	混合型	6	5	4	1	1	18	17
A6655	ZL6782	85.89		85.89	no	女	2010-06-29	2010-07-20	AGA（适于胎龄儿）	37	0	3400	足月儿	1976-11-11	33	1979-10-17	30	174	84	27.74	164	65	48.33	自然怀孕	顺产	无	未保胎	无	未使用药物	1	1	纯母乳喂养	9	是	1	10岁6月23天	10岁6月23天	10.56	10.56	2020-01-31	#REF!	注意力缺陷型	4	0	0	0	0	13	4
A8367	ZL8494	109.65		109.65	no	女	2012-06-04	2012-06-18	LGA（大于胎龄儿）	38	0	3000	足月儿	1981-03-06	31	1981-06-26	30	178	75	23.67	164	57	21.19	自然怀孕	剖宫产	无	未保胎	无	未使用药物	2	2	混合喂养（母乳为主）	5	是	1.5	8岁5月1天	8岁5月1天	8.42	8.42	2020-01-31	#REF!	混合型	7	5	0	0	0	17	14
A9324	ZL9451	73	95	81	no	男	2014-12-30	2014-12-30	AGA（适于胎龄儿）	40	0	3000	足月儿	1989-11-23	25	1984-12-30	30	178	60	18.94	164	60	22.31	自然怀孕	顺产	无	未保胎	无	未使用药物	1	1	混合喂养（母乳为主）	0	是	1	5岁8月13天	5岁8月13天	5.7	5.7	2020-01-31	#REF!	混合型	5	6	4	0	0	18	19
A9379	ZL9506	93.52		93.52	no	男	2014-05-07	2014-05-23	AGA（适于胎龄儿）	37	5	3500	足月儿	1984-01-13	30	1983-12-07	30	178	80	25.25	163	74	27.85	自然怀孕	剖宫产	无	未保胎	有	未使用药物	1	1	人工喂养	0	否	1	7岁2月21天	7岁2月21天	7.22	7.22	2020-01-31	#REF!	混合型	8	6	3	0	0	18	16
A9514	ZL9637	98.51		98.51	no	女	2016-08-23	2016-10-12	AGA（适于胎龄儿）	32	6	1850	早产儿	1985-12-18	30	1986-01-04	30	170	90	31.14	152	65	28.13	人工授孕/试管婴儿	剖宫产	缺氧窒息	孕早期保胎（怀孕前3月）,孕后期保胎（怀孕7月后）	有	未使用药物	1	1	混合喂养（配方奶为主）	3	否	2	4岁3月19天	4岁3月19天	4.3	4.3	2020-01-31	#REF!	混合型	7	6	4	0	0	23	19
A10110	ZL10233	64	78	68	no	男	2013-01-06	2013-01-15	AGA（适于胎龄儿）	38	5	3430	足月儿	1978-11-01	34	1981-02-28	31	168	65	23.03	164	58	21.56	自然怀孕	顺产	无	孕中期保胎（怀孕4-6月）	无	未使用药物	1	1	混合喂养（母乳为主）	4	否	1	7岁9月20天	7岁9月20天	7.8	7.8	2020-01-31	#REF!	注意力缺陷型	5	3	0	0	0	15	10
A10236	ZL10359	84.79		84.79	no	男	2012-06-15	2012-07-09	AGA（适于胎龄儿）	36	4	2640	早产儿	1979-12-22	32	1981-05-09	31	174	75	24.77	168	60	21.26	自然怀孕	顺产	无	未保胎	无	未使用药物	1	1	混合喂养（母乳为主）	12	否	8	8岁3月3天	8岁3月3天	8.26	8.26	2020-01-31	#REF!	注意力缺陷型	3	1	0	0	0	12	9
A10347	ZL10470	88.33		88.33	no	男	2006-09-29	2006-09-29	AGA（适于胎龄儿）	40	0	3200	足月儿	1976-09-25	30	1975-03-17	31	176	70	22.6	155	53	22.06	自然怀孕	剖宫产	无	未保胎	无	未使用药物	1	1	混合喂养（母乳为主）	12	否	1	14岁3月16天	14岁3月16天	14.29	14.29	2020-01-31	#REF!	注意力缺陷型	3	0	0	0	0	12	1
A10883	ZL11006	72	85	75	no	男	2014-07-03	2014-06-30	AGA（适于胎龄儿）	40	3	3300	足月儿	1980-07-19	33	1983-04-30	31	170	85	29.41	160	51	19.92	自然怀孕	剖宫产	无	未保胎	无	未使用药物	1	1	纯母乳喂养	6	是	0.5	6岁4月4天	6岁4月4天	6.34	6.34	2020-01-31	#REF!	混合型	2	4	1	0	0	11	11
A12155	ZL12278	93	115	103	no	女	2012-04-24	2012-04-24	AGA（适于胎龄儿）	40	0	3300	足月儿	1980-10-09	31	1981-03-07	31	175	100	32.65	166	52	18.87	自然怀孕	顺产	无	未保胎	无	未使用药物	2	2	纯母乳喂养	12	否	0.5	8岁7月9天	8岁7月9天	8.61	8.61	2020-01-31	#REF!	注意力缺陷型	8	3	1	1	0	21	10
A12515	ZL12638	98	115	106	no	女	2012-08-10	2012-08-23	AGA（适于胎龄儿）	38	1	3250	足月儿	1978-02-28	34	1980-10-09	31	172	90	30.42	168	68	24.09	自然怀孕	剖宫产	无	孕早期保胎（怀孕前3月）	无	未使用药物	1	1	纯母乳喂养	7	是	1.5	9岁1月15天	9岁1月15天	9.12	9.12	2020-01-31	#REF!	注意力缺陷型	3	2	1	0	0	11	6
A12538	ZL12661	94	100	96	no	女	2013-07-25	2013-07-23	AGA（适于胎龄儿）	40	2	3800	足月儿	1979-06-03	34	1981-09-18	31	172	70	47.32	162	60	22.86	自然怀孕	剖宫产	无	未保胎	无	未使用药物	1	1	人工喂养	1	否	1	7岁2月22天	7岁2月22天	7.23	7.23	2020-01-31	#REF!	注意力缺陷型	7	3	0	0	0	18	11
A12772	ZL12895	107	89	99	no	女	2014-06-03	2014-06-03	SGA（小于胎龄儿）	40	0	2800	足月儿	1981-07-30	32	1983-04-22	31	170	85	29.41	158	60	24.03	自然怀孕	顺产	无	未保胎	无	未使用药物	1	1	混合喂养（配方奶为主）	1	否	1	6岁4月17天	6岁4月17天	6.38	6.38	2020-01-31	#REF!	注意力缺陷型	7	3	2	0	0	20	10
A13155	ZL13278	111.11		111.11	no	男	2015-11-20	2015-11-23	AGA（适于胎龄儿）	39	4	3000	足月儿	1975-07-12	40	1984-01-12	31	183	84	25.08	163	54	20.32	自然怀孕	顺产	其他	孕早期保胎（怀孕前3月）,孕后期保胎（怀孕7月后）	无	其他	2	2	混合喂养（配方奶为主）	0	否	1.5	4岁11月3天	4岁11月3天	4.92	4.92	2020-01-31	#REF!	混合型	7	8	2	0	0	18	20
A13252	ZL13375	74.44		74.44	no	男	2010-02-22	2010-03-08	AGA（适于胎龄儿）	38	0	2900	足月儿	1973-05-07	36	1978-12-09	31	163	65	24.46	156	65	26.71	自然怀孕	顺产	无	未保胎	无	未使用药物	1	1	混合喂养（配方奶为主）	1	否	2	10岁8月2天	10岁8月2天	10.67	10.67	2020-01-31	#REF!	混合型	5	7	2	0	0	17	20
A13531	ZL13654	87	113	99	no	男	2013-10-06	2013-12-01	AGA（适于胎龄儿）	32	0	2000	早产儿	1981-01-20	32	1981-12-02	31	170	72	24.91	155	48	19.98	自然怀孕	顺产	化脓性脑膜炎及其他严重感染	孕早期保胎（怀孕前3月）	无	未使用药物	1	1	纯母乳喂养	12	否	1	7岁1月13天	7岁1月13天	7.12	7.12	2020-01-31	#REF!	混合型	8	5	7	3	1	24	14
A13719	ZL13842	105.27		105.27	no	男	2013-04-11	2013-02-07	SGA（小于胎龄儿）	49	0	3850	过期产儿	1977-10-10	35	1981-09-19	31	176	90	29.05	160	60	23.44	自然怀孕	剖宫产	无	未保胎	无	未使用药物	2	1	混合喂养（母乳为主）	3	是	0.5	7岁6月18天	7岁6月18天	7.55	7.55	2020-01-31	#REF!	混合型	5	5	0	0	3	14	14
A13820	ZL13943	113	125	122	no	男	2013-03-14	2013-04-02	AGA（适于胎龄儿）	37	2	2700	足月儿	1980-04-05	32	1981-10-27	31	170	61	21.11	165	55	20.2	自然怀孕	顺产	无	未保胎	有	降压药	4	2	人工喂养	3	是	1	7岁7月16天	7岁7月16天	7.63	7.63	2020-01-31	#REF!	注意力缺陷型	4	3	1	0	0	12	9
A14226	ZL14349	102	113	108	no	男	2013-06-13	2013-07-04	LGA（大于胎龄儿）	37	0	3800	足月儿	1977-03-03	36	1982-04-14	31	173	60	20.05	163	50	18.82	自然怀孕	剖宫产	无	孕早期保胎（怀孕前3月）	有	未使用药物	2	2	纯母乳喂养	6	否	5	7岁4月21天	7岁4月21天	7.39	7.39	2020-01-31	#REF!	混合型	2	3	1	2	0	10	11
A14753	ZL14876	103	101	103	no	女	2010-09-10	2010-09-17	AGA（适于胎龄儿）	39	0	3200	足月儿	1978-11-28	31	1978-09-20	31	167	77	27.61	155	59	24.56	自然怀孕	顺产	无	孕早期保胎（怀孕前3月）	无	未使用药物	2	1	混合喂养（配方奶为主）	3	是	0.5	10岁2月0天	10岁2月0天	10.17	10.17	2020-01-31	#REF!	注意力缺陷型	6	2	1	0	1	19	7
A15056	ZL15178	117.88		117.88	no	男	2012-01-23	2012-01-23	AGA（适于胎龄儿）	40	0	3050	足月儿	1970-01-08	42	1980-10-09	31	160	70	27.34	155	48	19.98	自然怀孕	剖宫产	无	未保胎	无	未使用药物	2	1	纯母乳喂养	10	否	4	8岁9月21天	8岁9月21天	8.81	8.81	2020-01-31	#REF!	混合型	9	9	4	0	6	27	27
A15506	ZL15628	91	106	98	no	男	2012-08-19	2012-09-09	AGA（适于胎龄儿）	37	0	3300	足月儿	1978-04-21	34	1980-11-22	31	169	70	24.51	155	52	21.64	自然怀孕	剖宫产	无	未保胎	无		3	2					8岁2月30天	8岁2月30天	8.25	8.25	2020-01-31	#REF!	注意力缺陷型	3	1	1	0	0	15	11
A15543	ZL15665	81.56		81.56	no	男	2008-09-18	2008-10-02	SGA（小于胎龄儿）	38	0	2510	足月儿	1974-09-20	34	1977-06-10	31	172	80	27.04	160	63	24.61	人工授孕/试管婴儿	剖宫产	无	孕早期保胎（怀孕前3月）	无		2	1					12岁2月0天	12岁2月0天	12.17	12.17	2020-01-31	#REF!	注意力缺陷型	3	2	3	0	1	12	6
A15953	ZL16075	104	119	113	no	男	2013-06-15	2013-06-29	LGA（大于胎龄儿）	38	0	3880	足月儿	1981-10-17	31	1981-11-21	31	181	90	27.47	158	51	20.43	自然怀孕	顺产	其他	未保胎,孕早期保胎（怀孕前3月）	无		2	1					7岁5月8天	7岁5月8天	7.44	7.44	2020-01-31	#REF!	混合型	7	7	3	1	0	21	20
A17212	ZL17334	82	98	88	no	男	2012-03-25	2012-03-25	SGA（小于胎龄儿）	40	0	2800	足月儿	1984-11-04	27	1980-05-06	31																			8岁8月16天	8岁8月16天	8.71	8.71	2020-01-31	#REF!	注意力缺陷型	5	1	0	0	0	15	6
A17632	ZL17754	75.28		75.28	no	女	2011-02-19	2011-03-19	AGA（适于胎龄儿）	36	0	2580	早产儿	1975-09-17	35	1979-09-11	31	179	85	26.53	161	52	20.06	自然怀孕	顺产	无	未保胎	无		2	1					9岁9月25天	9岁9月25天	9.82	9.82	2020-01-31	#REF!	注意力缺陷型	2	0	0	0	1	11	4
A17681	ZL17803	120	111	117	no	女	2015-04-16	2015-04-16	AGA（适于胎龄儿）	40	0	3700	足月儿	1983-03-07	32	1983-08-13	31																			5岁11月29天	5岁11月29天	6	6	2020-01-31	#REF!	注意力缺陷型	6	2	2	0	0	16	10
A18343	ZL18465	95	90	92	no	女	2013-07-03	2013-07-03	SGA（小于胎龄儿）	40	0	3000	足月儿	1980-03-09	33	1982-05-05	31	173	80	53.46	163	58	43.66	自然怀孕	剖宫产	无	未保胎	无		1	1					7岁5月22天	7岁5月22天	7.48	7.48	2020-01-31	#REF!	注意力缺陷型	9	1	0	0	0	23	6
A19537	ZL19659	96	98	97	no	男	2012-01-20	2012-01-20	AGA（适于胎龄儿）	40	0	3000	足月儿	1981-10-01	30	1980-12-31	31	172	75	25.35	152	50	21.64	自然怀孕	剖宫产	无	未保胎	有		1	1					8岁11月25天	8岁11月25天	8.99	8.99	2020-01-31	#REF!	注意力缺陷型	7	3	0	0	3	17	9
A19903	ZL20025	119	125	126	no	男	2011-12-08	2011-12-06	AGA（适于胎龄儿）	40	2	4065	足月儿	1972-11-10	39	1980-11-26	31	180		20.06	170			自然怀孕	剖宫产	无	未保胎	无		1	1					9岁7月1天	9岁7月1天	9.59	9.59	2020-01-31	#REF!	混合型	2	1	3	0	0	9	7
A20019	ZL20141	107		107	no	男	2008-06-12	2008-06-12	AGA（适于胎龄儿）	40	0	3800	足月儿	1974-12-31	33	1977-01-16	31	183	75	22.4	162	50	19.05	自然怀孕	剖宫产	无		无		2	1					12岁8月19天	12岁8月19天	12.72	12.72	2020-01-31	#REF!	注意力缺陷型	1	0	0	0	0	8	4
A20410	ZL20532	101.63		101.63	no	男	2010-04-20	2010-04-20	AGA（适于胎龄儿）	40	0	3700	足月儿	1974-12-31	35	1978-11-18	31	175	82.5	53.88	162	55	41.91	自然怀孕	顺产	无	未保胎	无		3	2					10岁9月8天	10岁9月8天	10.77	10.77	2020-01-31	#REF!	混合型	3	2	3	0	0	9	10
A21576	ZL21698	96	98	97	no	男	2013-02-18	2013-03-11	AGA（适于胎龄儿）	37	0	2980	足月儿	1978-10-08	34	1981-11-17	31	171	60	20.52	155	50	20.81	自然怀孕	剖宫产	无	孕早期保胎（怀孕前3月）	无		1	1					8岁0月5天	8岁0月5天	8.01	8.01	2020-01-31	#REF!	注意力缺陷型	4	1	2	0	0	11	7
A26245	ZL26367	107	117	114	no	男	2013-12-03	2013-12-03	SGA（小于胎龄儿）	40	0	2500	足月儿	1983-05-18	30	1982-11-30	31																			7岁4月21天	7岁4月21天	7.39	7.39	2020-01-31	#REF!	混合型	3	2	1	0	0	12	10
A30853	ZL30974	98	112	104	no	男	2010-08-05	2010-08-05	LGA（大于胎龄儿）	40	0	4000	足月儿	1969-03-29	41	1978-11-06	31	175	70	22.86	163	55	20.7	自然怀孕	剖宫产	无	未保胎	无		2	2					10岁10月25天	10岁10月25天	10.9	10.9	2020-01-31	#REF!	注意力缺陷型	0	0	0	0	0	6	3
A33632	ZL33753	95	95	94	no	女	2014-05-28	2014-06-23	AGA（适于胎龄儿）	36	2	2510	早产儿	1984-10-09	29	1982-12-17	31	181	230	35.1	163	70	26.35	自然怀孕	剖宫产	无	孕早期保胎（怀孕前3月）	无		1	1					7岁1月30天	7岁1月30天	7.17	7.17	2020-01-31	#REF!	注意力缺陷型	5	2	0	0	0	15	9
A40078	ZL40196	88	98	91	no	男	2014-08-27	2014-08-26	AGA（适于胎龄儿）	40	1	3600	足月儿	1974-05-18	40	1983-06-05	31	175	70	22.86	163	65	24.46	自然怀孕	顺产	无	未保胎	无		1	1					7岁1月11天	7岁1月11天	7.11	7.11	2020-01-31	#REF!	混合型	2	0	0	0	0	10	8
A41282	ZL41400	102	125	114	no	男	2015-04-02	2015-03-29	LGA（大于胎龄儿）	40	4	7950	足月儿	1983-11-30	31	1984-03-24	31	173	65	21.72	167	48	17.21	人工授孕/试管婴儿	剖宫产	无	未保胎	无		2	1					6岁6月18天	6岁6月18天	6.55	6.55	2020-01-31	#REF!	混合型	3	6	4	0	1	12	12
A42843	ZL42961	98	75	86	no	男	2015-07-05	2015-06-28	SGA（小于胎龄儿）	41	0	2900	足月儿	1987-02-03	28	1984-01-28	31	176	75	24.21	165	65	23.88	自然怀孕	顺产	无	孕早期保胎（怀孕前3月）	无		1	1					6岁4月5天	6岁4月5天	6.35	6.35	2020-01-31	#REF!	混合型	7	9	6	3	0	19	24
A47882	ZL48000	89	85	86	no	男	2014-03-01	2014-02-26	LGA（大于胎龄儿）	40	3	6400	足月儿	1979-11-26	34	1982-05-21	31	175	62	20.24	158	46	18.43	自然怀孕	顺产	无	未保胎	无		1	1					7岁10月24天	7岁10月24天	7.9	7.9	2020-01-31	#REF!	注意力缺陷型	4	1	2	1	1	12	8
A48106	ZL48224	109	98	103	no	男	2015-01-14	2015-01-25	AGA（适于胎龄儿）	38	3	3010	足月儿	1983-08-01	31	1983-02-12	31	183																		7岁0月14天	7岁0月14天	7.04	7.04	2020-01-31	#REF!	注意力缺陷型	4	1	3	0	0	12	4
A54141	ZL54258	124	93	110	no	男	2015-01-21	2015-01-21	AGA（适于胎龄儿）	40	0	3500	足月儿	1978-12-29	36	1983-12-02	31							自然怀孕	剖宫产	无	未保胎	无		2	1					7岁5月29天	7岁5月29天	7.5	7.5	2020-01-31	#REF!	混合型	9	9	8	2	0	20	18
A57333	ZL57450	72.95		72.95	no	女	2009-07-07	2009-07-07	AGA（适于胎龄儿）	40	0	3500	足月儿	1976-09-13	32	1978-05-18	31	169	67	23.46	172	54	18.25	自然怀孕	剖宫产	无	未保胎	无		1	1					13岁1月17天	13岁1月17天	13.13	13.13	2020-01-31	#REF!	注意力缺陷型	6	0	1	0	0	16	6
A61674	ZL61791	93	106	100	no	男	2014-12-18	2015-01-01	SGA（小于胎龄儿）	38	0	2400	足月儿	1981-02-05	33	1983-08-22	31	165	65	23.88	155	55	22.89	人工授孕/试管婴儿	剖宫产	无	未保胎	无		1	1					7岁10月6天	7岁10月6天	7.85	7.85	2020-01-31	#REF!	混合型	2	3	3	0	0	11	11
A7162	ZL7289	92.83		92.83	no	女	2013-08-08	2013-08-05	LGA（大于胎龄儿）	40	3	4550	足月儿	1979-12-29	33	1981-10-21	31	180	80	24.69	170	70	24.22	自然怀孕	剖宫产	无	未保胎	无	未使用药物	1	1	混合喂养（母乳为主）	7	是	2	7岁2月0天	7岁2月0天	7.17	7.17	2020-01-31	#REF!	混合型	5	6	1	0	0	16	15
A8395	ZL8522	125.54		125.54	yes	男	2010-07-12	2010-07-20	AGA（适于胎龄儿）	38	6	3100	足月儿	1974-03-24	36	1978-07-26	31	178	80	25.25	160	55	21.48	自然怀孕	剖宫产	无	未保胎	无	未使用药物	1	1	混合喂养（配方奶为主）	3	是	2	11岁4月23天	11岁4月23天	11.4	11.4	2020-01-31	#REF!	注意力缺陷型	6	0	0	0	0	14	1
A8480	ZL8607	91.24		91.24	no	男	2012-06-06	2012-06-14	AGA（适于胎龄儿）	38	6	3580	足月儿	1979-09-25	32	1980-07-05	31	174	90	297265.16	163	61	229590.88	自然怀孕	顺产	无	未保胎	无	未使用药物	1	1	混合喂养（母乳为主）	9	是	3.5	8岁4月3天	8岁4月3天	8.34	8.34	2020-01-31	#REF!	注意力缺陷型	5	3	4	0	3	16	9
A9374	ZL9501	56	69	60	no	男	2015-09-07	2015-10-26	AGA（适于胎龄儿）	33	0	1600	早产儿	1982-02-04	33	1984-08-17	31	178	65	20.52	160	65	25.39	自然怀孕	剖宫产	无	未保胎,孕早期保胎（怀孕前3月）	无	未使用药物	2	1	纯母乳喂养	6	是	1	5岁1月14天	5岁1月14天	5.12	5.12	2020-01-31	#REF!	混合型	9	6	5	0	0	25	19
A9648	ZL9771	88	96	90	no	男	2013-11-09	2013-11-16	AGA（适于胎龄儿）	39	0	3210	足月儿	1981-10-22	32	1982-01-28	31	168	68	24.09	161	48	18.52	自然怀孕	顺产	无	未保胎	无	未使用药物	2	1	混合喂养（配方奶为主）	1	是	0.5	6岁10月3天	6岁10月3天	6.84	6.84	2020-01-31	#REF!	注意力缺陷型	8	3	1	0	0	19	9
A10538	ZL10661	96	92	94	no	男	2012-11-29	2012-11-29	AGA（适于胎龄儿）	40	0	3500	足月儿	1977-03-01	35	1980-09-02	32	173	95	31.74	155	45	18.73	自然怀孕	顺产	缺氧窒息	未保胎	无	未使用药物	2	1	混合喂养（配方奶为主）	4	否	0.5	7岁9月23天	7岁9月23天	7.81	7.81	2020-01-31	#REF!	注意力缺陷型	7	3	0	0	0	16	8
A10870	ZL10993	100	101	101	no	男	2013-06-18	2013-06-25	LGA（大于胎龄儿）	39	0	4320	足月儿	1982-05-26	31	1980-07-04	32	180	90	55.56	160	80	62.5	自然怀孕	剖宫产	无	孕早期保胎（怀孕前3月）	无	未使用药物	3	1	人工喂养	1	否	0.5	7岁3月7天	7岁3月7天	7.27	7.27	2020-01-31	#REF!	混合型	9	5	1	0	0	26	14
A11373	ZL11496	88	102	94	no	男	2013-01-17	2013-01-31	AGA（适于胎龄儿）	38	0	3730	足月儿	1980-11-21	32	1980-11-18	32	175	65	212244.9	163	85	319921.71	自然怀孕	剖宫产	无	未保胎	有	降压药	1	1	混合喂养（配方奶为主）	0	否	2	7岁8月19天	7岁8月19天	7.72	7.72	2020-01-31	#REF!	注意力缺陷型	5	1	0	0	0	17	6
A11696	ZL11819	97.48		97.48	no	男	2012-11-08	2012-11-29	LGA（大于胎龄儿）	37	0	3750	足月儿	1967-03-09	45	1980-08-03	32	178	75	23.67	168	60	21.26	自然怀孕	顺产	无	未保胎	无	未使用药物	1	1	混合喂养（母乳为主）	9	否	0.5	7岁10月29天	7岁10月29天	7.91	7.91	2020-01-31	#REF!	注意力缺陷型	3	1	2	1	0	11	8
A12790	ZL12913	87	77	79	yes	男	2009-07-31	2009-08-28	SGA（小于胎龄儿）	36	0	1500	早产儿	1977-09-03	31	1977-08-02	32	176	70	22.6	162	50	19.05	自然怀孕	剖宫产	其他	孕早期保胎（怀孕前3月）	有	未使用药物	1	1	混合喂养（配方奶为主）	6	否	0.5	11岁2月20天	11岁2月20天	11.22	11.22	2020-01-31	#REF!	混合型	7	4	3	0	0	19	14
A13414	ZL13537	86	90	86	no	男	2013-10-23	2013-10-22	SGA（小于胎龄儿）	40	1	315	足月儿	1975-04-24	38	1981-07-16	32	169	75	26.26	162	63	24.01	自然怀孕	顺产	无	未保胎	无	未使用药物	3	4	纯母乳喂养	12	否	1	7岁0月14天	7岁0月14天	7.04	7.04	2020-01-31	#REF!	混合型	3	3	2	0	0	12	11
A13885	ZL14008	110	113	112	no	男	2011-06-23	2011-06-30	SGA（小于胎龄儿）	39	0	1900	足月儿	1978-03-06	33	1978-09-27	32	171	70	23.94	158	60	24.03	自然怀孕	剖宫产	无	未保胎,孕早期保胎（怀孕前3月）	无	未使用药物	2	2	纯母乳喂养	10	否	1	9岁4月8天	9岁4月8天	9.36	9.36	2020-01-31	#REF!	注意力缺陷型	4	3	0	0	0	13	12
A14634	ZL14757	93.81		93.81	no	男	2016-12-26	2016-12-23	AGA（适于胎龄儿）	40	3	3500	足月儿	1979-10-12	37	1984-10-30	32	180	80	24.69	170	85	29.41	自然怀孕	剖宫产	无	未保胎	有	未使用药物	1	1	人工喂养	0	否	1	4岁	4岁	4.02	4.02	2020-01-31	#REF!	多动冲动型	2	5	1	1	0	11	14
A14742	ZL14865	71	76	71	no	女	2016-01-11	2016-01-11	AGA（适于胎龄儿）	40	0	3450	足月儿	1982-07-23	33	1983-02-21	32	186	90	26.01	164	55	20.45	自然怀孕	剖宫产	无	未保胎	无	未使用药物	1	1	混合喂养（母乳为主）	1	是	1	5岁0月2天	5岁0月2天	5.01	5.01	2020-01-31	#REF!	注意力缺陷型	3	0	3	0	0	11	6
A14865	ZL14988	88	83	84	no	男	2012-07-01	2012-06-10	SGA（小于胎龄儿）	43	0	3625	过期产儿	1982-04-03	30	1980-04-16	32	179	90	56.18	155	49	40.37	自然怀孕	顺产	无	未保胎	无	未使用药物	1	1	混合喂养（配方奶为主）	1	是	0.5	8岁4月10天	8岁4月10天	8.36	8.36	2020-01-31	#REF!	混合型	4	8	5	0	0	14	22
A15702	ZL15824	103	102	103	no	男	2013-08-20	2013-08-20	AGA（适于胎龄儿）	40	0	3550	足月儿	1981-09-24	31	1981-06-13	32							自然怀孕	剖宫产	无	未保胎	无		1	1					7岁3月0天	7岁3月0天	7.25	7.25	2020-01-31	#REF!	混合型	8	8	2	0	0	22	20
A16629	ZL16751	92	102	96	no	男	2013-09-27	2013-09-27	AGA（适于胎龄儿）	40	0	3750	足月儿	1981-09-25	32	1981-10-03	32	175	73	23.84	168	48	17.01	自然怀孕	顺产	无	孕早期保胎（怀孕前3月）	无		1	1					7岁2月6天	7岁2月6天	7.18	7.18	2020-01-31	#REF!	多动冲动型	2	5	2	0	0	9	15
A17489	ZL17611	94	104	99	no	男	2013-07-08	2013-07-08	SGA（小于胎龄儿）	40	0	2500	足月儿	1984-03-15	29	1981-07-16	32	175	70	45.71	158	62.5	42.06		剖宫产			无		1	1					7岁5月6天	7岁5月6天	7.43	7.43	2020-01-31	#REF!	混合型	7	8	8	2	0	22	25
A17723	ZL17845	73	83	75	yes	女	2009-02-04	2009-02-04	AGA（适于胎龄儿）	40	0	3000	足月儿	1977-02-06	32	1977-01-06	32	170	75	25.95	165	60	22.04	自然怀孕	顺产	无	未保胎	无		1	1					11岁10月13天	11岁10月13天	11.87	11.87	2020-01-31	#REF!	注意力缺陷型	7	3	0	0	1	19	11
A18262	ZL18384	91.92		91.92	no	男	2010-01-04	2009-12-28	AGA（适于胎龄儿）	41	0	3400	足月儿	1974-09-09	35	1977-05-09	32	170			162	70	26.67	自然怀孕	剖宫产	无	未保胎	无		2	1					10岁11月20天	10岁11月20天	10.97	10.97	2020-01-31	#REF!	混合型	1	1	3	2	0	5	6
A19618	ZL19740	113.53		113.53	no	男	2013-10-09	2013-10-14	AGA（适于胎龄儿）	39	2	3045	足月儿	1983-10-24	29	1981-02-19	32							自然怀孕	剖宫产	无	未保胎	无		1	1					7岁3月6天	7岁3月6天	7.27	7.27	2020-01-31	#REF!	混合型	5	6	2	0	0	13	13
A19694	ZL19816	111	133	124	no	男	2015-12-23	2015-12-23	AGA（适于胎龄儿）	40	0	3900	足月儿	1983-08-30	32	1983-07-23	32										未保胎	无		1	1					5岁0月23天	5岁0月23天	5.06	5.06	2020-01-31	#REF!	混合型	3	2	2	0	0	11	10
A20244	ZL20366	98	85	90	no	男	2014-08-18	2014-08-18	AGA（适于胎龄儿）	40	0	3500	足月儿	1981-09-29	32	1982-01-03	32	171	65	22.23	170	70	24.22	自然怀孕	剖宫产	无	未保胎	无		1	1					6岁5月7天	6岁5月7天	6.44	6.44	2020-01-31	#REF!	混合型	8	6	7	1	0	22	21
A21138	ZL21260	76.93		76.93	no	女	2011-05-09	2011-06-30	LGA（大于胎龄儿）	32	4	2300	早产儿	1974-06-14	36	1978-08-10	32	170	70	24.22	160	65	25.39	自然怀孕	剖宫产	无	未保胎	无		2	1					9岁9月7天	9岁9月7天	9.77	9.77	2020-01-31	#REF!	多动冲动型	3	4	8	1	0	10	13
A21638	ZL21760	86.27		86.27	no	男	2009-01-11	2009-01-25	AGA（适于胎龄儿）	38	0	3200	足月儿	1971-01-27	37	1976-02-02	32	172	72	24.34	158	47	18.83	自然怀孕	顺产	无	未保胎	无		1	1					12岁1月13天	12岁1月13天	12.12	12.12	2020-01-31	#REF!	混合型	1	1	1	0	3	4	5
A22231	ZL22353	107	136	124	no	男	2014-12-23	2014-12-23	AGA（适于胎龄儿）	40	0	3000	足月儿	1978-09-18	36	1982-01-27	32	160	66	25.78	155	53	22.06	自然怀孕	顺产	无	未保胎	无		1	1					6岁2月13天	6岁2月13天	6.2	6.2	2020-01-31	#REF!	多动冲动型	3	4	1	0	0	12	14
A26291	ZL26413	111	108	112	no	男	2011-05-01	2011-05-01	AGA（适于胎龄儿）	40	0	3500	足月儿	1978-01-03	33	1978-09-01	32	173	70	23.39	163	55	20.7	自然怀孕	顺产	无		有		2	2					9岁11月26天	9岁11月26天	9.99	9.99	2020-01-31	#REF!	注意力缺陷型	4	0	0	0	0	13	7
A26516	ZL26638	96	127	112	no	男	2013-02-19	2013-02-19	AGA（适于胎龄儿）	40	0	3300	足月儿	1968-08-06	44	1980-03-10	32	179	75	23.41	171	55	18.81	自然怀孕	顺产	无										8岁2月10天	8岁2月10天	8.19	8.19	2020-01-31	#REF!	混合型	2	4	3	0	0	12	12
A27834	ZL27956	113	100	107	no	女	2012-02-23	2012-02-09	SGA（小于胎龄儿）	42	0	1600	过期产儿	1980-12-29	31	1979-10-02	32	174	70	23.12	160	58	22.66	自然怀孕	剖宫产	无	未保胎	无		1	1					9岁5月1天	9岁5月1天	9.42	9.42	2020-01-31	#REF!	注意力缺陷型	7	0	2	0	1	17	6
A28896	ZL29018	100	77	87	no	男	2014-02-28	2014-02-28	AGA（适于胎龄儿）	40	0	3350	足月儿	1978-11-17	35	1981-10-10	32	184	85	25.11	164	50	18.59	自然怀孕	剖宫产	无	孕早期保胎（怀孕前3月）			1	1					7岁5月0天	7岁5月0天	7.42	7.42	2020-01-31	#REF!	注意力缺陷型	6	2	0	0	0	15	8
A30344	ZL30466	121	70	95	no	男	2012-07-09	2012-07-09	LGA（大于胎龄儿）	40	0	5960	足月儿	1972-05-20	40	1979-12-23	32	167	72.5	51.99	167	57.5	41.23	自然怀孕	顺产	无	未保胎	无		1	1					8岁11月15天	8岁11月15天	8.96	8.96	2020-01-31	#REF!	混合型	9	8	6	2	7	25	20
A31361	ZL31482	87.87		87.87	no	女	2008-04-05	2008-04-05	AGA（适于胎龄儿）	40	0	2888	足月儿	1973-04-14	35	1975-07-23	32		70			46		自然怀孕	剖宫产	无	孕早期保胎（怀孕前3月）	有		1	1					13岁3月0天	13岁3月0天	13.25	13.25	2020-01-31	#REF!	注意力缺陷型	6	1	5	0	0	15	7
A33664	ZL33785	84	133	105	no	男	2014-10-01	2014-10-08	AGA（适于胎龄儿）	39	0	3000	足月儿	1980-01-08	34	1982-06-20	32	170	93	32.18	160	42	16.41	自然怀孕	顺产	无	未保胎	无		4	2					6岁9月26天	6岁9月26天	6.82	6.82	2020-01-31	#REF!	混合型	7	9	5	5	3	21	25
A3385	ZL3512	109	104	107	no	男	2013-06-12	2013-06-19	AGA（适于胎龄儿）	39	0	3000	足月儿	1976-07-01	36	1980-12-04	32	177	102	32.56	170	83	28.72	自然怀孕	顺产	无	未保胎	无	未使用药物	2	2	纯母乳喂养	6	否	3	7岁0月17天	7岁0月17天	7.05	7.05	2020-01-31	#REF!	混合型	3	6	0	0	0	13	21
A35346	ZL35466	103	113	109	no	男	2014-07-23	2014-08-01	AGA（适于胎龄儿）	38	5	3500	足月儿	1979-12-20	34	1981-12-15	32	173	100	33.41	165	75	27.55	自然怀孕	剖宫产	无	孕早期保胎（怀孕前3月）	无		2	1					7岁0月21天	7岁0月21天	7.06	7.06	2020-01-31	#REF!	混合型	3	2	2	0	0	10	11
A40803	ZL40921	65.4		65.4	no	男	2014-12-08	2014-11-28	AGA（适于胎龄儿）	41	3	4200	足月儿	1976-01-30	38	1982-07-05	32	179	85	26.53	172	70	23.66	自然怀孕	顺产	无	未保胎	无		2	2					6岁10月7天	6岁10月7天	6.85	6.85	2020-01-31	#REF!	注意力缺陷型	6	3	0	0	1	19	11
A41241	ZL41359	100	113	106	no	男	2015-04-06	2015-04-06	AGA（适于胎龄儿）	40	0	3655	足月儿	1986-10-16	28	1982-12-02	32	173	65	43.44	158	46	36.85	自然怀孕	顺产	无	未保胎	无		1	1					6岁6月14天	6岁6月14天	6.54	6.54	2020-01-31	#REF!	多动冲动型	3	7	7	1	0	12	16
A43512	ZL43630	111	123	120	no	男	2015-06-28	2015-07-05	AGA（适于胎龄儿）	39	0	3760	足月儿	1981-12-12	33	1983-03-14	32							自然怀孕	顺产					3	1					6岁4月21天	6岁4月21天	6.39	6.39	2020-01-31	#REF!	混合型	3	3	7	1	0	10	10
A44110	ZL44228	107	110	110	no	男	2012-02-24	2012-02-24	AGA（适于胎龄儿）	40	0	3700	足月儿	1978-06-25	33	1979-10-11	32	163	60	22.58	162	60	22.86	自然怀孕	顺产	无	未保胎	无		2	1					9岁9月3天	9岁9月3天	9.76	9.76	2020-01-31	#REF!	混合型	7	8	1	0	0	16	17
A45834	ZL45952	84	93	87	no	女	2015-07-13	2015-07-27	AGA（适于胎龄儿）	38	0	3075	足月儿	1982-02-24	33	1983-01-26	32	172	59	19.94	158	52	20.83	自然怀孕	剖宫产	无	孕早期保胎（怀孕前3月）	有		2	1					6岁5月11天	6岁5月11天	6.45	6.45	2020-01-31	#REF!	注意力缺陷型	6	1	1	0	0	15	10
A54518	ZL54635	93	106	100	no	女	2013-01-28	2013-01-28	AGA（适于胎龄儿）	40	0	3000	足月儿	1980-05-31	32	1980-06-14	32	174	75	24.77	170	55	19.03	自然怀孕	顺产	无	未保胎	无		2	2					9岁5月27天	9岁5月27天	9.49	9.49	2020-01-31	#REF!	注意力缺陷型	4	3	0	0	0	12	9
A6052	ZL6179	91.42		91.42	no	男	2007-07-30	2007-10-22	LGA（大于胎龄儿）	28	0	1600	早产儿	1971-12-11	35	1975-04-01	32	170	80	27.68	160	55	21.48	自然怀孕	顺产	无	孕后期保胎（怀孕7月后）	无	未使用药物	4	2	人工喂养	0	否	2	13岁4月13天	13岁4月13天	13.37	13.37	2020-01-31	#REF!	注意力缺陷型	7	1	3	0	1	17	4
A6240	ZL6367	111.77		111.77	no	男	2011-04-21	2011-04-21	AGA（适于胎龄儿）	40	0	3600	足月儿	1975-06-19	35	1978-11-04	32	175	70	22.86	170	65	22.49	人工授孕/试管婴儿	剖宫产	无	孕早期保胎（怀孕前3月）	无	未使用药物	3	1	纯母乳喂养	10	否	1	9岁3月9天	9岁3月9天	9.27	9.27	2020-01-31	#REF!	注意力缺陷型	2	1	6	1	2	11	8
A7713	ZL7840	73.77		73.77	no	女	2010-04-22	2010-04-29	AGA（适于胎龄儿）	39	0	2850	足月儿	1974-11-20	35	1977-06-26	32	180	85	26.23	166	80	29.03	自然怀孕	剖宫产	无	未保胎	无	未使用药物	1	1	混合喂养（配方奶为主）	2	否	0.5	10岁9月5天	10岁9月5天	10.76	10.76	2020-01-31	#REF!	注意力缺陷型	5	1	0	0	0	14	6
A7983	ZL8110	97.06		97.06	no	男	2010-07-18	2010-08-16	SGA（小于胎龄儿）	35	6	3000	早产儿	1977-12-08	32	1978-02-08	32	178	75	23.67	165	60	22.04	自然怀孕	顺产	无	孕后期保胎（怀孕7月后）	无	未使用药物	2	2	纯母乳喂养	6	否	0.5	10岁2月6天	10岁2月6天	10.18	10.18	2020-01-31	#REF!	混合型	9	6	3	0	0	27	17
A8868	ZL8995	89	90	89	no	男	2012-08-01	2012-08-24	AGA（适于胎龄儿）	36	5	3200	早产儿	1984-10-24	27	1980-06-30	32	180	85	26.23	168	50	17.72	自然怀孕	剖宫产	无	孕早期保胎（怀孕前3月）,孕中期保胎（怀孕4-6月）,孕后期保胎（怀孕7月后）	无	未使用药物	2	1	人工喂养	0	是	3	8岁1月4天	8岁1月4天	8.09	8.09	2020-01-31	#REF!	注意力缺陷型	0	0	0	0	0	8	5
A8909	ZL9036	79.9		79.9	no	男	2012-09-10	2012-10-01	SGA（小于胎龄儿）	37	0	2350	足月儿	1980-12-16	31	1980-03-25	32	174	75	24.77	164	65	24.17	人工授孕/试管婴儿	剖宫产	无	孕后期保胎（怀孕7月后）	无	未使用药物	1	1	混合喂养（配方奶为主）	6	否	1	7岁11月25天	7岁11月25天	7.99	7.99	2020-01-31	#REF!	注意力缺陷型	3	1	0	0	0	10	3
A9781	ZL9904	51.91		51.91	no	男	2016-05-18	2016-05-25	AGA（适于胎龄儿）	39	0	3100	足月儿	1983-04-21	33	1983-09-10	32	171	75	25.65	158	70	28.04	自然怀孕	剖宫产	无	孕早期保胎（怀孕前3月）	无	未使用药物	3	2	纯母乳喂养	13	否	1	4岁3月27天	4岁3月27天	4.32	4.32	2020-01-31	#REF!	混合型	9	9	5	0	0	24	26
A10780	ZL10903	92.3		92.3	no	男	2013-10-02	2013-10-02	AGA（适于胎龄儿）	40	0	3700	足月儿	1988-12-08	31	1987-04-21	33	167	72	25.82	156	50	20.55	自然怀孕	剖宫产	无	未保胎	无	未使用药物	1	1	混合喂养（母乳为主）	0	是	0	6岁11月22天	6岁11月22天	6.98	6.98	2020-01-31	#REF!	混合型	9	9	6	6	1	24	24
A11458	ZL11581	126	125	130	no	男	2015-06-16	2015-06-16	AGA（适于胎龄儿）	40	0	3550	足月儿	1982-02-21	33	1982-04-18	33	165	69	25.34	152	46	19.91	自然怀孕	顺产	无	孕早期保胎（怀孕前3月）	无	调节甲状腺激素类药物	2	1	纯母乳喂养	23	是	1	5岁3月19天	5岁3月19天	5.3	5.3	2020-01-31	#REF!	混合型	7	6	0	0	0	17	15
A11668	ZL11791	94	79	86	no	男	2014-06-10	2014-06-13	SGA（小于胎龄儿）	39	4	3200	足月儿	1977-09-22	36	1980-08-14	33	177	80	25.54	162	52	19.81	自然怀孕	剖宫产	无	未保胎	无	未使用药物	2	1	人工喂养	1	否	0.5	6岁3月27天	6岁3月27天	6.32	6.32	2020-01-31	#REF!	混合型	7	9	3	0	0	18	21
A11896	ZL12019	100	98	99	no	男	2012-05-07	2012-05-07	LGA（大于胎龄儿）	40	0	4200	足月儿	1976-10-28	35	1979-03-12	33	173	70	23.39	165	65	23.88	自然怀孕	剖宫产	无	孕早期保胎（怀孕前3月）,孕中期保胎（怀孕4-6月）	无	未使用药物	2	1	纯母乳喂养	12	否	2	8岁5月1天	8岁5月1天	8.42	8.42	2020-01-31	#REF!	混合型	8	8	6	0	1	20	20
A13164	ZL13287	129.84		129.84	no	男	2015-11-14	2015-11-30	AGA（适于胎龄儿）	37	5	2745	足月儿	1981-07-16	34	1982-08-03	33	165	70	25.71	162	57	21.72	自然怀孕	顺产	无	未保胎	无	未使用药物	1	1	混合喂养（母乳为主）	7	是	0.5	4岁11月9天	4岁11月9天	4.94	4.94	2020-01-31	#REF!	混合型	7	7	2	1	3	18	15
A13470	ZL13593	67	79	70	no	男	2016-03-16	2016-03-21	AGA（适于胎龄儿）	39	2	3800	足月儿	1978-09-23	37	1982-11-26	33	180	95	58.64	160	57.5	44.92	自然怀孕	剖宫产	无	未保胎	无	未使用药物	3	2	混合喂养（配方奶为主）	1	否	3.5	5岁8月2天	5岁8月2天	5.67	5.67	2020-01-31	#REF!	混合型	5	6	0	0	0	15	17
A13494	ZL13617	119	105	115	no	男	2013-02-14	2013-02-14	AGA（适于胎龄儿）	40	0	3250	足月儿	1979-11-03	33	1979-06-13	33	173		21.72	163		19.2	自然怀孕	剖宫产	无	未保胎	无	未使用药物	3	1	混合喂养（配方奶为主）	2	是	1	7岁8月13天	7岁8月13天	7.7	7.7	2020-01-31	#REF!	混合型	6	6	0	0	3	15	16
A14764	ZL14887	92	93	91	no	男	2013-04-13	2013-04-27	AGA（适于胎龄儿）	38	0	3300	足月儿	1982-05-13	30	1979-06-24	33	172	70	47.32	162	52	19.81	自然怀孕	剖宫产	无	未保胎	无	未使用药物	1	1	纯母乳喂养	10	否	0.5	7岁6月27天	7岁6月27天	7.57	7.57	2020-01-31	#REF!	混合型	9	9	2	0	0	24	22
A14872	ZL14995	87	104	94	no	男	2009-11-21	2009-12-19	AGA（适于胎龄儿）	36	0	2590	早产儿	1982-02-16	38	1987-09-28	33	178	65	20.52	164	50	18.59	自然怀孕	顺产	无	未保胎	有	未使用药物	2	1	人工喂养	0	是	1.5	10岁11月20天	10岁11月20天	10.97	10.97	2020-01-31	#REF!	混合型	4	4	0	0	3	13	13
A17865	ZL17987	95.85		95.85	no	男	2013-08-07	2013-08-30	SGA（小于胎龄儿）	36	5	2000	早产儿	1978-11-18	34	1979-12-06	33							自然怀孕	顺产					1	1					7岁4月12天	7岁4月12天	7.37	7.37	2020-01-31	#REF!	注意力缺陷型	4	1	1	0	0	13	7
A20706	ZL20828	76	114	95	no	女	2015-07-17	2015-08-07	SGA（小于胎龄儿）	37	0	1200	足月儿	1979-12-20	35	1982-03-25	33	170			157			自然怀孕	顺产	无	未保胎	无		2	1					5岁6月17天	5岁6月17天	5.55	5.55	2020-01-31	#REF!	混合型	3	4	5	1	1	11	10
A21217	ZL21339	75.91		75.91	yes	男	2009-06-17	2009-06-17	AGA（适于胎龄儿）	40	0	3200	足月儿	1979-03-15	30	1976-03-10	33	176	73	23.57	179	61	19.04	自然怀孕	顺产	无	孕早期保胎（怀孕前3月）	无		4	1					11岁8月0天	11岁8月0天	11.67	11.67	2020-01-31	#REF!	注意力缺陷型	5	2	0	0	2	14	11
A22988	ZL23110	70	93	79	no	男	2016-05-23	2016-05-23	AGA（适于胎龄儿）	40	0	3400	足月儿	1979-01-07	37	1982-12-10	33	182	78	23.55	160	55	21.48	自然怀孕	顺产	无	未保胎,孕早期保胎（怀孕前3月）,孕中期保胎（怀孕4-6月）	无		2	2					4岁9月23天	4岁9月23天	4.81	4.81	2020-01-31	#REF!	多动冲动型	3	7	1	0	0	12	16
A24363	ZL24485	73.14		73.14	no	女	2015-10-23	2015-10-23	SGA（小于胎龄儿）	40	0	2750	足月儿	1980-01-30	35	1982-01-01	33																			5岁5月9天	5岁5月9天	5.44	5.44	2020-01-31	#REF!	混合型	9	6	1	0	0	22	18
A24732	ZL24854	101	110	105	no	男	2013-05-17	2013-05-17	AGA（适于胎龄儿）	40	0	3500	足月儿	1970-03-21	43	1980-02-26	33	184	98	28.95	172	67	22.65	自然怀孕	顺产	无	未保胎	无		2	2					7岁10月27天	7岁10月27天	7.91	7.91	2020-01-31	#REF!	混合型	9	5	4	0	1	24	15
A25641	ZL25763	98	101	100	no	男	2014-06-20	2014-07-11	AGA（适于胎龄儿）	37	0	2800	足月儿	1981-01-01	33	1981-01-05	33	174	70	23.12	166	70	25.4	人工授孕/试管婴儿	剖宫产	无	孕中期保胎（怀孕4-6月）	无		1	1					6岁9月26天	6岁9月26天	6.82	6.82	2020-01-31	#REF!	注意力缺陷型	6	1	0	0	0	15	9
A28718	ZL28840	88	86	86	no	男	2015-03-27	2015-03-27	AGA（适于胎龄儿）	40	0	3250	足月儿	1979-09-01	35	1981-12-28	33	164.5	69.5	25.68	156	53	21.78	自然怀孕	剖宫产	无	未保胎	无		2	2					6岁2月5天	6岁2月5天	6.18	6.18	2020-01-31	#REF!	混合型	5	7	1	2	0	16	17
A29485	ZL29607	118	112	118	no	女	2013-10-18	2013-10-11	AGA（适于胎龄儿）	41	0	4200	足月儿	1972-11-05	40	1979-11-27	33	174	75	24.77	158	55	22.03	自然怀孕	剖宫产	无	孕早期保胎（怀孕前3月）	无		2	1					7岁9月17天	7岁9月17天	7.8	7.8	2020-01-31	#REF!	注意力缺陷型	5	3	3	0	0	14	8
A34890	ZL35010	100	119	109	no	女	2012-08-24	2012-08-24	SGA（小于胎龄儿）	40	0	2400	足月儿	1976-08-20	36	1978-12-25	33	170			162			自然怀孕	顺产	无	未保胎,孕早期保胎（怀孕前3月）	无		1	1					8岁11月16天	8岁11月16天	8.96	8.96	2020-01-31	#REF!	注意力缺陷型	6	4	3	0	0	19	12
A35734	ZL35854	77	83	77	no	女	2014-10-27	2014-11-03	LGA（大于胎龄儿）	39	0	4300	足月儿	1972-10-23	42	1981-08-13	33	181	95	29	172			自然怀孕	剖宫产	无	孕早期保胎（怀孕前3月）									6岁9月22天	6岁9月22天	6.81	6.81	2020-01-31	#REF!	注意力缺陷型	5	2	0	0	0	16	8
A3516	ZL3643	91	87	88	no	女	2010-12-09	2010-12-09	AGA（适于胎龄儿）	40	0	3700	足月儿	1975-06-29	35	1977-07-31	33	190	75	20.78	165	56	20.57	自然怀孕	剖宫产	无	孕早期保胎（怀孕前3月）	无	其他	3	1	混合喂养（母乳为主）	2	否	1.5	10岁6月13天	10岁6月13天	10.54	10.54	2020-01-31	#REF!	注意力缺陷型	3	1	0	0	0	11	7
A39265	ZL39383	80	106	90	no	男	2015-02-05	2015-02-05	SGA（小于胎龄儿）	40	0	2600	足月儿	1978-09-13	36	1981-12-30	33									无										6岁8月2天	6岁8月2天	6.67	6.67	2020-01-31	#REF!	混合型	8	9	4	2	0	18	24
A41709	ZL41827	84.43		84.43	no	男	2013-10-20	2013-11-17	LGA（大于胎龄儿）	36	0	4900	早产儿	1971-12-08	41	1979-11-17	33																			8岁0月5天	8岁0月5天	8.01	8.01	2020-01-31	#REF!	混合型	3	3	0	0	0	8	9
A44953	ZL45071	101	101	102	no	男	2014-06-20	2014-07-11	SGA（小于胎龄儿）	37	0	1650	足月儿	1981-09-28	32	1981-01-13	33	174	80	26.42	167	70	25.1	人工授孕/试管婴儿	剖宫产	无	未保胎,孕早期保胎（怀孕前3月）,孕中期保胎（怀孕4-6月）	无		1	1					7岁5月21天	7岁5月21天	7.47	7.47	2020-01-31	#REF!	注意力缺陷型	5	3	0	0	0	14	11
A45662	ZL45780	83.73		83.73	no	男	2014-06-11	2014-06-17	AGA（适于胎龄儿）	39	1	3960	足月儿	1975-10-06	38	1981-01-23	33	170	72	24.91	160	50	19.53	人工授孕/试管婴儿	剖宫产	无	孕早期保胎（怀孕前3月）	无		2	1					7岁6月11天	7岁6月11天	7.53	7.53	2020-01-31	#REF!	多动冲动型	4	3	1	0	0	12	14
A46955	ZL47073	77	102	87	no	男	2015-07-02	2015-06-29	AGA（适于胎龄儿）	40	3	3600	足月儿	1978-12-21	36	1982-04-18	33	170	70	24.22	163	65	24.46	自然怀孕	剖宫产	无	孕早期保胎（怀孕前3月）	有		2	1					6岁7月5天	6岁7月5天	6.6	6.6	2020-01-31	#REF!	混合型	2	0	2	0	0	9	7
A47877	ZL47995	64	93	76	no	男	2016-05-05	2016-05-05	SGA（小于胎龄儿）	40	0	1925	足月儿	1982-08-16	33	1982-08-19	33																			5岁9月3天	5岁9月3天	5.76	5.76	2020-01-31	#REF!	多动冲动型	0	3	1	0	0	7	12
A47984	ZL48102	126	100	115	no	男	2012-03-21	2012-03-21	AGA（适于胎龄儿）	40	0	4000	足月儿	1977-01-10	35	1978-04-20	33	175	70	22.86	165	70	25.71	自然怀孕	剖宫产	无	孕早期保胎（怀孕前3月）	无		2	1					9岁10月6天	9岁10月6天	9.85	9.85	2020-01-31	#REF!	混合型	9	5	4	0	0	27	15
A50095	ZL50213	93	82	86	no	男	2015-08-28	2015-08-28	AGA（适于胎龄儿）	40	0	3500	足月儿	1982-10-11	32	1982-03-30	33	176	90	29.05	167	60	21.51	自然怀孕	剖宫产	无	未保胎	无		1	1					6岁6月10天	6岁6月10天	6.53	6.53	2020-01-31	#REF!	多动冲动型	0	2	0	0	0	6	10
A10701	ZL10824	92	125	106	no	男	2014-02-12	2014-02-16	AGA（适于胎龄儿）	39	3	3100	足月儿	1977-07-01	36	1979-08-13	34	180	70	21.6	155	48	19.98	自然怀孕	剖宫产	无	未保胎	无	未使用药物	1	1	纯母乳喂养	10	否	2	6岁7月12天	6岁7月12天	6.62	6.62	2020-01-31	#REF!	混合型	4	3	0	0	0	12	11
A11327	ZL11450	62	87	71	no	男	2015-07-24	2015-07-31	AGA（适于胎龄儿）	39	0	3100	足月儿	1974-06-27	41	1981-03-17	34	160	56	21.87	165	65	23.88	自然怀孕	剖宫产	无	未保胎	有	未使用药物	4	2	纯母乳喂养	12	是	1	5岁2月12天	5岁2月12天	5.2	5.2	2020-01-31	#REF!	混合型	0	0	0	0	0	8	8
A11773	ZL11896	116	98	108	no	男	2013-02-17	2013-02-12	AGA（适于胎龄儿）	40	5	3659	足月儿	1978-02-17	35	1979-01-28	34	172	76	25.69	168	62	21.97	自然怀孕	剖宫产	无	未保胎	无	未使用药物	1	1	纯母乳喂养	12	是	2	7岁7月19天	7岁7月19天	7.64	7.64	2020-01-31	#REF!	注意力缺陷型	6	1	1	0	0	18	4
A11787	ZL11910	122	110	120	no	女	2014-05-29	2014-05-31	AGA（适于胎龄儿）	39	5	3750	足月儿	1977-08-10	36	1979-12-28	34	178	70	22.09	164	80	29.74	人工授孕/试管婴儿	剖宫产	无	孕早期保胎（怀孕前3月）	无	未使用药物	1	1	纯母乳喂养	14	否	2	6岁4月10天	6岁4月10天	6.36	6.36	2020-01-31	#REF!	混合型	7	8	2	1	1	20	20
A13111	ZL13234	75.75		75.75	no	男	2013-01-14	2013-01-21	AGA（适于胎龄儿）	39	0	3300	足月儿	1978-11-20	34	1978-02-06	34	171	75	25.65	155	65	27.06	自然怀孕	顺产	无	孕早期保胎（怀孕前3月）	无	未使用药物	2	1	纯母乳喂养	7	否	0	7岁9月9天	7岁9月9天	7.77	7.77	2020-01-31	#REF!	混合型	1	2	0	0	0	8	8
A13294	ZL13417	115	75	94	no	男	2011-07-13	2011-07-29	AGA（适于胎龄儿）	37	5	2900	足月儿	1977-12-16	33	1977-01-27	34	167	75	26.89	165	60	22.04	自然怀孕	剖宫产	无	孕早期保胎（怀孕前3月）	无	其他	1	1	人工喂养	0	是	1.5	9岁3月13天	9岁3月13天	9.29	9.29	2020-01-31	#REF!	注意力缺陷型	4	4	3	0	0	13	12
A13839	ZL13962	108.13		108.13	yes	女	2009-06-24	2009-07-22	LGA（大于胎龄儿）	36	0	6300	早产儿	1970-01-05	39	1975-06-14	34	175	65	21.22	168	60	21.26	自然怀孕	剖宫产	无	未保胎	无	未使用药物	3	1	人工喂养	0	否	0.5	11岁4月6天	11岁4月6天	11.35	11.35	2020-01-31	#REF!	注意力缺陷型	0	0	0	0	0	7	3
A14395	ZL14518	108.32		108.32	no	男	2016-11-29	2016-12-11	AGA（适于胎龄儿）	38	2	3000	足月儿	1977-04-17	39	1982-06-19	34	175	80	26.12	156	47	19.31	自然怀孕	顺产	无	未保胎	无	调节甲状腺激素类药物	2	2	混合喂养（母乳为主）	2	是	1	4岁	4岁	4.01	4.01	2020-01-31	#REF!	混合型	1	3	2	0	0	8	7
A15068	ZL15190	101	100	101	no	男	2014-02-22	2014-02-22	AGA（适于胎龄儿）	40	0	4000	足月儿	1975-12-28	38	1979-03-19	34	172	70	23.66	165	62	22.77	自然怀孕	顺产	无	孕早期保胎（怀孕前3月）	无	未使用药物	1	1	混合喂养（母乳为主）	13	是	0	6岁8月19天	6岁8月19天	6.72	6.72	2020-01-31	#REF!	混合型	4	8	8	3	2	14	23
A16218	ZL16340	77.1		77.1	no	男	2013-09-25	2013-09-25	AGA（适于胎龄儿）	40	0	3240	足月儿	1977-09-08	36	1979-05-06	34													1	1					7岁2月2天	7岁2月2天	7.17	7.17	2020-01-31	#REF!	混合型	5	6	1	1	0	14	19
A17124	ZL17246	104	96	102	no	女	2012-05-04	2012-05-04	AGA（适于胎龄儿）	40	0	3750	足月儿	1976-12-16	35	1977-10-26	34	170	60	20.76	165	50	36.73	自然怀孕	顺产			无		1	1					8岁7月5天	8岁7月5天	8.6	8.6	2020-01-31	#REF!	注意力缺陷型	7	1	0	0	0	18	7
A18167	ZL18289	84	82	81	no	女	2011-04-23	2011-04-23	SGA（小于胎龄儿）	40	0	4000	足月儿	1977-10-01	33	1976-11-20	34	180	100	61.73	170	67.5	46.71	自然怀孕	顺产		未保胎	无		2	1					9岁8月0天	9岁8月0天	9.67	9.67	2020-01-31	#REF!	混合型	3	2	3	0	0	9	8
A21652	ZL21774	102	82	91	no	男	2012-08-20	2012-08-20	AGA（适于胎龄儿）	40	0	3600	足月儿	1974-12-26	37	1978-07-12	34	185	68	19.87	163	55	41.4	自然怀孕	剖宫产	无	孕中期保胎（怀孕4-6月）	有		6	2					8岁6月4天	8岁6月4天	8.51	8.51	2020-01-31	#REF!	混合型	6	9	4	2	2	19	26
A24361	ZL24483	106.69		106.69	no	女	2016-12-20	2016-12-20	AGA（适于胎龄儿）	40	0	3000	足月儿	1979-12-04	37	1982-01-27	34	168	75	53.15	153	60	51.26	自然怀孕	剖宫产	无	未保胎	无		2	2					4岁4月2天	4岁4月2天	4.34	4.34	2020-01-31	#REF!	混合型	0	0	1	0	0	4	2
A24543	ZL24665	103	89	96	yes	男	2009-08-25	2009-09-01	AGA（适于胎龄儿）	39	0	3900	足月儿	1976-10-30	32	1975-04-23	34	172	70	23.66	160	70	27.34	自然怀孕	剖宫产	无	孕早期保胎（怀孕前3月）	有		2	2					11岁8月16天	11岁8月16天	11.71	11.71	2020-01-31	#REF!	注意力缺陷型	6	1	5	0	0	18	11
A25649	ZL25771	124	119	126	no	男	2013-11-08	2013-11-08	AGA（适于胎龄儿）	40	0	2980	足月儿	1968-12-26	44	1979-10-12	34	181	80	24.42	163	60	45.17	自然怀孕	剖宫产	无	未保胎	无		1	1					7岁5月8天	7岁5月8天	7.44	7.44	2020-01-31	#REF!	多动冲动型	2	5	2	0	0	11	15
A37536	ZL37656	101	108	104	no	男	2014-01-15	2014-01-15	AGA（适于胎龄儿）	40	0	4000	足月儿	1986-09-30	27	1979-12-12	34	174	90	29.73	156	45	18.49	自然怀孕	剖宫产	无	未保胎	无		1	1					7岁7月22天	7岁7月22天	7.64	7.64	2020-01-31	#REF!	注意力缺陷型	4	2	0	0	0	14	7
A43859	ZL43977	132	131	138	no	男	2013-08-24	2013-08-24	AGA（适于胎龄儿）	40	0	4070	足月儿	1981-12-05	31	1978-12-27	34	160	76	29.69	160	75	29.3	自然怀孕	顺产	无	未保胎	无		3	2					8岁2月30天	8岁2月30天	8.25	8.25	2020-01-31	#REF!	注意力缺陷型	7	4	4	0	0	21	11
A46243	ZL46361	62.86		62.86	no	女	2018-08-06	2018-08-15	AGA（适于胎龄儿）	38	5	3300	足月儿	1984-08-11	34	1984-04-14	34	176	95	30.67	165	57	20.94	人工授孕/试管婴儿	剖宫产	无	孕早期保胎（怀孕前3月）	无		1	2					4岁	4岁	4	4	2020-01-31	#REF!	混合型	7	6	0	0	0	20	17
A46540	ZL46658	70.15		70.15	no	男	2013-12-24	2014-01-02	AGA（适于胎龄儿）	38	5	3340	足月儿	1979-04-16	34	1979-11-02	34	178	80	25.25	160	60	23.44	人工授孕/试管婴儿	顺产	无	未保胎	有		2	2					8岁0月12天	8岁0月12天	8.03	8.03	2020-01-31	#REF!	注意力缺陷型	5	2	3	0	0	14	9
A49726	ZL49844	117.67		117.67	no	男	2017-08-28	2017-08-28	SGA（小于胎龄儿）	40	0	2750	足月儿	1984-08-17	33	1983-06-29	34	170	85	29.41	163	65	24.46	自然怀孕	剖宫产	无	未保胎	有		2	2					4岁5月28天	4岁5月28天	4.49	4.49	2020-01-31	#REF!	混合型	0	0	0	0	0	4	1
A9504	ZL9630	93	90	90	no	男	2014-05-18	2014-05-25	LGA（大于胎龄儿）	39	0	3750	足月儿	1975-09-09	38	1980-02-06	34	165	55	20.2	155	55	22.89	自然怀孕	顺产	产伤	孕中期保胎（怀孕4-6月）	无	未使用药物	2	1	纯母乳喂养	23	否	1	6岁3月24天	6岁3月24天	6.32	6.32	2020-01-31	#REF!	多动冲动型	4	6	7	0	0	12	15
A14134	ZL14257	88	92	89	no	男	2013-03-22	2013-04-12	LGA（大于胎龄儿）	37	0	3550	足月儿	1976-05-04	36	1977-08-14	35	177	85	27.13	156	55	22.6	自然怀孕	顺产	无	未保胎	无	未使用药物	1	1	人工喂养	0	否	0	7岁7月12天	7岁7月12天	7.62	7.62	2020-01-31	#REF!	混合型	1	1	0	0	0	4	3
A15107	ZL15229	105.36		105.36	no	男	2011-07-19	2011-07-28	AGA（适于胎龄儿）	38	5	3740	足月儿	1972-05-16	39	1975-09-12	35	173	78	26.06	164	60	22.31	自然怀孕	剖宫产	无	未保胎	无		2	1					9岁3月26天	9岁3月26天	9.32	9.32	2020-01-31	#REF!	注意力缺陷型	2	1	1	0	1	11	6
A17115	ZL17237	115	126	124	no	女	2012-06-25	2012-06-25	AGA（适于胎龄儿）	40	0	3130	足月儿	1972-06-09	40	1977-05-07	35	171	55	18.81	153	53	22.64	自然怀孕	剖宫产	无	未保胎	无		3	1					8岁5月14天	8岁5月14天	8.46	8.46	2020-01-31	#REF!	混合型	6	5	4	0	0	18	19
A19655	ZL19777	87	96	90	no	男	2012-02-22	2012-02-22	AGA（适于胎龄儿）	40	0	3650	足月儿	1971-09-01	40	1976-09-30	35	171	71	48.56	160	65	50.78	自然怀孕	顺产	无	未保胎	有		2	2					8岁10月22天	8岁10月22天	8.89	8.89	2020-01-31	#REF!	注意力缺陷型	8	2	4	0	0	24	9
A22974	ZL23096	107	105	107	no	男	2011-09-14	2011-09-22	LGA（大于胎龄儿）	38	6	3800	足月儿	1973-09-03	38	1976-03-01	35	168	65	46.06	158	54	43.26	自然怀孕	剖宫产	无	未保胎	有		1	1					9岁6月1天	9岁6月1天	9.5	9.5	2020-01-31	#REF!	注意力缺陷型	4	2	3	0	1	11	7
A33672	ZL33793	104.19		104.19	no	男	2009-04-17	2009-04-17	AGA（适于胎龄儿）	40	0	3400	足月儿	1975-10-15	33	1974-03-12	35	178	80	25.25	163	53	19.95	自然怀孕	剖宫产	其他	未保胎	无		3	1					12岁3月10天	12岁3月10天	12.28	12.28	2020-01-31	#REF!	混合型	7	8	8	8	7	20	20
A35115	ZL35235	110	113	114	no	男	2014-06-27	2014-07-19	AGA（适于胎龄儿）	36	6	2850	早产儿	1987-02-11	27	1979-01-05	35	185	105	30.68	170	60	20.76	自然怀孕	剖宫产	无	未保胎	有		1	1					7岁1月14天	7岁1月14天	7.12	7.12	2020-01-31	#REF!	混合型	9	7	0	0	0	21	18
A37867	ZL37987	86	93	88	no	女	2014-10-14	2014-10-14	SGA（小于胎龄儿）	40	0	3150	足月儿	1983-03-13	31	1979-08-08	35	175	85	27.76	158	48	19.23	自然怀孕	剖宫产	无	未保胎	有		1	1					6岁10月27天	6岁10月27天	6.91	6.91	2020-01-31	#REF!	混合型	4	4	3	0	0	13	13
A6398	ZL6525	90	99	94	no	男	2015-09-14	2015-10-08	AGA（适于胎龄儿）	36	4	3050	早产儿	1974-11-10	40	1980-07-10	35	182	61	18.42	162	48	18.29	人工授孕/试管婴儿	剖宫产	无	孕中期保胎（怀孕4-6月）	无	未使用药物	1	1	混合喂养（母乳为主）	1	否	0	4岁10月17天	4岁10月17天	4.88	4.88	2020-01-31	#REF!	多动冲动型	0	3	0	0	0	3	11
A10222	ZL10345	103.11		103.11	no	男	2015-03-21	2015-03-21	AGA（适于胎龄儿）	40	0	3300	足月儿	1975-12-25	39	1979-01-18	36	170	88	30.45	164	56	20.82	自然怀孕	顺产	无	孕后期保胎（怀孕7月后）	无	未使用药物	2	2	纯母乳喂养	15	否	0	5岁5月28天	5岁5月28天	5.49	5.49	2020-01-31	#REF!	注意力缺陷型	3	0	1	0	0	12	6
A10682	ZL10805	124	110	121	no	男	2010-04-16	2010-06-11	LGA（大于胎龄儿）	32	0	2950	早产儿	1969-12-24	40	1973-12-14	36	182	80	241516.73	173	70	233886.87	自然怀孕	剖宫产	缺氧窒息	未保胎	无	未使用药物	1	1	混合喂养（配方奶为主）	3	否	0.5	10岁5月29天	10岁5月29天	10.5	10.5	2020-01-31	#REF!	注意力缺陷型	5	3	5	1	0	15	10
A11948	ZL12071	83	83	81	no	男	2011-08-19	2011-08-19	AGA（适于胎龄儿）	40	0	3800	足月儿	1969-04-04	42	1975-01-01	36	175	80	26.12	165	49	18	自然怀孕	剖宫产	无	未保胎	无	未使用药物	1	1	纯母乳喂养	6	否	1.5	9岁3月8天	9岁3月8天	9.27	9.27	2020-01-31	#REF!	注意力缺陷型	2	1	0	0	0	7	4
A21174	ZL21296	102	117	110	no	女	2013-08-11	2013-08-11	AGA（适于胎龄儿）	40	0	3650	足月儿	1973-11-25	39	1977-06-08	36	181	80	24.42	174	65	21.47	自然怀孕	顺产	无	未保胎	无		3	2					7岁6月5天	7岁6月5天	7.51	7.51	2020-01-31	#REF!	混合型	6	4	0	0	1	17	13
A22630	ZL22752	64	105	82	no	男	2013-04-04	2013-05-02	AGA（适于胎龄儿）	36	0	2660	早产儿	1971-01-24	42	1976-10-31	36	176	65	20.98	163	70	26.35	自然怀孕	剖宫产	无	未保胎	有		10	2					7岁11月6天	7岁11月6天	7.93	7.93	2020-01-31	#REF!	混合型	6	8	1	1	0	19	20
A22631	ZL22753	72	90	77	no	男	2013-04-04	2013-05-02	AGA（适于胎龄儿）	36	0	2630	早产儿	1971-01-24	42	1976-10-31	36	176	65	20.98	163	70	26.35	自然怀孕	剖宫产	缺氧窒息	未保胎	有		10	3					7岁11月6天	7岁11月6天	7.93	7.93	2020-01-31	#REF!	混合型	9	9	3	1	0	20	24
A22688	ZL22810	88.75		88.75	no	男	2011-02-18	2011-02-18	AGA（适于胎龄儿）	40	0	4020	足月儿	1978-06-15	32	1974-05-07	36	170	80	27.68	160	65	25.39	自然怀孕	剖宫产			无								10岁0月21天	10岁0月21天	10.06	10.06	2020-01-31	#REF!	注意力缺陷型	5	2	4	1	0	13	11
A23167	ZL23289	96	109	102	no	男	2016-05-05	2016-05-17	AGA（适于胎龄儿）	38	2	3230	足月儿	1982-06-14	33	1980-03-15	36	168	60	21.26	155	50	20.81	自然怀孕	剖宫产	无	未保胎	无		2	2					4岁10月12天	4岁10月12天	4.87	4.87	2020-01-31	#REF!	多动冲动型	0	7	2	0	0	7	19
A23591	ZL23713	100	98	99	no	男	2013-02-22	2013-03-15	LGA（大于胎龄儿）	37	0	2400	足月儿	1973-05-25	39	1977-02-26	36	175	75	24.49	160	55	21.48	自然怀孕	剖宫产	无	孕早期保胎（怀孕前3月）	无		2	1					8岁1月0天	8岁1月0天	8.08	8.08	2020-01-31	#REF!	混合型	2	3	6	0	1	9	10
A29364	ZL29486	99	123	112	no	男	2015-10-08	2015-10-15	AGA（适于胎龄儿）	39	0	3065	足月儿	1976-12-22	38	1978-11-28	36	174			160			自然怀孕	剖宫产	无	未保胎	无		1	1					5岁9月18天	5岁9月18天	5.8	5.8	2020-01-31	#REF!	混合型	7	9	6	0	0	18	22
A41786	ZL41904	140	112	132	no	男	2016-01-07	2016-01-21	LGA（大于胎龄儿）	38	0	4300	足月儿	1978-05-01	37	1980-01-01	36																			5岁9月19天	5岁9月19天	5.8	5.8	2020-01-31	#REF!	多动冲动型	2	6	0	0	0	10	15
A45405	ZL45523	101	79	89	no	女	2015-05-13	2015-05-20	AGA（适于胎龄儿）	39	0	3330	足月儿	1974-04-09	41	1979-04-28	36	178	77	24.3	168	53	18.78	自然怀孕	剖宫产	其他	未保胎	有		1	1					6岁7月5天	6岁7月5天	6.6	6.6	2020-01-31	#REF!	混合型	8	7	1	0	1	24	18
A60860	ZL60977	74.1		74.1	no	男	2014-02-13	2014-02-27	LGA（大于胎龄儿）	38	0	4500	足月儿	1975-11-28	38	1978-01-14	36							人工授孕/试管婴儿	剖宫产	无	孕早期保胎（怀孕前3月）	无		3	1					8岁7月22天	8岁7月22天	8.64	8.64	2020-01-31	#REF!	注意力缺陷型	5	4	1	0	0	12	8
A10235	ZL10358	106	95	102	no	男	2013-04-27	2013-06-22	AGA（适于胎龄儿）	32	0	2000	早产儿	1981-02-13	32	1976-01-18	37	168	75	26.57	168	70	24.8	自然怀孕	剖宫产	无	未保胎	无	降压药	1	1	人工喂养	0	否	2	7岁4月21天	7岁4月21天	7.39	7.39	2020-01-31	#REF!	注意力缺陷型	8	1	2	0	5	24	8
A13659	ZL13782	84	72	76	no	男	2014-12-25	2014-12-29	SGA（小于胎龄儿）	39	3	2680	足月儿	1974-02-01	40	1977-07-02	37	174	70	23.12	160	46	17.97	自然怀孕	顺产	无	未保胎	无	未使用药物	1	1	混合喂养（配方奶为主）	0	否	0.5	5岁10月4天	5岁10月4天	5.84	5.84	2020-01-31	#REF!	多动冲动型	2	9	2	0	0	9	21
A13789	ZL13912	78.9		78.9	no	男	2012-04-27	2012-04-24	AGA（适于胎龄儿）	40	3	3900	足月儿	1963-05-30	48	1974-08-05	37	169	80	28.01	157	51.5	20.89	自然怀孕	剖宫产	无	孕早期保胎（怀孕前3月）	无	未使用药物	1	1	人工喂养	0	否	0.5	8岁6月3天	8岁6月3天	8.51	8.51	2020-01-31	#REF!	注意力缺陷型	5	4	2	0	1	15	10
A15973	ZL16095	102	115	109	no	女	2013-02-22	2013-02-22	AGA（适于胎龄儿）	40	0	3250	足月儿	1970-01-20	43	1975-10-11	37	170	96	33.22	158	80	32.05	自然怀孕	剖宫产	无	未保胎	无		1	1					7岁9月1天	7岁9月1天	7.75	7.75	2020-01-31	#REF!	混合型	7	5	3	0	0	19	17
A16740	ZL16862	86.71		86.71	no	男	2011-05-31	2011-05-31	AGA（适于胎龄儿）	40	0	3500	足月儿	1971-08-22	39	1973-11-05	37	175	90	58.78	170	72.5	50.17	自然怀孕	剖宫产	无	未保胎	无		4	3					9岁6月4天	9岁6月4天	9.51	9.51	2020-01-31	#REF!	注意力缺陷型	4	2	4	0	1	16	10
A16928	ZL17050	56	93	71	no	男	2015-05-19	2015-06-02	AGA（适于胎龄儿）	38	0	3580	足月儿	1976-10-11	38	1977-09-15	37										未保胎	无		2	2					5岁6月19天	5岁6月19天	5.55	5.55	2020-01-31	#REF!	注意力缺陷型	1	0	0	0	0	6	2
A22836	ZL22958	106	126	118	no	男	2014-05-09	2014-05-16	AGA（适于胎龄儿）	39	0	3250	足月儿	1979-07-22	35	1977-08-26	37	170	82	28.37	167	65	23.31	人工授孕/试管婴儿	剖宫产	其他	孕早期保胎（怀孕前3月）	无		1	1					6岁10月3天	6岁10月3天	6.84	6.84	2020-01-31	#REF!	注意力缺陷型	2	1	3	0	0	10	4
A32462	ZL32583	91	83	86	no	男	2010-07-29	2010-08-14	AGA（适于胎龄儿）	37	5	3333	足月儿	1968-12-10	41	1972-09-12	37	173	75	50.12	152	55	47.61	自然怀孕	剖宫产	无	孕早期保胎（怀孕前3月）	无		2	1					10岁11月17天	10岁11月17天	10.96	10.96	2020-01-31	#REF!	混合型	0	0	0	0	0	6	5
A39341	ZL39459	86	83	82	no	男	2014-05-06	2014-05-27	AGA（适于胎龄儿）	37	0	3000	足月儿	1977-03-09	37	1976-09-28	37																			7岁4月23天	7岁4月23天	7.4	7.4	2020-01-31	#REF!	混合型	9	9	7	0	0	21	21
A58822	ZL58939	113.58		113.58	no	女	2016-03-16	2016-03-16	SGA（小于胎龄儿）	40	0	2600	足月儿	1973-01-25	43	1978-06-07	37	170	120	41.52	155	55	45.79	自然怀孕	顺产	无	孕早期保胎（怀孕前3月）	无		2	2					6岁6月1天	6岁6月1天	6.5	6.5	2020-01-31	#REF!	混合型	0	0	0	0	0	5	6
A59846	ZL59963	80	98	86	no	男	2012-11-05	2012-12-10	AGA（适于胎龄儿）	35	0	2080	早产儿	1972-03-18	40	1975-08-29	37	175	70	22.86	170	68	23.53	人工授孕/试管婴儿	剖宫产	无,高胆红素血症,化脓性脑膜炎及其他严重感染	未保胎	有		1	1					10岁0月3天	10岁0月3天	10.01	10.01	2020-01-31	#REF!	混合型	9	6	8	4	2	26	19
A19659	ZL19781	74	111	92	no	男	2017-07-25	2017-08-15	AGA（适于胎龄儿）	37	0	3250	足月儿	1976-12-27	40	1978-10-24	38	179	110	34.33	160	60	23.44	自然怀孕	剖宫产	高胆红素血症	未保胎	无		2						4岁	4岁	4.01	4.01	2020-01-31	#REF!	混合型	1	1	0	0	0	6	4
A26331	ZL26453	93	113	103	no	男	2010-12-14	2010-12-14	AGA（适于胎龄儿）	40	0	3795	足月儿	1972-07-04	38	1972-08-08	38	165	120	44.08	159	61.5	48.65	自然怀孕	剖宫产	其他	未保胎	无		2	2					10岁4月12天	10岁4月12天	10.37	10.37	2020-01-31	#REF!	注意力缺陷型	8	3	1	0	0	22	10
A36413	ZL36533	80	100	87	no	女	2011-07-26	2011-08-04	AGA（适于胎龄儿）	38	5	3400	足月儿	1963-09-04	47	1972-12-13	38									无	未保胎	无		1	1					10岁0月30天	10岁0月30天	10.08	10.08	2020-01-31	#REF!	注意力缺陷型	6	1	4	0	0	16	5
A42829	ZL42947	116	119	121	no	男	2014-07-02	2014-07-02	AGA（适于胎龄儿）	40	0	3500	足月儿	1970-01-10	44	1975-11-25	38	170	80	27.68	163	60	22.58	人工授孕/试管婴儿	剖宫产	无	孕中期保胎（怀孕4-6月）,孕后期保胎（怀孕7月后）	无		1	1					7岁4月8天	7岁4月8天	7.36	7.36	2020-01-31	#REF!	注意力缺陷型	3	1	0	0	0	11	5
A61013	ZL61130	70.96		70.96	no	男	2017-12-13	2017-12-13	AGA（适于胎龄儿）	40	0	3800	足月儿	1978-12-08	40	1980-07-01	38	170	80	27.68	162	55	20.96	自然怀孕	顺产			无		2	2					4岁9月28天	4岁9月28天	4.83	4.83	2020-01-31	#REF!	多动冲动型	1	6	0	0	0	8	14
A15661	ZL15783	94	147	120	no	男	2014-04-27	2014-05-04	AGA（适于胎龄儿）	39	0	2900	足月儿	1975-07-25	38	1974-11-13	39	172	60	20.28	152	52	22.51	自然怀孕	剖宫产	无	未保胎	无		1	1					6岁6月23天	6岁6月23天	6.56	6.56	2020-01-31	#REF!	混合型	1	1	0	0	0	9	10
A29315	ZL29437	107.96		107.96	no	女	2017-05-23	2017-05-23	AGA（适于胎龄儿）	40	0	3000	足月儿	1979-01-01	39	1979-01-04	39	173	70	23.39	165	50	18.37	自然怀孕	剖宫产	无	未保胎	无		2	2					4岁0月17天	4岁0月17天	4.05	4.05	2020-01-31	#REF!	混合型	5	7	0	0	0	17	14
A14566	ZL14689	66	83	71	no	男	2015-04-24	2015-06-24	AGA（适于胎龄儿）	31	2	1750	早产儿	1977-11-17	37	1975-02-28	40	179	95	29.65	167	62	22.23	自然怀孕	顺产	无	未保胎	有	降压药	3	2	人工喂养	1	否	1.5	5岁6月15天	5岁6月15天	5.54	5.54	2020-01-31	#REF!	混合型	8	9	6	1	0	22	25
A13362	ZL13485	67	79	70	no	男	2014-04-26	2014-05-10	LGA（大于胎龄儿）	38	0	4000	足月儿	1961-06-26	52	1972-07-08	41	169	67.5	47.27	162	60	22.86	自然怀孕	剖宫产	无	未保胎	无	未使用药物	1	1	人工喂养	0	否	1	7岁8月24天	7岁8月24天	7.73	7.73	2020-01-31	#REF!	混合型	5	6	1	0	1	15	20
A14318	ZL14441	75.73		75.73	no	男	2011-05-06	2011-05-20	LGA（大于胎龄儿）	38	0	4000	足月儿	1980-08-10	40	1977-01-22	43	176	75	24.21	163	62	23.34	自然怀孕	剖宫产	无	未保胎	无	未使用药物	1	1	纯母乳喂养	10	否	4	9岁5月30天	9岁5月30天	9.5	9.5	2020-01-31	#REF!	混合型	7	7	2	0	0	19	16
A20418	ZL20540	101.19		101.19	no	男	2008-11-21	2008-12-05	AGA（适于胎龄儿）	38	0	3150	足月儿	1968-07-29	40	1965-11-21	43	173	70	23.39	170	60	20.76	自然怀孕	剖宫产	无	孕早期保胎（怀孕前3月）	有		6	2					12岁2月7天	12岁2月7天	12.19	12.19	2020-01-31	#REF!	混合型	0	0	0	0	0	8	6
A7620	ZL7747	104.1		104.1	no	男	2012-07-13	2012-07-27	LGA（大于胎龄儿）	38	0	3825	足月儿	1969-01-17	43	1968-12-06	43	176	60	19.37	170	87	30.1	自然怀孕	剖宫产	无	未保胎	无	未使用药物	1	1	混合喂养（母乳为主）	6	否	1	8岁6月20天	8岁6月20天	8.55	8.55	2020-01-31	#REF!	多动冲动型	2	3	0	0	0	11	13
A18112	ZL18234	99.41		99.41	no	女	2013-02-23	2013-02-23	AGA（适于胎龄儿）	40	0	3000	足月儿	1968-09-03	44	1969-02-12	44	168	68	24.09	157	64	25.96	自然怀孕	顺产	无	未保胎	无		1	1					7岁10月1天	7岁10月1天	7.84	7.84	2020-01-31	#REF!	混合型	0	0	0	0	0	5	3
A11634	ZL11757	73.16		73.16	no	女	2006-07-07	2006-09-15	AGA（适于胎龄儿）	30	0	1500	早产儿	1960-01-23	46	1957-04-02	49	173	80	26.73	160	51	19.92	自然怀孕	顺产	无	未保胎	无	未使用药物	1	1	人工喂养	0	是	0.5	14岁3月6天	14岁3月6天	14.27	14.27	2020-01-31	#REF!	注意力缺陷型	6	2	0	1	0	19	7
A15104	ZL15226	131	98	117	no	女	2014-08-14	2014-09-02	AGA（适于胎龄儿）	37	2	3200	足月儿																							6岁3月0天	6岁3月0天	6.25	6.25	2020-01-31	#REF!	混合型	6	5	0	0	1	16	15
A15219	ZL15341	74	85	76	no	男	2014-08-05	2014-08-11	AGA（适于胎龄儿）	39	1	3330	足月儿																							6岁3月11天	6岁3月11天	6.28	6.28	2020-01-31	#REF!	混合型	8	9	5	0	0	20	23
A15282	ZL15404	92	110	101	no	男	2011-05-12	2011-05-07	AGA（适于胎龄儿）	40	5	3000	足月儿																							9岁6月4天	9岁6月4天	9.51	9.51	2020-01-31	#REF!	注意力缺陷型	9	2	0	0	0	25	6
A15302	ZL15424	89.99		89.99	no	男	2010-08-01	2010-08-07	AGA（适于胎龄儿）	39	1	3100	足月儿																							10岁3月22天	10岁3月22天	10.31	10.31	2020-01-31	#REF!	混合型	9	8	3	0	0	22	18
A15323	ZL15445	103	113	109	no	男	2013-05-09	2013-05-29	AGA（适于胎龄儿）	37	1	2800	足月儿																							7岁6月8天	7岁6月8天	7.52	7.52	2020-01-31	#REF!	注意力缺陷型	5	1	0	0	0	16	10
A15475	ZL15597	89	96	91	no	男	2013-07-12	2013-07-12	AGA（适于胎龄儿）	40	0	3500	足月儿												剖宫产	无	未保胎	无								7岁4月6天	7岁4月6天	7.35	7.35	2020-01-31	#REF!	混合型	8	8	5	0	0	18	20
A15483	ZL15605	87	106	95	no	男	2014-10-29	2014-10-29	AGA（适于胎龄儿）	40	0	3400	足月儿																							6岁0月20天	6岁0月20天	6.05	6.05	2020-01-31	#REF!	混合型	5	8	8	2	0	15	24
A15500	ZL15622	80	79	78	no	男	2015-11-10	2015-11-10	AGA（适于胎龄儿）	40	0	3600	足月儿											自然怀孕	剖宫产	无	未保胎	无		1	1					5岁0月8天	5岁0月8天	5.02	5.02	2020-01-31	#REF!	混合型	6	5	1	0	0	21	16
A15533	ZL15655	60	110	82	no	男	2010-09-27	2010-09-27	AGA（适于胎龄儿）	40	0	3000	足月儿											自然怀孕	剖宫产	无	未保胎	无		1	1					10岁4月4天	10岁4月4天	10.34	10.34	2020-01-31	#REF!	注意力缺陷型	3	2	0	0	0	10	7
A15549	ZL15671	100	93	96	no	男	2011-11-03	2011-11-03	SGA（小于胎龄儿）	40	0	2600	足月儿																	1						9岁2月28天	9岁2月28天	9.24	9.24	2020-01-31	#REF!	注意力缺陷型	8	2	0	1	0	20	12
A15747	ZL15869	91.89		91.89	no	女	2010-06-18	2010-06-18	AGA（适于胎龄儿）	40	0	3400	足月儿											自然怀孕	顺产	无	未保胎	无		1	1					10岁5月3天	10岁5月3天	10.42	10.42	2020-01-31	#REF!	注意力缺陷型	8	1	0	0	0	21	10
A15748	ZL15870	70	63	63	no	男	2013-06-19	2013-06-19	SGA（小于胎龄儿）	40	0	2900	足月儿	1984-08-02	28			175	75	24.49				自然怀孕	剖宫产	无	未保胎	无		1	1					7岁5月2天	7岁5月2天	7.42	7.42	2020-01-31	#REF!	混合型	1	2	2	0	0	7	9
A15752	ZL15874	106.17		106.17	no	男	2008-10-22	2008-11-12	AGA（适于胎龄儿）	37	0	2600	足月儿											自然怀孕	剖宫产	其他	孕早期保胎（怀孕前3月）	无		1	1					12岁0月30天	12岁0月30天	12.08	12.08	2020-01-31	#REF!	注意力缺陷型	7	1	0	0	0	20	5
A15868	ZL15990	90.75		90.75	no	女	2011-11-13	2011-11-13	AGA（适于胎龄儿）	40	0	3000	足月儿																							9岁0月10天	9岁0月10天	9.03	9.03	2020-01-31	#REF!	混合型	7	4	3	0	1	18	15
A15900	ZL16022	98	117	107	no	男	2012-12-31	2012-12-31	AGA（适于胎龄儿）	40	0	3350	足月儿																							7岁10月23天	7岁10月23天	7.9	7.9	2020-01-31	#REF!	混合型	8	8	1	0	0	25	22
A15916	ZL16038	81	89	82	no	男	2013-07-30	2013-08-13	AGA（适于胎龄儿）	38	0	2620	足月儿											人工授孕/试管婴儿	剖宫产	无	未保胎	有		1						7岁3月24天	7岁3月24天	7.32	7.32	2020-01-31	#REF!	注意力缺陷型	7	2	0	0	0	22	9
A15938	ZL16060	104.94		104.94	no	女	2013-02-24	2013-02-24	AGA（适于胎龄儿）	40	0	3150	足月儿												剖宫产											7岁8月27天	7岁8月27天	7.74	7.74	2020-01-31	#REF!	混合型	7	6	6	2	2	20	17
A15972	ZL16094	83.6		83.6	no	女	2012-11-17	2012-11-17	AGA（适于胎龄儿）	40	0	3725	足月儿																							8岁0月11天	8岁0月11天	8.03	8.03	2020-01-31	#REF!	注意力缺陷型	5	2	3	0	0	15	10
A15984	ZL16106	76	77	74	no	男	2016-05-26	2016-05-23	AGA（适于胎龄儿）	40	3	3490	足月儿	1985-01-01	31									自然怀孕	剖宫产	无	未保胎									4岁5月29天	4岁5月29天	4.5	4.5	2020-01-31	#REF!	混合型	6	6	0	0	0	17	18
A16001	ZL16123	64	87	73	no	男	2013-10-28	2013-10-28	SGA（小于胎龄儿）	40	0	3300	足月儿	1985-04-23	29									自然怀孕	顺产	无										7岁0月27天	7岁0月27天	7.07	7.07	2020-01-31	#REF!	混合型	5	8	4	0	1	17	22
A16279	ZL16401	89	106	97	no	女	2012-08-24	2012-08-24	SGA（小于胎龄儿）	40	0	2500	足月儿													无	孕早期保胎（怀孕前3月）	有		3	1					8岁3月3天	8岁3月3天	8.26	8.26	2020-01-31	#REF!	注意力缺陷型	7	2	0	0	1	20	10
A16311	ZL16433	92	86	88	no	男	2012-07-02	2012-06-18	AGA（适于胎龄儿）	42	0	3600	过期产儿																							8岁4月26天	8岁4月26天	8.4	8.4	2020-01-31	#REF!	混合型	6	9	6	1	0	17	22
A16370	ZL16492	88	112	99	no	男	2008-08-07	2008-08-07	SGA（小于胎龄儿）	40	0	3800	足月儿											自然怀孕												12岁3月22天	12岁3月22天	12.31	12.31	2020-01-31	#REF!	注意力缺陷型	2	0	0	0	0	8	1
A16479	ZL16601	86.52		86.52	no	女	2013-08-29	2013-08-29	LGA（大于胎龄儿）	40	0	4800	足月儿	1970-12-07	42									自然怀孕												7岁3月1天	7岁3月1天	7.25	7.25	2020-01-31	#REF!	注意力缺陷型	6	4	4	0	0	14	12
A16540	ZL16662	89	83	84	no	男	2016-10-19	2016-12-14	AGA（适于胎龄儿）	32	0	1850	早产儿	1984-10-29	31									自然怀孕	顺产	无	孕后期保胎（怀孕7月后）	无		2	1					4岁1月13天	4岁1月13天	4.12	4.12	2020-01-31	#REF!	注意力缺陷型	4	3	1	0	0	15	12
A16550	ZL16672	66	91	76	no	男	2016-03-06	2016-03-06	AGA（适于胎龄儿）	40	0	3850	足月儿											自然怀孕	剖宫产	无	孕早期保胎（怀孕前3月）			2	1					4岁8月27天	4岁8月27天	4.74	4.74	2020-01-31	#REF!	混合型	7	9	2	2	0	23	26
A16619	ZL16741	87	77	79	no	男	2008-11-05	2008-11-05	SGA（小于胎龄儿）	40	0	2800	足月儿																	1	1					12岁0月27天	12岁0月27天	12.07	12.07	2020-01-31	#REF!	注意力缺陷型	9	2	0	0	3	27	6
A16703	ZL16825	81.2		81.2	no	男	2017-03-13	2017-03-13	AGA（适于胎龄儿）	40	0	3000	足月儿											自然怀孕	顺产	无	未保胎	无		1	1					4岁	4岁	4	4	2020-01-31	#REF!	注意力缺陷型	0	0	1	0	0	9	6
A16709	ZL16831	92	101	95	no	女	2012-10-26	2012-10-23	SGA（小于胎龄儿）	40	3	2800	足月儿														未保胎	无		2	1					8岁1月8天	8岁1月8天	8.11	8.11	2020-01-31	#REF!	混合型	9	4	1	0	0	26	13
A16727	ZL16849	110.75		110.75	no	男	2013-08-29	2013-08-29	AGA（适于胎龄儿）	40	0	3495	足月儿														未保胎	无		1	1					7岁3月6天	7岁3月6天	7.27	7.27	2020-01-31	#REF!	多动冲动型	1	2	1	0	0	5	10
A16836	ZL16958	82	90	84	no	男	2013-02-10	2013-02-10	AGA（适于胎龄儿）	40	0	3950	足月儿												顺产	无	未保胎	无		1	1					7岁9月23天	7岁9月23天	7.81	7.81	2020-01-31	#REF!	混合型	2	2	0	0	0	10	10
A16962	ZL17084	87	100	91	no	男	2012-07-25	2012-07-25	AGA（适于胎龄儿）	40	0	3500	足月儿											自然怀孕	剖宫产	无	未保胎	有		3	3					8岁4月13天	8岁4月13天	8.37	8.37	2020-01-31	#REF!	混合型	0	1	4	0	0	9	9
A16963	ZL17085	80.4		80.4	no	女	2012-09-07	2012-09-07	AGA（适于胎龄儿）	40	0	3000	足月儿													缺氧窒息	未保胎	无		1	1					8岁3月0天	8岁3月0天	8.25	8.25	2020-01-31	#REF!	注意力缺陷型	5	3	1	0	1	14	10
A16968	ZL17090	93	102	97	no	男	2012-11-19	2012-11-19	SGA（小于胎龄儿）	40	0	3900	足月儿	1997-08-03	15									自然怀孕	剖宫产	无	未保胎	无		1	1					8岁0月19天	8岁0月19天	8.05	8.05	2020-01-31	#REF!	注意力缺陷型	0	0	0	0	0	6	1
A17059	ZL17181	118	108	116	no	男	2014-07-01	2014-07-08	AGA（适于胎龄儿）	39	0	3600	足月儿											人工授孕/试管婴儿	剖宫产	无	未保胎	无		1	1					6岁5月7天	6岁5月7天	6.44	6.44	2020-01-31	#REF!	混合型	4	3	1	0	0	14	13
A17086	ZL17208	117	120	120	no	男	2016-04-29	2016-04-29	AGA（适于胎龄儿）	40	0	3500	足月儿											自然怀孕	顺产	无	未保胎			2	1					4岁7月10天	4岁7月10天	4.61	4.61	2020-01-31	#REF!	混合型	8	9	2	0	0	22	25
A17129	ZL17251	78.92		78.92	no	男	2014-05-19	2014-05-19	AGA（适于胎龄儿）	40	0	3250	足月儿											自然怀孕	顺产	无	未保胎	无		1	1					6岁6月21天	6岁6月21天	6.56	6.56	2020-01-31	#REF!	混合型	2	2	0	0	0	11	9
A17205	ZL17327	101	108	104	no	女	2012-03-12	2012-03-12	SGA（小于胎龄儿）	40	0	3500	足月儿																							8岁8月29天	8岁8月29天	8.75	8.75	2020-01-31	#REF!	注意力缺陷型	7	1	1	0	0	21	2
A17329	ZL17451	103.01		103.01	no	男	2014-08-06	2014-07-30	AGA（适于胎龄儿）	41	0	3950	足月儿																							6岁4月8天	6岁4月8天	6.36	6.36	2020-01-31	#REF!	注意力缺陷型	9	3	3	0	0	19	12
A17414	ZL17536	95	102	99	no	男	2014-08-27	2014-08-27	AGA（适于胎龄儿）	40	0	3000	足月儿	1989-08-08	25			178	80	25.25	170	60	20.76	自然怀孕	剖宫产					1	1					6岁3月18天	6岁3月18天	6.3	6.3	2020-01-31	#REF!	混合型	9	4	2	0	0	24	14
A17559	ZL17681	79	107	92	no	男	2017-03-28	2017-03-28	LGA（大于胎龄儿）	40	0	4900	足月儿																							4岁	4岁	4.01	4.01	2020-01-31	#REF!	多动冲动型	1	4	1	1	0	6	13
A17819	ZL17941	80	120	97	no	男	2012-06-27	2012-07-06	AGA（适于胎龄儿）	38	5	3500	足月儿																							8岁5月21天	8岁5月21天	8.47	8.47	2020-01-31	#REF!	混合型	6	7	0	0	0	20	17
A17902	ZL18024	100.82		100.82	no	男	2013-08-04	2013-08-11	AGA（适于胎龄儿）	39	0	3350	足月儿												顺产	无	未保胎	有		2	2					7岁4月15天	7岁4月15天	7.37	7.37	2020-01-31	#REF!	注意力缺陷型	4	3	0	0	0	13	12
A17946	ZL18068	100	90	94	yes	男	2009-06-08	2009-06-08	AGA（适于胎龄儿）	40	0	3500	足月儿																	1	1					11岁6月13天	11岁6月13天	11.54	11.54	2020-01-31	#REF!	注意力缺陷型	5	2	3	0	0	14	6
A18009	ZL18131	113	93	103	no	女	2013-11-09	2013-11-09	AGA（适于胎龄儿）	40	0	3300	足月儿																							7岁1月12天	7岁1月12天	7.12	7.12	2020-01-31	#REF!	注意力缺陷型	1	0	0	0	0	9	6
A18093	ZL18215	94	82	87	no	男	2011-02-01	2011-03-01	AGA（适于胎龄儿）	36	0	2950	早产儿																	1	1					10岁1月3天	10岁1月3天	10.09	10.09	2020-01-31	#REF!	混合型	8	5	5	0	3	24	14
A18148	ZL18270	115.07		115.07	no	男	2013-11-18	2013-11-18	AGA（适于胎龄儿）	40	0	3750	足月儿																							7岁1月5天	7岁1月5天	7.1	7.1	2020-01-31	#REF!	混合型	8	8	4	0	0	20	22
A18153	ZL18275	95	106	102	no	男	2010-03-21	2010-03-21	AGA（适于胎龄儿）	40	0	3500	足月儿																							10岁9月2天	10岁9月2天	10.76	10.76	2020-01-31	#REF!	多动冲动型	4	6	0	0	0	11	13
A18157	ZL18279	83	93	86	no	男	2014-04-28	2014-05-05	AGA（适于胎龄儿）	39	0	3650	足月儿																							6岁7月25天	6岁7月25天	6.65	6.65	2020-01-31	#REF!	混合型	5	5	7	2	0	19	16
A18247	ZL18369	74.69		74.69	no	男	2014-04-16	2014-04-18	AGA（适于胎龄儿）	39	5	3580	足月儿	1983-01-01	31										顺产					1	1					6岁8月8天	6岁8月8天	6.69	6.69	2020-01-31	#REF!	混合型	6	5	2	1	0	14	14
A18282	ZL18404	126.76		126.76	no	男	2013-03-07	2013-03-07	LGA（大于胎龄儿）	40	0	4400	足月儿																	1	1					7岁9月18天	7岁9月18天	7.8	7.8	2020-01-31	#REF!	混合型	7	4	4	0	0	19	13
A18379	ZL18501	103	100	102	no	男	2014-03-04	2014-03-04	AGA（适于胎龄儿）	40	0	3500	足月儿																	2	2					6岁9月21天	6岁9月21天	6.81	6.81	2020-01-31	#REF!	混合型	4	5	7	0	0	13	18
A18406	ZL18528	81	87	82	yes	男	2009-05-26	2009-05-26	AGA（适于胎龄儿）	40	0	3350	足月儿											自然怀孕	顺产	无	未保胎	无		3	3					11岁7月0天	11岁7月0天	11.58	11.58	2020-01-31	#REF!	注意力缺陷型	5	0	1	0	1	14	9
A18579	ZL18701	70	78	70	no	男	2012-03-16	2012-03-20	AGA（适于胎龄儿）	39	3	3250	足月儿	1983-07-24	28																					9岁0月11天	9岁0月11天	9.03	9.03	2020-01-31	#REF!	注意力缺陷型	9	3	0	0	1	20	10
A18622	ZL18744	89	113	101	no	男	2013-09-13	2013-09-13	AGA（适于胎龄儿）	40	0	3300	足月儿																	1	1					7岁3月16天	7岁3月16天	7.29	7.29	2020-01-31	#REF!	注意力缺陷型	4	2	0	0	0	14	6
A18642	ZL18764	86.66		86.66	no	女	2012-08-19	2012-08-12	LGA（大于胎龄儿）	41	0	6200	足月儿													无	未保胎	无								8岁4月11天	8岁4月11天	8.36	8.36	2020-01-31	#REF!	混合型	9	6	2	1	0	27	19
A18675	ZL18797	98.11		98.11	no	女	2006-08-06	2006-08-06	AGA（适于胎龄儿）	40	0	3000	足月儿																							14岁4月25天	14岁4月25天	14.4	14.4	2020-01-31	#REF!	注意力缺陷型	6	1	1	0	2	15	6
A18742	ZL18864	95	113	103	no	男	2013-04-06	2013-04-06	AGA（适于胎龄儿）	40	0	3900	足月儿													无	未保胎	无		1	1					7岁8月25天	7岁8月25天	7.74	7.74	2020-01-31	#REF!	注意力缺陷型	4	1	0	1	1	15	4
A18775	ZL18897	87	127	104	no	男	2013-10-30	2013-11-24	AGA（适于胎龄儿）	36	3	2750	早产儿																							7岁2月2天	7岁2月2天	7.17	7.17	2020-01-31	#REF!	混合型	7	8	2	0	0	20	21
A18836	ZL18958	105.66		105.66	yes	男	2009-06-23	2009-06-23	AGA（适于胎龄儿）	40	0	3500	足月儿												剖宫产											11岁6月9天	11岁6月9天	11.52	11.52	2020-01-31	#REF!	混合型	9	9	7	2	0	26	25
A18944	ZL19066	65.22		65.22	no	男	2010-07-15	2010-07-15	SGA（小于胎龄儿）	40	0	2800	足月儿																							10岁5月20天	10岁5月20天	10.47	10.47	2020-01-31	#REF!	注意力缺陷型	8	2	4	0	0	21	11
A18970	ZL19092	86	96	89	no	男	2011-07-13	2011-07-13	AGA（适于胎龄儿）	40	0	3050	足月儿																							9岁5月22天	9岁5月22天	9.48	9.48	2020-01-31	#REF!	混合型	9	8	6	0	0	25	24
A19065	ZL19187	112.96		112.96	no	男	2014-12-27	2015-01-10	AGA（适于胎龄儿）	38	0	3065	足月儿																							6岁0月10天	6岁0月10天	6.03	6.03	2020-01-31	#REF!	混合型	7	8	6	2	0	18	21
A19095	ZL19217	75.14		75.14	no	男	2008-08-12	2008-08-12	AGA（适于胎龄儿）	40	0	3150	足月儿																	1	1					12岁11月0天	12岁11月0天	12.92	12.92	2020-01-31	#REF!	注意力缺陷型	3	0	0	0	0	12	1
A19229	ZL19351	103	115	110	no	男	2007-12-15	2007-12-13	AGA（适于胎龄儿）	40	2	3600	足月儿	1984-08-08	23																					13岁0月24天	13岁0月24天	13.07	13.07	2020-01-31	#REF!	注意力缺陷型	8	1	0	0	0	18	9
A19232	ZL19354	94.44		94.44	no	女	2011-11-29	2011-12-06	AGA（适于胎龄儿）	39	0	2950	足月儿																							9岁1月9天	9岁1月9天	9.11	9.11	2020-01-31	#REF!	注意力缺陷型	6	4	0	0	1	17	12
A19240	ZL19362	98	89	93	no	男	2013-12-10	2013-12-24	AGA（适于胎龄儿）	38	0	3350	足月儿																	2	2					7岁0月29天	7岁0月29天	7.08	7.08	2020-01-31	#REF!	混合型	9	8	8	6	1	23	22
A19582	ZL19704	74	90	79	no	男	2011-10-31	2011-10-31	AGA（适于胎龄儿）	40	0	3900	足月儿																							9岁2月14天	9岁2月14天	9.21	9.21	2020-01-31	#REF!	注意力缺陷型	3	2	1	0	0	12	6
A19612	ZL19734	101.83		101.83	no	男	2011-08-21	2011-08-21	SGA（小于胎龄儿）	40	0	2940	足月儿																							9岁4月25天	9岁4月25天	9.4	9.4	2020-01-31	#REF!	注意力缺陷型	1	0	0	0	0	8	4
A19620	ZL19742	115.28		115.28	no	男	2011-08-03	2011-08-03	LGA（大于胎龄儿）	40	0	4750	足月儿															无		1	1					9岁5月12天	9岁5月12天	9.45	9.45	2020-01-31	#REF!	注意力缺陷型	1	0	0	0	0	10	6
A19623	ZL19745	73	96	82	yes	男	2010-01-02	2010-01-23	AGA（适于胎龄儿）	37	0	3300	足月儿																							11岁0月21天	11岁0月21天	11.06	11.06	2020-01-31	#REF!	注意力缺陷型	9	3	4	0	0	26	12
A19632	ZL19754	121.51		121.51	no	男	2010-11-21	2010-11-07	SGA（小于胎龄儿）	42	0	2700	过期产儿														孕早期保胎（怀孕前3月）	无		1	1					10岁1月24天	10岁1月24天	10.15	10.15	2020-01-31	#REF!	注意力缺陷型	5	3	3	0	0	14	11
A19637	ZL19759	88.41		88.41	no	女	2008-08-18	2008-08-25	AGA（适于胎龄儿）	39	0	3650	足月儿													无	未保胎	无		1	1					12岁4月28天	12岁4月28天	12.41	12.41	2020-01-31	#REF!	注意力缺陷型	3	0	0	0	0	12	5
A19645	ZL19767	103	87	95	yes	男	2009-07-03	2009-07-26	SGA（小于胎龄儿）	36	5	2050	早产儿																							11岁6月12天	11岁6月12天	11.53	11.53	2020-01-31	#REF!	注意力缺陷型	6	1	0	0	0	17	7
A19663	ZL19785	78	75	74	no	男	2014-03-18	2014-03-18	AGA（适于胎龄儿）	40	0	3600	足月儿	1985-01-01	29																					6岁9月28天	6岁9月28天	6.83	6.83	2020-01-31	#REF!	注意力缺陷型	1	0	0	0	0	9	4
A19732	ZL19854	119.99		119.99	yes	男	2010-01-05	2010-01-05	AGA（适于胎龄儿）	40	0	3000	足月儿																	1	1					11岁0月11天	11岁0月11天	11.03	11.03	2020-01-31	#REF!	注意力缺陷型	8	3	7	1	0	20	12
A19747	ZL19869	75.63		75.63	no	男	2013-03-12	2013-03-26	AGA（适于胎龄儿）	38	0	3600	足月儿																							7岁10月4天	7岁10月4天	7.84	7.84	2020-01-31	#REF!	混合型	3	3	0	0	0	12	12
A19897	ZL20019	107	113	112	no	男	2012-06-04	2012-06-04	AGA（适于胎龄儿）	40	0	3300	足月儿																							8岁7月15天	8岁7月15天	8.62	8.62	2020-01-31	#REF!	注意力缺陷型	6	3	0	0	0	18	10
A19945	ZL20067	104	105	105	no	男	2013-01-15	2013-01-15	AGA（适于胎龄儿）	40	0	3060	足月儿																							8岁0月4天	8岁0月4天	8.01	8.01	2020-01-31	#REF!	混合型	3	3	6	0	0	11	12
A19955	ZL20077	87	70	76	yes	男	2009-09-08	2009-09-29	AGA（适于胎龄儿）	37	0	2600	足月儿																							11岁4月11天	11岁4月11天	11.36	11.36	2020-01-31	#REF!	注意力缺陷型	7	3	0	0	0	22	12
A19959	ZL20081	91.47		91.47	no	男	2011-03-02	2011-03-07	AGA（适于胎龄儿）	39	2	3850	足月儿																							9岁10月17天	9岁10月17天	9.88	9.88	2020-01-31	#REF!	注意力缺陷型	3	2	1	0	0	12	6
A19964	ZL20086	105.24		105.24	no	男	2011-01-11	2011-01-11	SGA（小于胎龄儿）	40	0	2800	足月儿																							10岁0月8天	10岁0月8天	10.02	10.02	2020-01-31	#REF!	混合型	8	8	3	0	3	22	21
A20012	ZL20134	80	67	70	no	男	2011-12-24	2011-12-24	LGA（大于胎龄儿）	40	0	4500	足月儿																							9岁0月27天	9岁0月27天	9.07	9.07	2020-01-31	#REF!	注意力缺陷型	7	1	0	0	1	19	9
A20042	ZL20164	76.37		76.37	no	男	2010-02-04	2010-02-19	AGA（适于胎龄儿）	37	6	3050	足月儿																							10岁11月16天	10岁11月16天	10.96	10.96	2020-01-31	#REF!	混合型	0	0	0	0	0	3	1
A20065	ZL20187	109	86	98	no	男	2013-08-16	2013-08-16	AGA（适于胎龄儿）	40	0	3500	足月儿																	1	1					8岁9月14天	8岁9月14天	8.79	8.79	2020-01-31	#REF!	混合型	9	5	1	0	1	23	16
A20131	ZL20253	99.72		99.72	no	男	2012-06-20	2012-06-20	AGA（适于胎龄儿）	40	0	3650	足月儿												剖宫产	无	孕早期保胎（怀孕前3月）	无		1	1					8岁7月2天	8岁7月2天	8.59	8.59	2020-01-31	#REF!	注意力缺陷型	6	3	2	0	0	16	10
A20180	ZL20302	89	100	93	no	男	2014-07-22	2014-07-22	AGA（适于胎龄儿）	40	0	3100	足月儿																							6岁6月3天	6岁6月3天	6.51	6.51	2020-01-31	#REF!	注意力缺陷型	9	2	4	0	1	20	11
A20240	ZL20362	115	95	105	no	男	2013-01-11	2013-03-21	AGA（适于胎龄儿）	30	1	1600	早产儿																							8岁0月13天	8岁0月13天	8.04	8.04	2020-01-31	#REF!	注意力缺陷型	4	4	1	0	0	14	12
A20276	ZL20398	88	95	90	no	男	2013-07-02	2013-09-24	LGA（大于胎龄儿）	28	0	2380	早产儿																							7岁6月23天	7岁6月23天	7.56	7.56	2020-01-31	#REF!	注意力缺陷型	4	1	1	0	0	16	4
A20296	ZL20418	93.1		93.1	no	女	2012-02-22	2012-02-22	AGA（适于胎龄儿）	40	0	3500	足月儿					173	85	28.4	165	65	23.88													8岁11月3天	8岁11月3天	8.92	8.92	2020-01-31	#REF!	混合型	4	5	0	0	0	14	14
A20297	ZL20419	80	119	96	no	女	2014-01-14	2014-01-14	AGA（适于胎龄儿）	40	0	3550	足月儿																							7岁0月11天	7岁0月11天	7.03	7.03	2020-01-31	#REF!	混合型	3	2	0	0	1	12	11
A20335	ZL20457	81	100	88	no	女	2011-12-08	2011-12-08	AGA（适于胎龄儿）	40	0	3250	足月儿																							9岁3月30天	9岁3月30天	9.33	9.33	2020-01-31	#REF!	注意力缺陷型	9	1	5	0	1	22	5
A20357	ZL20479	101	112	106	no	女	2014-01-11	2014-01-11	AGA（适于胎龄儿）	40	0	3300	足月儿																							7岁0月15天	7岁0月15天	7.04	7.04	2020-01-31	#REF!	混合型	6	5	3	0	0	16	14
A20411	ZL20533	95.82		95.82	no	男	2011-10-26	2011-11-02	AGA（适于胎龄儿）	39	0	3900	足月儿																							9岁3月2天	9岁3月2天	9.26	9.26	2020-01-31	#REF!	混合型	0	0	0	0	0	5	6
A20412	ZL20534	87	105	94	yes	男	2009-10-31	2009-10-31	AGA（适于胎龄儿）	40	0	3000	足月儿																							11岁2月28天	11岁2月28天	11.24	11.24	2020-01-31	#REF!	混合型	9	4	5	1	1	21	13
A20420	ZL20542	71	103	85	no	男	2015-10-02	2015-10-02	AGA（适于胎龄儿）	40	0	3200	足月儿																							5岁3月26天	5岁3月26天	5.32	5.32	2020-01-31	#REF!	混合型	7	4	3	0	1	19	14
A20427	ZL20549	100.93		100.93	no	男	2012-03-23	2012-03-30	LGA（大于胎龄儿）	39	0	6900	足月儿																							8岁10月5天	8岁10月5天	8.85	8.85	2020-01-31	#REF!	混合型	0	2	5	1	0	9	11
A20502	ZL20624	70.67		70.67	no	男	2012-08-17	2012-08-17	AGA（适于胎龄儿）	40	0	3200	足月儿															有		1						8岁5月12天	8岁5月12天	8.45	8.45	2020-01-31	#REF!	注意力缺陷型	1	0	0	0	0	8	3
A20537	ZL20659	87	78	80	no	男	2013-06-21	2013-06-21	AGA（适于胎龄儿）	40	0	3000	足月儿	1988-02-07	26									自然怀孕	剖宫产											7岁7月9天	7岁7月9天	7.61	7.61	2020-01-31	#REF!	混合型	3	1	1	0	0	6	4
A20582	ZL20704	98	87	92	no	男	2012-08-10	2012-08-18	AGA（适于胎龄儿）	38	6	3000	足月儿	1988-01-01	24																					8岁5月22天	8岁5月22天	8.48	8.48	2020-01-31	#REF!	注意力缺陷型	3	1	0	0	0	11	7
A20617	ZL20739	105.95		105.95	no	男	2010-12-29	2010-12-29	LGA（大于胎龄儿）	40	0	5000	足月儿																							10岁1月4天	10岁1月4天	10.09	10.09	2020-01-31	#REF!	注意力缺陷型	0	0	0	0	0	8	4
A20637	ZL20759	98	83	90	no	男	2012-04-28	2012-04-28	AGA（适于胎龄儿）	40	0	3500	足月儿					175	70	22.86	158	50	20.03													8岁9月4天	8岁9月4天	8.76	8.76	2020-01-31	#REF!	混合型	8	9	4	1	0	19	19
A20654	ZL20776	102	108	105	no	男	2013-03-18	2013-03-25	LGA（大于胎龄儿）	39	0	5800	足月儿												剖宫产											7岁10月15天	7岁10月15天	7.87	7.87	2020-01-31	#REF!	混合型	3	2	1	0	0	9	11
A20667	ZL20789	88	104	94	no	男	2010-04-08	2010-04-08	AGA（适于胎龄儿）	40	0	3000	足月儿																							10岁9月25天	10岁9月25天	10.82	10.82	2020-01-31	#REF!	注意力缺陷型	0	0	0	0	0	9	5
A20669	ZL20791	92.02		92.02	no	男	2010-10-22	2010-11-12	AGA（适于胎龄儿）	37	0	3500	足月儿																							10岁3月12天	10岁3月12天	10.28	10.28	2020-01-31	#REF!	混合型	3	3	1	0	0	12	10
A20764	ZL20886	96	110	103	no	女	2011-06-27	2011-06-20	AGA（适于胎龄儿）	41	0	4000	足月儿																							9岁7月7天	9岁7月7天	9.6	9.6	2020-01-31	#REF!	注意力缺陷型	4	0	0	0	0	13	5
A20832	ZL20954	85.68		85.68	no	男	2012-06-28	2012-07-02	SGA（小于胎龄儿）	39	3	3100	足月儿																							8岁7月8天	8岁7月8天	8.61	8.61	2020-01-31	#REF!	混合型	2	2	1	0	0	9	9
A20834	ZL20956	88.58		88.58	no	男	2011-01-06	2011-01-06	SGA（小于胎龄儿）	40	0	2300	足月儿	1985-01-01	26																					10岁1月0天	10岁1月0天	10.08	10.08	2020-01-31	#REF!	注意力缺陷型	2	0	0	1	0	10	7
A20860	ZL20982	102.93		102.93	no	男	2009-02-06	2009-02-03	AGA（适于胎龄儿）	40	3	3500	足月儿											自然怀孕												12岁0月1天	12岁0月1天	12	12	2020-01-31	#REF!	注意力缺陷型	5	1	0	0	0	14	5
A20896	ZL21018	83.33		83.33	no	男	2011-03-16	2011-03-16	LGA（大于胎龄儿）	40	0	4250	足月儿																							9岁10月23天	9岁10月23天	9.9	9.9	2020-01-31	#REF!	注意力缺陷型	2	0	2	0	0	10	6
A20900	ZL21022	87.77		87.77	no	女	2017-02-06	2017-03-15	LGA（大于胎龄儿）	34	5	4500	早产儿											人工授孕/试管婴儿	剖宫产	无	孕早期保胎（怀孕前3月）	有		1	2					4岁0月2天	4岁0月2天	4.01	4.01	2020-01-31	#REF!	注意力缺陷型	4	1	6	1	2	13	10
A20944	ZL21066	106	89	98	no	男	2012-08-29	2012-09-05	AGA（适于胎龄儿）	39	0	3300	足月儿														孕后期保胎（怀孕7月后）	有		1	1					8岁5月10天	8岁5月10天	4	8.44	2020-01-31	#REF!	注意力缺陷型	9	2	1	0	0	23	9
A21064	ZL21186	110.6		110.6	no	男	2011-01-15	2011-01-15	AGA（适于胎龄儿）	40	0	3330	足月儿	1979-01-01	32																					10岁0月26天	10岁0月26天	10.07	10.07	2020-01-31	#REF!	多动冲动型	2	4	0	0	0	9	12
A21243	ZL21365	84.16		84.16	no	男	2013-07-16	2013-07-16	AGA（适于胎龄儿）	40	0	3250	足月儿																							7岁7月1天	7岁7月1天	7.59	7.59	2020-01-31	#REF!	混合型	4	5	0	0	0	13	16
A21346	ZL21468	102	127	116	no	男	2010-06-28	2010-07-12	AGA（适于胎龄儿）	38	0	3300	足月儿																							10岁7月21天	10岁7月21天	10.64	10.64	2020-01-31	#REF!	混合型	3	2	0	0	0	11	9
A21358	ZL21480	91	108	99	no	男	2012-11-20	2012-11-20	LGA（大于胎龄儿）	40	0	4200	足月儿																							8岁2月29天	8岁2月29天	8.25	8.25	2020-01-31	#REF!	注意力缺陷型	8	2	0	0	0	19	9
A21392	ZL21514	83.57		83.57	no	男	2012-04-19	2012-04-19	AGA（适于胎龄儿）	40	0	3500	足月儿					175	60	19.59	155	45	37.46													9岁1月22天	9岁1月22天	9.14	9.14	2020-01-31	#REF!	混合型	0	0	0	0	0	6	4
A21405	ZL21527	103.13		103.13	no	男	2012-05-26	2012-06-16	AGA（适于胎龄儿）	37	0	3100	足月儿																							8岁8月24天	8岁8月24天	8.73	8.73	2020-01-31	#REF!	混合型	6	6	2	0	0	17	18
A21583	ZL21705	96	93	94	no	男	2012-07-25	2012-08-08	AGA（适于胎龄儿）	38	0	3000	足月儿																							8岁6月29天	8岁6月29天	8.58	8.58	2020-01-31	#REF!	混合型	7	9	7	1	0	21	24
A21852	ZL21974	87	100	91	no	男	2013-06-09	2013-06-09	AGA（适于胎龄儿）	40	0	3150	足月儿					174	70	23.12	158	51	20.43	自然怀孕	顺产	无				1	1					8岁7月28天	8岁7月28天	8.66	8.66	2020-01-31	#REF!	注意力缺陷型	6	4	1	0	0	17	12
A21939	ZL22061	86.56		86.56	no	男	2013-07-15	2013-07-15	AGA（适于胎龄儿）	40	0	3000	足月儿																							7岁7月17天	7岁7月17天	7.63	7.63	2020-01-31	#REF!	混合型	7	7	5	1	0	22	21
A21966	ZL22088	88	110	98	no	男	2010-04-24	2010-04-24	AGA（适于胎龄儿）	40	0	3000	足月儿	1979-01-01	31																					10岁10月7天	10岁10月7天	10.85	10.85	2020-01-31	#REF!	注意力缺陷型	6	3	5	0	0	14	12
A21983	ZL22105	110	117	116	no	男	2013-01-18	2013-01-18	AGA（适于胎龄儿）	40	0	3450	足月儿																							8岁1月15天	8岁1月15天	8.12	8.12	2020-01-31	#REF!	混合型	8	7	6	1	0	21	17
A22087	ZL22209	79.73		79.73	no	男	2011-12-13	2011-12-13	AGA（适于胎龄儿）	40	0	3800	足月儿												顺产	无	孕早期保胎（怀孕前3月）	无		1	1					9岁2月21天	9岁2月21天	9.22	9.22	2020-01-31	#REF!	混合型	7	6	1	0	0	20	16
A22108	ZL22230	88.5		88.5	no	男	2010-11-12	2010-12-03	AGA（适于胎龄儿）	37	0	3000	足月儿																							10岁3月21天	10岁3月21天	10.31	10.31	2020-01-31	#REF!	注意力缺陷型	9	2	4	0	1	19	11
A22150	ZL22272	100	112	105	no	男	2012-06-25	2012-07-08	AGA（适于胎龄儿）	38	1	3400	足月儿																							9岁0月26天	9岁0月26天	9.07	9.07	2020-01-31	#REF!	注意力缺陷型	7	1	2	1	0	20	9
A22185	ZL22307	115	133	128	no	女	2014-11-17	2014-11-17	AGA（适于胎龄儿）	40	0	3500	足月儿																							6岁3月17天	6岁3月17天	6.3	6.3	2020-01-31	#REF!	混合型	6	5	4	0	1	18	17
A22372	ZL22494	88	106	96	no	男	2013-07-11	2013-07-11	SGA（小于胎龄儿）	40	0	2800	足月儿																							7岁7月28天	7岁7月28天	7.66	7.66	2020-01-31	#REF!	多动冲动型	0	3	0	0	0	6	13
A22593	ZL22715	103.33		103.33	no	男	2014-07-23	2014-07-23	LGA（大于胎龄儿）	40	0	3040	足月儿																							6岁7月18天	6岁7月18天	6.63	6.63	2020-01-31	#REF!	多动冲动型	3	6	2	1	0	12	19
A22669	ZL22791	78	100	86	no	女	2015-01-28	2015-02-04	SGA（小于胎龄儿）	39	0	1400	足月儿													无	未保胎	无		2	2					6岁1月14天	6岁1月14天	6.12	6.12	2020-01-31	#REF!	混合型	5	7	3	1	0	16	22
A22818	ZL22940	118	98	109	no	男	2011-10-20	2011-10-13	AGA（适于胎龄儿）	41	0	4000	足月儿	1979-11-01	31															2	1					9岁4月23天	9岁4月23天	9.4	9.4	2020-01-31	#REF!	注意力缺陷型	3	2	5	0	6	13	8
A23381	ZL23503	100.78		100.78	no	女	2011-12-29	2011-12-29	AGA（适于胎龄儿）	40	0	2905	足月儿														未保胎	无		1	1					9岁2月21天	9岁2月21天	9.22	9.22	2020-01-31	#REF!	注意力缺陷型	6	0	0	0	0	16	2
A23444	ZL23566	91.8		91.8	no	男	2008-09-16	2008-09-16	SGA（小于胎龄儿）	40	0	350	足月儿												顺产	无	未保胎	无		1	1					12岁6月4天	12岁6月4天	12.51	12.51	2020-01-31	#REF!	注意力缺陷型	2	1	0	0	0	11	5
A23846	ZL23968	80	79	76	no	女	2014-01-08	2014-01-08	AGA（适于胎龄儿）	40	0	3200	足月儿																							7岁2月17天	7岁2月17天	7.21	7.21	2020-01-31	#REF!	混合型	7	4	5	0	0	18	15
A23848	ZL23970	77.43		77.43	no	男	2016-11-16	2016-11-16	SGA（小于胎龄儿）	40	0	2350	足月儿											人工授孕/试管婴儿	剖宫产	无	孕早期保胎（怀孕前3月）	无		2	1					4岁6月18天	4岁6月18天	4.55	4.55	2020-01-31	#REF!	混合型	8	5	3	0	0	22	16
A23929	ZL24051	86	98	90	no	男	2012-09-07	2012-09-19	AGA（适于胎龄儿）	38	2	3200	足月儿	1985-01-01	27															2	2					8岁6月19天	8岁6月19天	8.55	8.55	2020-01-31	#REF!	注意力缺陷型	2	2	0	0	0	11	5
A23954	ZL24076	89	86	86	no	男	2014-01-27	2014-01-27	SGA（小于胎龄儿）	40	0	3375	足月儿																							7岁1月30天	7岁1月30天	7.17	7.17	2020-01-31	#REF!	混合型	8	9	6	1	0	20	22
A24078	ZL24200	84	112	96	no	男	2012-07-18	2012-07-18	AGA（适于胎龄儿）	40	0	3330	足月儿																							8岁8月11天	8岁8月11天	8.7	8.7	2020-01-31	#REF!	注意力缺陷型	6	1	2	0	1	15	7
A24094	ZL24216	100.91		100.91	no	男	2015-07-15	2015-07-13	AGA（适于胎龄儿）	40	2	3180	足月儿																							5岁8月14天	5岁8月14天	5.71	5.71	2020-01-31	#REF!	混合型	6	6	3	0	0	16	17
A24551	ZL24673	88	98	91	no	男	2014-01-07	2014-01-02	AGA（适于胎龄儿）	40	5	3627	足月儿																							7岁2月26天	7岁2月26天	7.24	7.24	2020-01-31	#REF!	注意力缺陷型	7	3	3	0	2	16	12
A24562	ZL24684	52	55	52	no	女	2014-05-23	2014-05-23	SGA（小于胎龄儿）	40	0	2555	足月儿																							6岁10月11天	6岁10月11天	6.86	6.86	2020-01-31	#REF!	注意力缺陷型	5	1	0	0	0	18	6
A24600	ZL24722	97.32		97.32	yes	男	2009-07-07	2009-07-07	SGA（小于胎龄儿）	40	0	270	足月儿											自然怀孕	剖宫产	无	未保胎	无		1	1					11岁8月27天	11岁8月27天	11.74	11.74	2020-01-31	#REF!	注意力缺陷型	6	0	3	1	0	19	4
A24687	ZL24809	72.74		72.74	no	男	2010-10-21	2010-10-21	AGA（适于胎龄儿）	40	0	3700	足月儿																							10岁5月15天	10岁5月15天	10.46	10.46	2020-01-31	#REF!	注意力缺陷型	6	3	3	1	0	18	12
A24733	ZL24855	95	96	95	no	男	2014-07-08	2014-07-22	AGA（适于胎龄儿）	38	0	3100	足月儿																							6岁8月28天	6岁8月28天	6.74	6.74	2020-01-31	#REF!	注意力缺陷型	7	3	7	1	0	17	12
A24769	ZL24891	109.39		109.39	no	男	2011-08-21	2011-08-21	AGA（适于胎龄儿）	40	0	4000	足月儿																							9岁7月16天	9岁7月16天	9.63	9.63	2020-01-31	#REF!	注意力缺陷型	4	1	0	0	0	13	7
A24789	ZL24911	109	119	116	no	男	2013-07-17	2013-07-17	AGA（适于胎龄儿）	40	0	3500	足月儿																							7岁8月20天	7岁8月20天	7.72	7.72	2020-01-31	#REF!	注意力缺陷型	3	1	0	0	0	13	10
A24807	ZL24929	84	79	80	no	男	2016-12-22	2016-12-22	AGA（适于胎龄儿）	40	0	3500	足月儿																							4岁3月15天	4岁3月15天	4.29	4.29	2020-01-31	#REF!	多动冲动型	2	4	1	0	0	5	13
A24818	ZL24940	111.44		111.44	no	女	2014-01-05	2014-01-05	AGA（适于胎龄儿）	40	0	3800	足月儿														未保胎	无		1	1					7岁6月11天	7岁6月11天	7.53	7.53	2020-01-31	#REF!	混合型	0	0	0	0	0	3	3
A24989	ZL25111	92	96	93	no	男	2013-12-23	2013-12-23	AGA（适于胎龄儿）	40	0	4000	足月儿																							7岁3月17天	7岁3月17天	7.3	7.3	2020-01-31	#REF!	注意力缺陷型	6	2	0	0	0	18	8
A25053	ZL25175	94	98	95	no	男	2012-08-29	2012-08-29	AGA（适于胎龄儿）	40	0	3510	足月儿																	1	1					8岁7月15天	8岁7月15天	8.62	8.62	2020-01-31	#REF!	混合型	9	6	5	2	1	23	16
A25086	ZL25208	110	90	102	no	男	2010-11-04	2010-11-04	AGA（适于胎龄儿）	40	0	3650	足月儿																							10岁5月7天	10岁5月7天	10.44	10.44	2020-01-31	#REF!	混合型	7	6	5	1	4	16	15
A25103	ZL25225	79.27		79.27	no	女	2017-08-02	2017-08-15	SGA（小于胎龄儿）	38	1	2300	足月儿																							4岁3月15天	4岁3月15天	4.29	4.29	2020-01-31	#REF!	混合型	0	2	0	0	0	7	7
A25185	ZL25307	89	80	83	no	女	2014-04-22	2014-04-22	LGA（大于胎龄儿）	40	0	6123	足月儿	1985-01-01	36																					6岁11月19天	6岁11月19天	6.97	6.97	2020-01-31	#REF!	注意力缺陷型	3	1	0	0	0	12	8
A25389	ZL25511	89.96		89.96	no	男	2013-03-15	2013-03-15	AGA（适于胎龄儿）	40	0	3650	足月儿																							8岁0月29天	8岁0月29天	8.08	8.08	2020-01-31	#REF!	混合型	3	2	0	0	0	12	10
A25400	ZL25522	92	112	102	no	男	2013-10-12	2013-10-12	SGA（小于胎龄儿）	40	0	1675	足月儿																							7岁6月2天	7岁6月2天	7.51	7.51	2020-01-31	#REF!	混合型	1	0	0	0	0	6	5
A25626	ZL25748	106	115	112	no	男	2014-07-30	2014-07-30	AGA（适于胎龄儿）	40	0	3000	足月儿					171	80	27.36	168	55	19.49													8岁2月15天	8岁2月15天	8.21	8.21	2020-01-31	#REF!	混合型	8	6	0	1	0	24	15
A25746	ZL25868	102	105	103	no	男	2013-02-03	2013-02-17	LGA（大于胎龄儿）	38	0	4000	足月儿	1984-01-01	29																					8岁2月16天	8岁2月16天	8.21	8.21	2020-01-31	#REF!	混合型	8	8	6	1	2	22	23
A25776	ZL25898	81.94		81.94	no	男	2013-06-18	2013-07-10	LGA（大于胎龄儿）	36	6	3500	早产儿																							7岁10月1天	7岁10月1天	7.84	7.84	2020-01-31	#REF!	混合型	9	3	2	0	0	25	13
A25896	ZL26018	124	86	105	no	男	2011-12-23	2011-12-23	AGA（适于胎龄儿）	40	0	3000	足月儿												剖宫产	无	未保胎	无		2	1					9岁3月28天	9岁3月28天	9.33	9.33	2020-01-31	#REF!	混合型	6	5	3	0	0	15	13
A25913	ZL26035	91	90	89	no	男	2012-09-23	2012-09-23	AGA（适于胎龄儿）	40	0	3600	足月儿	1981-01-01	31									人工授孕/试管婴儿	剖宫产	无	未保胎	无		1	1					8岁6月28天	8岁6月28天	8.58	8.58	2020-01-31	#REF!	注意力缺陷型	8	2	0	0	0	19	8
A26089	ZL26211	91	85	86	no	男	2011-11-10	2011-11-10	AGA（适于胎龄儿）	40	0	3100	足月儿	1985-01-01	26																					9岁5月13天	9岁5月13天	9.45	9.45	2020-01-31	#REF!	混合型	6	4	3	0	0	19	13
A26114	ZL26236	104	108	107	no	男	2014-04-08	2014-04-08	AGA（适于胎龄儿）	40	0	3250	足月儿																	1						7岁0月15天	7岁0月15天	7.04	7.04	2020-01-31	#REF!	注意力缺陷型	5	2	0	0	0	12	5
A26140	ZL26262	89.61		89.61	no	女	2008-07-25	2008-07-25	AGA（适于胎龄儿）	40	0	3500	足月儿																							12岁8月29天	12岁8月29天	12.75	12.75	2020-01-31	#REF!	注意力缺陷型	5	1	5	0	0	17	4
A26161	ZL26283	92	101	95	no	女	2012-12-27	2012-12-27	SGA（小于胎龄儿）	40	0	3950	足月儿	1985-01-01	37									自然怀孕	顺产	无										8岁3月27天	8岁3月27天	8.32	8.32	2020-01-31	#REF!	混合型	0	1	0	0	0	3	4
A26199	ZL26321	76.12		76.12	no	男	2012-03-27	2012-03-27	LGA（大于胎龄儿）	40	0	6800	足月儿																							9岁0月28天	9岁0月28天	9.08	9.08	2020-01-31	#REF!	注意力缺陷型	7	2	0	0	0	18	11
A26274	ZL26396	88	110	98	no	男	2013-09-10	2013-09-10	SGA（小于胎龄儿）	40	0	2850	足月儿												剖宫产	无	未保胎	无								7岁7月16天	7岁7月16天	7.63	7.63	2020-01-31	#REF!	注意力缺陷型	0	0	0	0	0	9	6
A26455	ZL26577	121	106	117	no	男	2013-06-13	2013-06-27	AGA（适于胎龄儿）	38	0	2900	足月儿																							7岁10月15天	7岁10月15天	7.87	7.87	2020-01-31	#REF!	混合型	9	6	5	2	0	24	18
A26525	ZL26647	89	98	92	no	男	2013-05-07	2013-05-21	AGA（适于胎龄儿）	38	0	2950	足月儿																							7岁11月22天	7岁11月22天	7.98	7.98	2020-01-31	#REF!	混合型	8	4	4	0	0	25	16
A26667	ZL26789	87	87	86	no	男	2012-08-26	2012-08-26	AGA（适于胎龄儿）	40	0	3510	足月儿													无	未保胎	无		1	1					8岁8月4天	8岁8月4天	8.68	8.68	2020-01-31	#REF!	多动冲动型	2	4	2	0	1	8	12
A26732	ZL26854	95	120	107	no	女	2012-04-07	2012-04-07	AGA（适于胎龄儿）	40	0	3200	足月儿																							9岁0月26天	9岁0月26天	9.07	9.07	2020-01-31	#REF!	混合型	5	6	4	0	0	17	17
A26777	ZL26899	82	78	77	no	男	2011-07-28	2011-08-08	SGA（小于胎龄儿）	38	3	2800	足月儿																							9岁9月6天	9岁9月6天	9.77	9.77	2020-01-31	#REF!	混合型	8	9	2	1	2	21	25
A2564	ZL2691	76		76	no	女	2013-05-16	2013-06-06	AGA（适于胎龄儿）	37	0	3000	足月儿	1989-04-22		1988-04-03		177	90	28.73	196	56	14.58	自然怀孕	剖宫产	无	孕早期保胎（怀孕前3月）	无	未使用药物	2	1	混合喂养（母乳为主）	6	是	1	7岁7月17天	7岁7月17天	7.63	7.63	2020-01-31	#REF!	混合型	7	6	4	0	0	20	17
A26848	ZL26970	87	96	90	yes	女	2010-06-24	2010-06-24	AGA（适于胎龄儿）	40	0	3900	足月儿																							11岁0月16天	11岁0月16天	11.04	11.04	2020-01-31	#REF!	注意力缺陷型	5	1	0	1	0	14	5
A26927	ZL27049	78	86	79	no	男	2014-07-07	2014-07-07	AGA（适于胎龄儿）	40	0	3500	足月儿																							6岁9月29天	6岁9月29天	6.83	6.83	2020-01-31	#REF!	注意力缺陷型	9	3	1	0	0	23	12
A27043	ZL27165	109	115	114	no	男	2014-08-20	2014-08-20	AGA（适于胎龄儿）	40	0	3650	足月儿												顺产	无	未保胎	无								6岁8月17天	6岁8月17天	6.71	6.71	2020-01-31	#REF!	注意力缺陷型	4	4	1	0	0	15	11
A27196	ZL27318	94	104	99	no	女	2013-06-11	2013-06-24	LGA（大于胎龄儿）	38	1	6400	足月儿																							7岁10月26天	7岁10月26天	7.9	7.9	2020-01-31	#REF!	注意力缺陷型	5	0	2	1	0	14	7
A27352	ZL27474	83.52		83.52	no	男	2014-11-14	2014-11-14	AGA（适于胎龄儿）	40	0	3050	足月儿											自然怀孕	顺产					1	1					6岁5月26天	6岁5月26天	6.49	6.49	2020-01-31	#REF!	多动冲动型	2	4	2	0	0	8	11
A27603	ZL27725	135	115	131	no	男	2013-07-07	2013-07-09	AGA（适于胎龄儿）	39	5	3380	足月儿																							7岁10月6天	7岁10月6天	7.85	7.85	2020-01-31	#REF!	注意力缺陷型	5	1	3	0	0	14	9
A27857	ZL27979	94.13		94.13	no	男	2018-06-20	2018-07-09	AGA（适于胎龄儿）	37	2	2585	足月儿																							4岁4月11天	4岁4月11天	4.36	4.36	2020-01-31	#REF!	多动冲动型	1	2	0	0	0	4	8
A27858	ZL27980	73.41		73.41	no	男	2012-06-01	2012-06-01	AGA（适于胎龄儿）	40	0	4000	足月儿																							9岁4月6天	9岁4月6天	9.35	9.35	2020-01-31	#REF!	注意力缺陷型	3	1	0	0	0	11	7
A28068	ZL28190	106	95	102	no	男	2012-02-16	2012-02-16	AGA（适于胎龄儿）	40	0	3400	足月儿													无	未保胎	无		2	1					9岁3月5天	9岁3月5天	9.26	9.26	2020-01-31	#REF!	多动冲动型	2	4	3	0	0	10	13
A28269	ZL28391	83	82	80	no	男	2014-04-20	2014-04-20	AGA（适于胎龄儿）	40	0	3800	足月儿																							7岁1月4天	7岁1月4天	7.09	7.09	2020-01-31	#REF!	混合型	7	8	5	0	0	19	19
A28303	ZL28425	98.47		98.47	no	男	2012-11-30	2012-12-21	AGA（适于胎龄儿）	37	0	3360	足月儿																							8岁5月25天	8岁5月25天	8.49	8.49	2020-01-31	#REF!	混合型	4	8	4	1	0	13	23
A28680	ZL28802	73	80	74	no	女	2013-11-19	2013-11-19	SGA（小于胎龄儿）	40	0	2700	足月儿																							7岁6月12天	7岁6月12天	7.53	7.53	2020-01-31	#REF!	混合型	9	9	2	0	0	27	23
A28998	ZL29120	95	85	89	no	女	2013-06-10	2013-06-10	AGA（适于胎龄儿）	40	0	3500	足月儿											自然怀孕	顺产	无	未保胎	无		1	1					7岁11月27天	7岁11月27天	7.99	7.99	2020-01-31	#REF!	混合型	1	2	1	0	0	8	6
A29023	ZL29145	88	104	94	no	男	2014-08-15	2014-08-15	AGA（适于胎龄儿）	40	0	3500	足月儿	2011-06-01	3																					6岁9月21天	6岁9月21天	6.81	6.81	2020-01-31	#REF!	混合型	4	8	0	0	0	14	24
A29149	ZL29271	92	110	101	no	男	2014-02-11	2014-02-20	LGA（大于胎龄儿）	38	5	4010	足月儿																							7岁3月24天	7岁3月24天	7.32	7.32	2020-01-31	#REF!	混合型	0	0	1	0	0	6	4
A29203	ZL29325	121	113	121	no	男	2015-05-02	2015-05-02	AGA（适于胎龄儿）	40	0	3100	足月儿																							6岁3月17天	6岁3月17天	6.3	6.3	2020-01-31	#REF!	多动冲动型	1	8	3	0	0	9	24
A29804	ZL29926	87	110	97	no	男	2012-10-15	2012-10-15	AGA（适于胎龄儿）	40	0	3000	足月儿	1977-11-13	34			175	88	28.73				自然怀孕	剖宫产	无		无								8岁8月2天	8岁8月2天	8.67	8.67	2020-01-31	#REF!	混合型	6	6	5	0	0	19	18
A30318	ZL30440	103	93	99	yes	男	2010-04-30	2010-04-30	SGA（小于胎龄儿）	40	0	3400	足月儿																							11岁1月24天	11岁1月24天	11.15	11.15	2020-01-31	#REF!	注意力缺陷型	1	0	0	0	0	9	5
A30369	ZL30491	83	119	99	no	男	2012-12-31	2012-12-24	AGA（适于胎龄儿）	41	0	3500	足月儿																							8岁5月24天	8岁5月24天	8.48	8.48	2020-01-31	#REF!	注意力缺陷型	3	2	1	0	0	13	6
A30431	ZL30553	104	120	114	no	男	2012-08-28	2012-08-28	SGA（小于胎龄儿）	40	0	2800	足月儿																							8岁9月28天	8岁9月28天	8.83	8.83	2020-01-31	#REF!	混合型	4	4	2	0	0	12	12
A30435	ZL30557	99.56		99.56	no	男	2013-06-27	2013-06-27	SGA（小于胎龄儿）	40	0	2500	足月儿	1985-01-01	28																					7岁11月28天	7岁11月28天	7.99	7.99	2020-01-31	#REF!	注意力缺陷型	5	3	0	0	0	15	11
A30541	ZL30662	98	101	100	no	男	2013-07-09	2013-07-09	SGA（小于胎龄儿）	40	0	2560	足月儿															有		1	1					7岁11月17天	7岁11月17天	7.96	7.96	2020-01-31	#REF!	混合型	7	5	4	1	1	19	16
A30649	ZL30770	80	86	81	no	男	2017-05-29	2017-06-12	AGA（适于胎龄儿）	38	0	2960	足月儿																	1	1					4岁0月30天	4岁0月30天	4.08	4.08	2020-01-31	#REF!	混合型	8	6	1	0	0	20	14
A30662	ZL30783	108.15		108.15	no	女	2007-12-19	2007-12-19	AGA（适于胎龄儿）	40	0	3150	足月儿																							13岁6月9天	13岁6月9天	13.52	13.52	2020-01-31	#REF!	注意力缺陷型	6	2	4	1	6	14	6
A30709	ZL30830	87	95	89	no	女	2011-10-19	2011-10-19	AGA（适于胎龄儿）	40	0	3000	足月儿																	1	1					9岁8月9天	9岁8月9天	9.69	9.69	2020-01-31	#REF!	混合型	8	4	4	0	0	22	16
A31015	ZL31136	98	110	103	no	女	2012-01-06	2012-01-06	AGA（适于胎龄儿）	40	0	3500	足月儿																							9岁7月28天	9岁7月28天	9.66	9.66	2020-01-31	#REF!	注意力缺陷型	8	1	4	0	0	17	6
A31032	ZL31153	95	93	94	no	男	2012-08-04	2012-08-04	AGA（适于胎龄儿）	40	0	3500	足月儿											自然怀孕	剖宫产		未保胎	无		2	1					8岁10月28天	8岁10月28天	8.91	8.91	2020-01-31	#REF!	混合型	8	5	0	0	0	19	17
A31039	ZL31160	98	110	103	no	男	2014-02-27	2014-03-03	AGA（适于胎龄儿）	39	3	3200	足月儿																							7岁4月2天	7岁4月2天	7.34	7.34	2020-01-31	#REF!	注意力缺陷型	3	1	1	0	0	11	6
A31228	ZL31349	127.31		127.31	no	男	2014-04-24	2014-04-24	AGA（适于胎龄儿）	40	0	4000	足月儿																							7岁2月21天	7岁2月21天	7.22	7.22	2020-01-31	#REF!	混合型	7	5	1	1	0	19	13
A31456	ZL31577	108.55		108.55	no	男	2011-03-15	2011-03-15	SGA（小于胎龄儿）	40	0	2400	足月儿																							10岁3月22天	10岁3月22天	10.31	10.31	2020-01-31	#REF!	混合型	5	5	3	1	0	15	16
A31494	ZL31615	86	93	88	no	男	2012-11-08	2012-11-08	AGA（适于胎龄儿）	40	0	3200	足月儿														未保胎	无		1	1					8岁7月28天	8岁7月28天	8.66	8.66	2020-01-31	#REF!	混合型	6	8	2	1	0	16	21
A31803	ZL31924	81	68	71	no	女	2014-03-18	2014-03-27	AGA（适于胎龄儿）	38	5	3400	足月儿											自然怀孕	顺产			无		1	1					7岁3月21天	7岁3月21天	7.31	7.31	2020-01-31	#REF!	注意力缺陷型	9	1	0	0	2	25	9
A31871	ZL31992	88	104	94	no	男	2011-09-07	2011-09-07	AGA（适于胎龄儿）	40	0	3650	足月儿																							9岁10月2天	9岁10月2天	9.84	9.84	2020-01-31	#REF!	注意力缺陷型	7	1	1	0	0	18	8
A32099	ZL32220	109	119	116	no	男	2012-02-11	2012-02-11	AGA（适于胎龄儿）	40	0	3000	足月儿																							9岁5月1天	9岁5月1天	9.42	9.42	2020-01-31	#REF!	注意力缺陷型	3	3	1	2	0	13	9
A32230	ZL32351	99.46		99.46	no	男	2009-07-04	2009-07-04	LGA（大于胎龄儿）	40	0	5000	足月儿																	3	1					12岁0月9天	12岁0月9天	12.02	12.02	2020-01-31	#REF!	注意力缺陷型	3	2	0	0	0	11	10
A32593	ZL32714	71.41		71.41	no	女	2011-06-26	2011-06-26	AGA（适于胎龄儿）	40	0	3400	足月儿																							10岁0月20天	10岁0月20天	10.05	10.05	2020-01-31	#REF!	注意力缺陷型	1	0	0	0	0	9	6
A33096	ZL33217	92.72		92.72	no	男	2013-08-20	2013-08-27	AGA（适于胎龄儿）	39	0	3855	足月儿	1980-01-01	33																					7岁11月1天	7岁11月1天	7.92	7.92	2020-01-31	#REF!	多动冲动型	3	5	3	0	0	11	17
A3232	ZL3359	113	92	103	no	男	2010-09-10	2010-09-10	AGA（适于胎龄儿）	40	0	3500	足月儿	1983-08-18		1981-09-17		180	85	26.23	159	48	37.97	自然怀孕	顺产	无	未保胎	无	未使用药物	1	1	纯母乳喂养	8	否	1	9岁10月13天	9岁10月13天	9.87	9.87	2020-01-31	#REF!	注意力缺陷型	4	3	0	0	0	11	7
A33501	ZL33622	89	96	91	no	男	2014-03-11	2014-03-11	AGA（适于胎龄儿）	40	0	3500	足月儿																							7岁4月15天	7岁4月15天	7.37	7.37	2020-01-31	#REF!	混合型	4	5	6	1	1	16	18
A33996	ZL34117	110	113	114	no	男	2014-09-16	2014-09-16	AGA（适于胎龄儿）	40	0	3250	足月儿	1985-01-01	29																					6岁10月14天	6岁10月14天	6.87	6.87	2020-01-31	#REF!	注意力缺陷型	6	3	4	0	1	19	10
A34418	ZL34539	97.58		97.58	no	男	2009-07-05	2009-07-05	AGA（适于胎龄儿）	40	0	3500	足月儿																							12岁0月30天	12岁0月30天	12.08	12.08	2020-01-31	#REF!	混合型	9	8	7	0	0	22	18
A34422	ZL34543	107	98	103	yes	男	2010-07-04	2010-07-11	AGA（适于胎龄儿）	39	0	3200	足月儿																	1	1					11岁1月0天	11岁1月0天	11.08	11.08	2020-01-31	#REF!	注意力缺陷型	8	1	6	1	1	24	6
A34461	ZL34582	111.76		111.76	yes	男	2009-09-17	2009-09-17	AGA（适于胎龄儿）	40	0	3500	足月儿																							11岁10月18天	11岁10月18天	11.88	11.88	2020-01-31	#REF!	注意力缺陷型	4	1	3	0	5	13	5
A3377	ZL3504	70.24		70.24	no	男	2011-12-30	2012-01-06	AGA（适于胎龄儿）	39	0	3600	足月儿	1984-06-30		1983-07-23		183.5	75	22.27	169	56	19.61	自然怀孕	剖宫产	无	孕早期保胎（怀孕前3月）	无	未使用药物	2	1	纯母乳喂养	18	否	0.5	9岁0月20天	9岁0月20天	9.05	9.05	2020-01-31	#REF!	混合型	2	4	1	0	0	10	11
A35018	ZL35138	87	73	77	no	男	2011-02-24	2011-02-24	AGA（适于胎龄儿）	40	0	3500	足月儿																							10岁5月14天	10岁5月14天	10.46	10.46	2020-01-31	#REF!	混合型	6	4	2	1	0	15	14
A35070	ZL35190	96.94		96.94	yes	男	2010-06-21	2010-06-21	LGA（大于胎龄儿）	40	0	7600	足月儿												剖宫产	无	未保胎	无		1	1					11岁1月20天	11岁1月20天	11.14	11.14	2020-01-31	#REF!	注意力缺陷型	9	2	0	0	0	18	6
A35219	ZL35339	113	108	113	no	女	2013-08-31	2013-08-24	AGA（适于胎龄儿）	41	0	3510	足月儿											自然怀孕	顺产	无	未保胎	无		1	1					7岁11月12天	7岁11月12天	7.95	7.95	2020-01-31	#REF!	混合型	8	7	5	0	0	25	23
A35519	ZL35639	102	104	103	yes	女	2010-02-02	2010-02-16	SGA（小于胎龄儿）	38	0	1825	足月儿																							11岁6月17天	11岁6月17天	11.55	11.55	2020-01-31	#REF!	注意力缺陷型	5	0	4	0	1	13	2
A3438	ZL3565	114.68		114.68	no	男	2010-08-24	2010-08-28	AGA（适于胎龄儿）	39	3	3250	足月儿	1982-03-17		1982-05-06		165	60	22.04	162	45	17.15	自然怀孕	顺产	无	未保胎	无	未使用药物	1	1	人工喂养	0	否	0.5	9岁10月5天	9岁10月5天	9.85	9.85	2020-01-31	#REF!	注意力缺陷型	0	0	0	0	0	1	0
A35824	ZL35944	109.42		109.42	no	女	2011-10-14	2011-10-14	AGA（适于胎龄儿）	40	0	3300	足月儿												剖宫产	无	未保胎	无		1	1					10岁2月29天	10岁2月29天	10.25	10.25	2020-01-31	#REF!	注意力缺陷型	6	2	0	0	0	15	7
A35958	ZL36078	86.49		86.49	no	男	2009-08-07	2009-08-21	AGA（适于胎龄儿）	38	0	3100	足月儿																							12岁0月13天	12岁0月13天	12.04	12.04	2020-01-31	#REF!	混合型	9	6	8	3	0	23	19
A36201	ZL36321	67.65		67.65	no	男	2013-10-14	2013-10-14	AGA（适于胎龄儿）	40	0	4000	足月儿																							7岁10月9天	7岁10月9天	7.86	7.86	2020-01-31	#REF!	混合型	7	4	2	0	0	20	13
A36294	ZL36414	111.87		111.87	no	男	2011-08-09	2011-08-09	LGA（大于胎龄儿）	40	0	3960	足月儿											自然怀孕	顺产	无	未保胎	无		1	1					10岁0月15天	10岁0月15天	10.04	10.04	2020-01-31	#REF!	混合型	1	0	6	1	0	6	6
A36341	ZL36461	77	100	86	no	男	2013-02-15	2013-02-15	AGA（适于胎龄儿）	40	0	3200	足月儿												顺产	无	孕后期保胎（怀孕7月后）	无		2	1					8岁6月9天	8岁6月9天	8.52	8.52	2020-01-31	#REF!	注意力缺陷型	9	3	0	0	0	18	10
A36431	ZL36551	83	87	83	no	女	2014-08-16	2014-08-16	SGA（小于胎龄儿）	40	0	3150	足月儿					183	90	26.87	158	55	22.03	自然怀孕	顺产	无	未保胎			1	1					7岁0月9天	7岁0月9天	7.02	7.02	2020-01-31	#REF!	混合型	3	3	8	2	0	12	10
A36738	ZL36858	86.31		86.31	no	男	2018-02-14	2018-02-28	AGA（适于胎龄儿）	38	0	3500	足月儿											自然怀孕	剖宫产	无	未保胎	无		2	2					4岁	4岁	4	4	2020-01-31	#REF!	混合型	2	0	2	0	0	7	7
A36986	ZL37106	84	113	97	no	男	2009-01-05	2009-01-26	AGA（适于胎龄儿）	37	0	3300	足月儿												顺产			无								12岁7月29天	12岁7月29天	12.66	12.66	2020-01-31	#REF!	混合型	5	7	3	0	0	13	15
A3599	ZL3726	90.32		90.32	no	男	2013-07-29	2013-07-29	AGA（适于胎龄儿）	40	0	3400	足月儿	1980-02-16		1983-12-22		168	65	23.03	155	52	21.64	自然怀孕	剖宫产	无	未保胎	无	未使用药物	1	1	混合喂养（配方奶为主）	6	否	3.5	8岁10月2天	8岁10月2天	8.84	8.84	2020-01-31	#REF!	混合型	8	6	6	1	1	24	19
A37298	ZL37418	92	117	103	no	男	2014-01-03	2014-01-24	AGA（适于胎龄儿）	37	0	3000	足月儿											自然怀孕	顺产	无	未保胎	无		1	1					7岁8月0天	7岁8月0天	7.67	7.67	2020-01-31	#REF!	混合型	6	6	2	1	0	16	19
A3626	ZL3753	99.85		99.85	no	女	2011-07-28	2011-08-04	AGA（适于胎龄儿）	39	0	3910	足月儿	1984-02-16		1984-02-14		165	60	22.04	161	53	20.45	自然怀孕	顺产	无	孕早期保胎（怀孕前3月）	无	未使用药物	2	1	混合喂养（母乳为主）	1	是	3	9岁5月23天	9岁5月23天	9.48	9.48	2020-01-31	#REF!	注意力缺陷型	4	3	0	0	0	11	9
A3632	ZL3759	121.99		121.99	no	男	2012-05-30	2012-06-06	AGA（适于胎龄儿）	39	0	3800	足月儿	1985-10-17		1985-12-31		174	85	28.08	165	53	19.47	自然怀孕	顺产	无	未保胎	无	未使用药物	2	1	纯母乳喂养	8	否	0.5	8岁8月18天	8岁8月18天	8.72	8.72	2020-01-31	#REF!	注意力缺陷型	1	0	0	0	0	8	3
A3641	ZL3768	129.81		129.81	no	男	2011-08-04	2011-08-25	AGA（适于胎龄儿）	37	0	3000	足月儿	1968-03-21		1978-01-22		172	81	27.38	163	78	29.36	自然怀孕	剖宫产	无	未保胎	无	未使用药物	1	1	混合喂养（母乳为主）	6	否	3	9岁5月29天	9岁5月29天	9.5	9.5	2020-01-31	#REF!	注意力缺陷型	0	0	0	0	0	7	0
A37644	ZL37764	83	86	82	no	男	2014-11-01	2014-11-28	AGA（适于胎龄儿）	36	1	2200	早产儿																							6岁10月7天	6岁10月7天	6.85	6.85	2020-01-31	#REF!	混合型	3	1	2	0	0	12	10
A37699	ZL37819	109	106	109	no	男	2013-06-01	2013-06-01	SGA（小于胎龄儿）	40	0	2600	足月儿															无								8岁3月8天	8岁3月8天	8.27	8.27	2020-01-31	#REF!	混合型	9	9	0	0	0	22	24
A37820	ZL37940	86	100	90	no	男	2014-07-22	2014-07-22	AGA（适于胎龄儿）	40	0	3600	足月儿											自然怀孕	剖宫产	无	未保胎	无		1	1					7岁1月19天	7岁1月19天	7.14	7.14	2020-01-31	#REF!	混合型	8	4	2	0	0	18	14
A37833	ZL37953	103	108	106	no	男	2013-09-11	2013-09-08	LGA（大于胎龄儿）	40	3	4300	足月儿																							8岁0月1天	8岁0月1天	8	8	2020-01-31	#REF!	混合型	6	7	7	2	0	16	18
A37869	ZL37989	94	115	103	no	男	2013-06-27	2013-06-27	SGA（小于胎龄儿）	40	0	5800	足月儿																							8岁2月13天	8岁2月13天	8.2	8.2	2020-01-31	#REF!	混合型	4	3	2	0	0	12	12
A3688	ZL3815	94.16		94.16	yes	男	2010-08-17	2010-08-07	SGA（小于胎龄儿）	41	3	3000	足月儿	1979-06-26		1982-06-24		178	78	24.62	160	55	21.48	自然怀孕	顺产	无	未保胎	无	未使用药物	1	1	混合喂养（配方奶为主）	2	否	2	11岁0月25天	11岁0月25天	11.07	11.07	2020-01-31	#REF!	注意力缺陷型	7	0	4	0	0	21	4
A38473	ZL38593	101	120	111	no	男	2015-08-25	2015-08-25	LGA（大于胎龄儿）	40	0	4650	足月儿																							6岁0月25天	6岁0月25天	6.07	6.07	2020-01-31	#REF!	注意力缺陷型	3	1	3	1	0	10	7
A38605	ZL38725	100	119	109	no	女	2013-02-07	2013-02-21	AGA（适于胎龄儿）	38	0	2600	足月儿																							8岁7月13天	8岁7月13天	8.62	8.62	2020-01-31	#REF!	混合型	7	4	0	0	0	18	13
A38659	ZL38779	95.12		95.12	no	女	2014-06-27	2014-06-27	SGA（小于胎龄儿）	40	0	6400	足月儿																							7岁2月25天	7岁2月25天	7.24	7.24	2020-01-31	#REF!	混合型	4	1	0	0	0	11	9
A38679	ZL38799	101	94	98	no	男	2017-03-06	2017-04-28	SGA（小于胎龄儿）	32	3	1240	早产儿																							4岁6月16天	4岁6月16天	4.54	4.54	2020-01-31	#REF!	多动冲动型	0	2	0	0	0	5	10
A38770	ZL38890	86	89	86	no	男	2018-04-21	2018-05-04	AGA（适于胎龄儿）	38	1	3200	足月儿											自然怀孕	顺产	无	未保胎	无		1						4岁	4岁	4	4	2020-01-31	#REF!	多动冲动型	3	6	0	0	0	9	15
A38806	ZL38926	81.07		81.07	no	男	2012-03-12	2012-03-12	LGA（大于胎龄儿）	40	0	3600	足月儿													无	孕早期保胎（怀孕前3月）	无		1	1					9岁6月11天	9岁6月11天	9.53	9.53	2020-01-31	#REF!	注意力缺陷型	5	2	3	0	0	14	10
A38830	ZL38950	86	105	94	no	男	2015-12-09	2015-12-09	AGA（适于胎龄儿）	40	0	3000	足月儿																							5岁9月15天	5岁9月15天	5.79	5.79	2020-01-31	#REF!	混合型	2	3	0	0	0	11	11
A38884	ZL39004	113	125	122	no	男	2012-06-25	2012-06-25	AGA（适于胎龄儿）	40	0	3700	足月儿																							9岁2月29天	9岁2月29天	9.25	9.25	2020-01-31	#REF!	注意力缺陷型	4	1	2	0	0	14	6
A39004	ZL39124	79.97		79.97	no	男	2015-03-18	2015-04-01	AGA（适于胎龄儿）	38	0	3000	足月儿																							6岁6月7天	6岁6月7天	6.52	6.52	2020-01-31	#REF!	多动冲动型	3	7	6	1	2	11	21
A39241	ZL39359	97.73		97.73	no	女	2012-01-27	2012-01-27	AGA（适于胎龄儿）	40	0	3500	足月儿	1978-02-01	34																					9岁8月1天	9岁8月1天	9.67	9.67	2020-01-31	#REF!	注意力缺陷型	4	0	0	0	0	12	4
A39364	ZL39482	67.07		67.07	no	男	2014-08-29	2014-08-29	AGA（适于胎龄儿）	40	0	3000	足月儿																							7岁1月1天	7岁1月1天	7.09	7.09	2020-01-31	#REF!	混合型	1	1	1	1	0	9	8
A39418	ZL39536	89.79		89.79	no	男	2014-10-10	2014-10-10	LGA（大于胎龄儿）	40	0	2250	足月儿	1988-12-01	26																					6岁11月20天	6岁11月20天	6.97	6.97	2020-01-31	#REF!	注意力缺陷型	7	2	0	0	4	18	10
A3836	ZL3963	112.87		112.87	yes	男	2009-08-05	2009-08-19	AGA（适于胎龄儿）	38	0	3350	足月儿	1987-06-08		1986-10-08		172	98	33.13	165	66	24.24	自然怀孕	剖宫产	无	未保胎	无	未使用药物	1	1	纯母乳喂养	7	是	1	11岁5月18天	11岁5月18天	11.47	11.47	2020-01-31	#REF!	混合型	3	3	0	1	0	11	10
A39557	ZL39675	104.46		104.46	no	男	2012-12-15	2012-12-15	AGA（适于胎龄儿）	40	0	3050	足月儿																							8岁9月20天	8岁9月20天	8.8	8.8	2020-01-31	#REF!	混合型	8	5	7	1	0	24	15
A39709	ZL39827	93.69		93.69	no	女	2013-06-18	2013-06-18	AGA（适于胎龄儿）	40	0	3480	足月儿	1985-01-01	28																					8岁3月17天	8岁3月17天	8.3	8.3	2020-01-31	#REF!	混合型	6	4	4	0	5	19	13
A39713	ZL39831	109.57		109.57	no	男	2013-02-04	2013-02-04	SGA（小于胎龄儿）	40	0	2140	足月儿																							8岁8月1天	8岁8月1天	8.67	8.67	2020-01-31	#REF!	注意力缺陷型	9	4	1	0	4	24	12
A39719	ZL39837	77.56		77.56	no	女	2012-05-28	2012-05-28	AGA（适于胎龄儿）	40	0	3500	足月儿											自然怀孕	剖宫产			无		1						9岁4月8天	9岁4月8天	9.36	9.36	2020-01-31	#REF!	注意力缺陷型	3	0	0	0	0	12	4
A39846	ZL39964	81	90	83	no	男	2012-02-04	2012-02-04	AGA（适于胎龄儿）	40	0	3000	足月儿												剖宫产											9岁8月2天	9岁8月2天	9.67	9.67	2020-01-31	#REF!	混合型	7	5	0	0	0	21	15
A39973	ZL40091	84	102	91	yes	男	2010-07-22	2010-07-22	AGA（适于胎龄儿）	40	0	4000	足月儿													无	未保胎	无		1	1					11岁2月16天	11岁2月16天	11.21	11.21	2020-01-31	#REF!	混合型	9	8	5	0	0	25	24
A40076	ZL40194	89	82	84	no	男	2012-12-27	2012-12-27	AGA（适于胎龄儿）	40	0	4025	足月儿																							8岁9月11天	8岁9月11天	8.78	8.78	2020-01-31	#REF!	注意力缺陷型	8	1	0	0	0	21	7
A40080	ZL40198	93	99	95	no	男	2016-05-22	2016-06-01	LGA（大于胎龄儿）	38	4	3750	足月儿											自然怀孕	顺产					1	1					5岁4月16天	5岁4月16天	5.38	5.38	2020-01-31	#REF!	注意力缺陷型	5	2	3	0	1	16	11
A40083	ZL40201	89.36		89.36	no	女	2015-08-06	2015-08-12	AGA（适于胎龄儿）	39	1	3480	足月儿																							6岁2月1天	6岁2月1天	6.17	6.17	2020-01-31	#REF!	混合型	7	4	7	0	0	17	15
A40106	ZL40224	94.79		94.79	no	男	2012-07-15	2012-07-15	AGA（适于胎龄儿）	40	0	3000	足月儿																							9岁2月23天	9岁2月23天	9.23	9.23	2020-01-31	#REF!	注意力缺陷型	7	2	0	0	1	19	8
A40134	ZL40252	74	82	75	no	男	2009-07-09	2009-07-09	AGA（适于胎龄儿）	40	0	3200	足月儿											自然怀孕	剖宫产	无	未保胎	无		2	2					12岁2月29天	12岁2月29天	12.25	12.25	2020-01-31	#REF!	混合型	4	6	0	0	0	14	18
A40171	ZL40289	73	66	65	no	男	2015-04-17	2015-04-17	AGA（适于胎龄儿）	40	0	3200	足月儿					177	60	19.15	165	57	20.94	自然怀孕	顺产		未保胎	有		1	1					6岁5月21天	6岁5月21天	6.47	6.47	2020-01-31	#REF!	注意力缺陷型	3	1	0	0	0	12	8
A40406	ZL40524	92.32		92.32	no	男	2015-07-26	2015-08-16	AGA（适于胎龄儿）	37	0	2800	足月儿																							6岁2月16天	6岁2月16天	6.21	6.21	2020-01-31	#REF!	混合型	5	4	0	0	0	17	13
A40591	ZL40709	135	127	138	no	男	2011-07-08	2011-07-08	AGA（适于胎龄儿）	40	0	3550	足月儿	1985-01-01	26															1	1					10岁3月5天	10岁3月5天	10.26	10.26	2020-01-31	#REF!	混合型	8	4	5	1	0	20	14
A40734	ZL40852	105.79		105.79	no	女	2015-11-22	2015-12-06	AGA（适于胎龄儿）	38	0	2800	足月儿	1987-12-09	27															1	1					5岁10月22天	5岁10月22天	5.89	5.89	2020-01-31	#REF!	注意力缺陷型	5	1	0	0	0	16	9
A40844	ZL40962	60	68	61	no	男	2014-05-21	2014-05-21	SGA（小于胎龄儿）	40	0	3400	足月儿																							7岁4月25天	7岁4月25天	7.4	7.4	2020-01-31	#REF!	注意力缺陷型	3	0	0	0	0	11	4
A41402	ZL41520	119	102	113	no	男	2012-07-17	2012-07-26	AGA（适于胎龄儿）	38	5	2800	足月儿																							9岁3月4天	9岁3月4天	9.26	9.26	2020-01-31	#REF!	注意力缺陷型	6	4	7	1	3	16	12
A41480	ZL41598	92	112	102	no	女	2015-04-04	2015-04-18	LGA（大于胎龄儿）	38	0	5800	足月儿					160	60	23.44	160	60	23.44													6岁6月18天	6岁6月18天	6.55	6.55	2020-01-31	#REF!	注意力缺陷型	5	3	0	0	0	12	9
A4068	ZL4195	96.14		96.14	no	男	2012-08-30	2012-09-06	AGA（适于胎龄儿）	39	0	3200	足月儿	1968-02-04		1979-01-22		180	80	24.69	167	70	25.1	自然怀孕	剖宫产	无	孕早期保胎（怀孕前3月）	有	未使用药物	1	1	纯母乳喂养	8	是	0.5	8岁10月20天	8岁10月20天	8.89	8.89	2020-01-31	#REF!	混合型	3	2	0	0	0	12	11
A41940	ZL42058	124	117	125	no	男	2014-07-11	2014-07-25	AGA（适于胎龄儿）	38	0	3050	足月儿												顺产	无	孕早期保胎（怀孕前3月）	无		1	1					7岁3月17天	7岁3月17天	7.3	7.3	2020-01-31	#REF!	混合型	4	5	3	0	0	13	15
A42079	ZL42197	97.05		97.05	no	男	2017-11-21	2017-11-21	AGA（适于胎龄儿）	40	0	3600	足月儿																							4岁	4岁	4.1	4.1	2020-01-31	#REF!	混合型	7	6	3	0	0	16	17
A42227	ZL42345	80	101	88	no	女	2012-06-06	2012-06-06	AGA（适于胎龄儿）	40	0	3750	足月儿												顺产											9岁4月25天	9岁4月25天	9.4	9.4	2020-01-31	#REF!	注意力缺陷型	8	1	4	0	1	21	2
A42245	ZL42363	108.03		108.03	no	男	2015-05-09	2015-05-09	SGA（小于胎龄儿）	40	0	2800	足月儿																							6岁5月23天	6岁5月23天	6.48	6.48	2020-01-31	#REF!	混合型	5	3	2	0	0	15	13
A42417	ZL42535	122	92	108	no	男	2015-01-25	2015-01-25	AGA（适于胎龄儿）	40	0	3600	足月儿					171	75	25.65	161	50	19.29							2	2					6岁9月9天	6岁9月9天	6.77	6.77	2020-01-31	#REF!	混合型	5	6	1	0	0	15	16
A42643	ZL42761	102	106	104	no	女	2015-08-03	2015-08-07	AGA（适于胎龄儿）	39	3	3400	足月儿											自然怀孕	顺产	产伤	未保胎	无		2	1					6岁3月3天	6岁3月3天	6.26	6.26	2020-01-31	#REF!	混合型	4	3	0	0	0	11	12
A42675	ZL42793	91	110	100	yes	男	2010-10-23	2010-11-17	AGA（适于胎龄儿）	36	3	2800	早产儿																							11岁0月22天	11岁0月22天	11.06	11.06	2020-01-31	#REF!	混合型	4	4	0	0	0	15	14
A42688	ZL42806	78	120	96	no	男	2015-04-27	2015-04-28	AGA（适于胎龄儿）	39	6	3900	足月儿																							6岁7月11天	6岁7月11天	6.61	6.61	2020-01-31	#REF!	注意力缺陷型	5	5	6	1	2	15	11
A42981	ZL43099	92	108	100	no	男	2013-05-04	2013-04-27	SGA（小于胎龄儿）	41	0	2900	足月儿																							8岁6月7天	8岁6月7天	8.52	8.52	2020-01-31	#REF!	注意力缺陷型	8	3	0	1	0	23	11
A43027	ZL43145	105.96		105.96	no	男	2015-05-31	2015-06-07	AGA（适于胎龄儿）	39	0	3100	足月儿																	1	1					6岁5月12天	6岁5月12天	6.45	6.45	2020-01-31	#REF!	注意力缺陷型	5	2	0	0	0	16	8
A43119	ZL43237	98	127	113	no	男	2013-12-26	2013-12-26	SGA（小于胎龄儿）	40	0	3750	足月儿																							7岁10月18天	7岁10月18天	7.88	7.88	2020-01-31	#REF!	注意力缺陷型	4	4	1	0	0	13	12
A43191	ZL43309	93.06		93.06	no	男	2017-06-14	2017-06-14	SGA（小于胎龄儿）	40	0	3700	足月儿														孕早期保胎（怀孕前3月）	无		2	2					4岁6月13天	4岁6月13天	4.54	4.54	2020-01-31	#REF!	混合型	4	4	0	1	0	13	16
A43235	ZL43353	100	117	108	no	男	2012-10-21	2012-10-26	AGA（适于胎龄儿）	39	2	3450	足月儿											自然怀孕	顺产	无	未保胎	无		1	1					9岁0月25天	9岁0月25天	9.07	9.07	2020-01-31	#REF!	混合型	8	7	4	0	0	23	21
A43276	ZL43394	48	55	49	no	男	2014-01-25	2014-01-25	AGA（适于胎龄儿）	40	0	3600	足月儿												顺产	无	未保胎	无		2	2					7岁9月22天	7岁9月22天	7.81	7.81	2020-01-31	#REF!	混合型	9	4	3	0	0	26	15
A4215	ZL4342	111.78		111.78	no	女	2013-07-09	2013-07-09	AGA（适于胎龄儿）	40	0	3100	足月儿	1988-05-10		1987-02-21		182	112	33.81	152	45	19.48	自然怀孕	顺产	无	未保胎	无	未使用药物	1	1	纯母乳喂养	6	否	1	6岁11月30天	6岁11月30天	7	7	2020-01-31	#REF!	注意力缺陷型	7	1	0	0	0	19	6
A43368	ZL43486	89.36		89.36	no	男	2014-05-22	2014-05-22	AGA（适于胎龄儿）	40	0	3990	足月儿																	1	1					7岁5月26天	7岁5月26天	7.49	7.49	2020-01-31	#REF!	混合型	9	9	7	1	0	21	25
A43396	ZL43514	77.65		77.65	no	男	2014-11-22	2014-11-22	AGA（适于胎龄儿）	40	0	3350	足月儿												顺产	无	未保胎	无		1	1					6岁11月25天	6岁11月25天	6.99	6.99	2020-01-31	#REF!	混合型	0	0	0	0	0	2	2
A43435	ZL43553	89	93	90	no	男	2013-01-21	2013-01-21	AGA（适于胎龄儿）	40	0	3700	足月儿																							8岁9月28天	8岁9月28天	8.83	8.83	2020-01-31	#REF!	混合型	7	4	2	1	0	20	14
A4229	ZL4356	106.49		106.49	no	男	2012-05-15	2012-06-19	AGA（适于胎龄儿）	35	0	2970	早产儿	1983-05-03		1983-04-04		179	85	26.53	174	82	27.08	自然怀孕	顺产	其他	孕早期保胎（怀孕前3月）,孕中期保胎（怀孕4-6月）,孕后期保胎（怀孕7月后）	无	未使用药物	2	1	纯母乳喂养	6	否	1.5	8岁1月24天	8岁1月24天	8.15	8.15	2020-01-31	#REF!	混合型	9	9	7	1	2	23	24
A4238	ZL4365	99.61		99.61	no	男	2010-07-09	2010-07-07	LGA（大于胎龄儿）	40	2	6130	足月儿	1974-12-21		1981-07-16		172	75	25.35	170	70	24.22	自然怀孕	顺产	无	未保胎	无	未使用药物	4	1	纯母乳喂养	11	否	3	9岁11月30天	9岁11月30天	10	10	2020-01-31	#REF!	注意力缺陷型	4	1	0	0	0	11	3
A43940	ZL44058	77.48		77.48	no	男	2016-11-28	2016-11-28	AGA（适于胎龄儿）	40	0	3500	足月儿																							4岁11月26天	4岁11月26天	4.99	4.99	2020-01-31	#REF!	混合型	1	0	0	0	0	5	4
A4385	ZL4512	113.94		113.94	no	男	2010-08-24	2010-09-07	LGA（大于胎龄儿）	38	0	6400	足月儿	1977-08-16		1980-06-06		170	65	22.49	160	45	17.58	自然怀孕	顺产	无	未保胎	无	未使用药物	3	1	混合喂养（母乳为主）	1	否	0.5	10岁10月5天	10岁10月5天	10.85	10.85	2020-01-31	#REF!	混合型	1	0	2	0	1	9	8
A45375	ZL45493	80	90	82	no	男	2013-04-15	2013-04-15	SGA（小于胎龄儿）	40	0	3250	足月儿	1987-01-01	26																					8岁8月3天	8岁8月3天	8.67	8.67	2020-01-31	#REF!	注意力缺陷型	6	2	1	0	0	14	8
A45396	ZL45514	86	101	91	no	男	2008-12-20	2009-01-24	AGA（适于胎龄儿）	35	0	2700	早产儿																							12岁11月29天	12岁11月29天	13	13	2020-01-31	#REF!	混合型	3	2	0	0	0	9	7
A45630	ZL45748	92.85		92.85	no	男	2013-04-16	2013-04-16	AGA（适于胎龄儿）	40	0	3500	足月儿																							8岁8月6天	8岁8月6天	8.68	8.68	2020-01-31	#REF!	混合型	9	6	4	0	1	22	15
A46233	ZL46351	78.27		78.27	no	男	2013-01-22	2013-03-26	AGA（适于胎龄儿）	31	0	1530	早产儿																							8岁11月9天	8岁11月9天	8.94	8.94	2020-01-31	#REF!	混合型	5	5	1	0	0	14	16
A46927	ZL47045	96	89	92	no	男	2014-06-05	2014-06-12	SGA（小于胎龄儿）	39	0	3600	足月儿																	2	2					7岁7月7天	7岁7月7天	7.6	7.6	2020-01-31	#REF!	混合型	5	5	1	1	0	14	14
A47039	ZL47157	79.16		79.16	no	男	2012-02-10	2012-03-11	AGA（适于胎龄儿）	35	5	2500	早产儿	1980-01-01	32																					9岁11月3天	9岁11月3天	9.92	9.92	2020-01-31	#REF!	注意力缺陷型	3	0	0	0	0	8	3
A47046	ZL47164	101.47		101.47	no	男	2012-05-25	2012-05-25	AGA（适于胎龄儿）	40	0	3300	足月儿																							9岁7月19天	9岁7月19天	9.64	9.64	2020-01-31	#REF!	混合型	0	0	0	0	0	3	4
A47272	ZL47390	70	98	81	yes	男	2010-04-19	2010-04-19	AGA（适于胎龄儿）	40	0	3000	足月儿	1982-10-26	27																					11岁8月29天	11岁8月29天	11.75	11.75	2020-01-31	#REF!	注意力缺陷型	6	1	1	3	1	17	8
A47359	ZL47477	83	93	86	no	男	2014-07-07	2014-07-14	AGA（适于胎龄儿）	39	0	3300	足月儿																							8岁0月5天	8岁0月5天	8.01	8.01	2020-01-31	#REF!	注意力缺陷型	9	2	2	0	1	24	11
A47587	ZL47705	119	126	127	no	男	2013-09-25	2013-09-25	LGA（大于胎龄儿）	40	0	4350	足月儿																							8岁3月26天	8岁3月26天	8.32	8.32	2020-01-31	#REF!	多动冲动型	3	7	5	0	0	11	16
A47933	ZL48051	122	117	124	no	男	2012-10-05	2012-10-04	LGA（大于胎龄儿）	40	1	4400	足月儿																							9岁5月5天	9岁5月5天	9.43	9.43	2020-01-31	#REF!	注意力缺陷型	1	0	1	0	2	7	3
A4759	ZL4886	98	80	89	no	女	2014-02-25	2014-02-25	SGA（小于胎龄儿）	40	0	2500	足月儿	1976-03-26		1981-10-10		168	75	26.57	158	50	40.06	自然怀孕	顺产	无	未保胎	无	未使用药物,降糖药	1	1	纯母乳喂养	12	否	4	7岁2月12天	7岁2月12天	7.2	7.2	2020-01-31	#REF!	注意力缺陷型	3	1	1	0	1	12	8
A4974	ZL5101	88.72		88.72	no	男	2010-04-04	2010-04-21	AGA（适于胎龄儿）	37	4	2600	足月儿	1981-10-11		1981-12-03		178	65	20.52	155	42	17.48	自然怀孕	剖宫产	无	未保胎	无	未使用药物	1	1	纯母乳喂养	10	否	2.5	10岁3月13天	10岁3月13天	10.29	10.29	2020-01-31	#REF!	注意力缺陷型	1	2	0	0	0	9	5
A51320	ZL51438	101.69		101.69	no	男	2013-12-21	2014-01-04	AGA（适于胎龄儿）	38	0	2600	足月儿																							8岁5月18天	8岁5月18天	8.47	8.47	2020-01-31	#REF!	多动冲动型	5	5	4	2	2	12	14
A5108	ZL5235	100	104	102	no	男	2014-08-23	2014-09-08	AGA（适于胎龄儿）	37	5	3050	足月儿	1983-08-04		1987-05-31		180	80	24.69	158	50	20.03	自然怀孕	顺产	无	未保胎	无	未使用药物	1	1	纯母乳喂养	12	是	4	6岁11月11天	6岁11月11天	6.95	6.95	2020-01-31	#REF!	混合型	9	9	5	0	1	24	20
A53193	ZL53311	111	110	113	no	男	2015-08-13	2015-09-03	AGA（适于胎龄儿）	37	0	2900	足月儿	1989-07-13	26									自然怀孕	顺产	无	未保胎	有		1	1					6岁10月23天	6岁10月23天	6.9	6.9	2020-01-31	#REF!	混合型	5	8	5	1	0	14	18
A53214	ZL53332	96	102	100	no	女	2014-06-23	2014-06-13	AGA（适于胎龄儿）	41	3	3350	足月儿																	1	1					8岁0月12天	8岁0月12天	8.03	8.03	2020-01-31	#REF!	混合型	3	3	1	0	2	10	11
A5211	ZL5338	91	117	103	no	男	2013-08-27	2013-09-01	AGA（适于胎龄儿）	39	2	3500	足月儿	1988-11-20		1988-08-27		175	75	24.49	159	58.5	23.14	自然怀孕	剖宫产	无	未保胎	无	未使用药物	1	1	混合喂养（配方奶为主）	3	否	1.5	6岁10月25天	6岁10月25天	6.9	6.9	2020-01-31	#REF!	混合型	7	7	3	0	0	21	17
A5321	ZL5448	109.67		109.67	yes	男	2008-12-04	2008-12-04	AGA（适于胎龄儿）	40	0	3746	足月儿	1972-05-07		1978-05-17		181	76	23.2	168	64	22.68	自然怀孕	剖宫产	无	未保胎	有	未使用药物	2	1	混合喂养（母乳为主）	0	是	2	11岁7月17天	11岁7月17天	11.63	11.63	2020-01-31	#REF!	混合型	1	3	0	0	0	7	9
A54708	ZL54825	102	95	99	no	男	2011-09-28	2011-09-28	AGA（适于胎龄儿）	40	0	3200	足月儿												剖宫产											10岁9月29天	10岁9月29天	10.83	10.83	2020-01-31	#REF!	混合型	9	5	6	0	0	24	17
A55154	ZL55271	106	117	112	no	男	2016-08-10	2016-08-12	SGA（小于胎龄儿）	39	5	2100	足月儿																							5岁11月23天	5岁11月23天	5.98	5.98	2020-01-31	#REF!	混合型	5	7	3	0	0	16	20
A55448	ZL55565	107	101	104	no	男	2015-02-24	2015-02-24	AGA（适于胎龄儿）	40	0	4150	足月儿																							7岁5月8天	7岁5月8天	7.44	7.44	2020-01-31	#REF!	注意力缺陷型	6	3	1	0	0	16	11
A55453	ZL55570	93	90	90	no	男	2013-08-26	2013-08-26	AGA（适于胎龄儿）	40	0	3500	足月儿																							8岁11月11天	8岁11月11天	8.95	8.95	2020-01-31	#REF!	注意力缺陷型	6	0	0	0	0	17	1
A55458	ZL55575	109	129	122	no	男	2015-08-27	2015-08-27	AGA（适于胎龄儿）	40	0	3030	足月儿											自然怀孕	顺产	无	未保胎	无		3	2					6岁11月9天	6岁11月9天	6.94	6.94	2020-01-31	#REF!	注意力缺陷型	7	1	0	0	0	16	5
A5523	ZL5650	101.08		101.08	no	男	2010-07-23	2010-08-06	AGA（适于胎龄儿）	38	0	3300	足月儿	1982-02-16		1982-09-28		172	80	27.04	158	55	22.03	自然怀孕	剖宫产	无	未保胎	无	其他	1	1	混合喂养（配方奶为主）	1	是	3.5	10岁2月3天	10岁2月3天	10.17	10.17	2020-01-31	#REF!	注意力缺陷型	0	0	0	0	0	8	3
A56614	ZL56731	78.63		78.63	no	男	2008-08-16	2008-08-18	AGA（适于胎龄儿）	39	5	3000	足月儿											自然怀孕	剖宫产	无	未保胎	无		1	1					14岁0月1天	14岁0月1天	14	14	2020-01-31	#REF!	注意力缺陷型	9	0	6	0	1	26	6
A57991	ZL58108	74.58		74.58	no	男	2013-09-22	2013-09-08	SGA（小于胎龄儿）	42	0	2980	过期产儿																							8岁11月8天	8岁11月8天	8.94	8.94	2020-01-31	#REF!	混合型	4	6	5	0	0	14	18
A5698	ZL5825	96.61		96.61	no	男	2013-07-01	2013-07-29	AGA（适于胎龄儿）	36	0	2600	早产儿	1979-07-03		1984-01-27		182	85	25.66	160	65	25.39	自然怀孕	剖宫产	无	未保胎	无	未使用药物	1	1	纯母乳喂养	5	是	2	7岁0月23天	7岁0月23天	7.06	7.06	2020-01-31	#REF!	混合型	4	5	3	0	0	13	14
A5718	ZL5845	89.65		89.65	no	男	2011-11-12	2011-11-14	LGA（大于胎龄儿）	39	5	4150	足月儿	1979-10-29		1981-04-03		168	65	23.03	163	55	20.7	自然怀孕	剖宫产	无	孕早期保胎（怀孕前3月）	无	未使用药物	2	2	混合喂养（配方奶为主）	6	否	1	8岁8月12天	8岁8月12天	8.7	8.7	2020-01-31	#REF!	混合型	6	8	4	1	0	16	17
A5733	ZL5860	69.71		69.71	no	男	2013-03-22	2013-04-12	AGA（适于胎龄儿）	37	0	3300	足月儿	1985-01-04		1985-10-24		170	120	41.52	167	62.5	48.41	自然怀孕	顺产	无	未保胎	无	未使用药物	1	1	混合喂养（配方奶为主）	0	否	0	7岁8月7天	7岁8月7天	7.69	7.69	2020-01-31	#REF!	注意力缺陷型	4	3	0	0	0	13	10
A5925	ZL6052	86	87	85	no	男	2010-10-12	2010-10-12	AGA（适于胎龄儿）	40	0	3650	足月儿	1976-10-08		1977-10-01		170	75	25.95	170	65	22.49	自然怀孕	剖宫产	无	孕早期保胎（怀孕前3月）	无	未使用药物	1	1	纯母乳喂养	1	否	2.5	9岁11月12天	9岁11月12天	9.95	9.95	2020-01-31	#REF!	注意力缺陷型	4	1	1	1	1	12	6
A60648	ZL60765	93.85		93.85	no	男	2015-04-02	2015-03-26	AGA（适于胎龄儿）	41	0	3400	足月儿																							7岁6月3天	7岁6月3天	7.51	7.51	2020-01-31	#REF!	注意力缺陷型	6	2	4	1	2	16	10
A6066	ZL6193	108.84		108.84	no	男	2012-06-12	2012-07-03	AGA（适于胎龄儿）	37	0	3300	足月儿	1984-03-24		1987-09-27		176	80	25.83	160	66	25.78	自然怀孕	剖宫产	无	未保胎	无	未使用药物	1	1	混合喂养（母乳为主）	8	否	6	8岁1月17天	8岁1月17天	8.13	8.13	2020-01-31	#REF!	混合型	7	7	0	0	0	20	20
A6213	ZL6340	73.31		73.31	yes	男	2008-08-25	2008-09-01	AGA（适于胎龄儿）	39	0	3000	足月儿	1967-01-01		1977-02-28		164	60	22.31	164	62	23.05	自然怀孕	顺产	无	未保胎	无	未使用药物	2	2	人工喂养	0	否	1	11岁11月5天	11岁11月5天	11.93	11.93	2020-01-31	#REF!	注意力缺陷型	3	0	0	0	0	12	5
A6242	ZL6369	83.68		83.68	no	男	2011-07-20	2011-07-20	AGA（适于胎龄儿）	40	0	3500	足月儿	1973-11-01		1979-04-03		185	80	23.37	170	54	18.69	自然怀孕	顺产	无	未保胎	无	未使用药物	1	1	纯母乳喂养	3	否	4	9岁0月10天	9岁0月10天	9.03	9.03	2020-01-31	#REF!	注意力缺陷型	5	2	3	0	0	15	10
A6301	ZL6428	81.95		81.95	no	男	2014-02-12	2014-02-28	AGA（适于胎龄儿）	37	5	2700	足月儿	1978-08-04		1983-03-03		170	65	22.49	158	46	18.43	自然怀孕	顺产	无	未保胎	无	未使用药物	3	2	混合喂养（母乳为主）	3	否	0.5	6岁5月18天	6岁5月18天	6.47	6.47	2020-01-31	#REF!	混合型	5	9	5	1	0	14	24
A6313	ZL6440	92.84		92.84	no	男	2012-08-05	2012-08-03	AGA（适于胎龄儿）	40	2	3190	足月儿	1985-04-16		1987-08-28		180	114	35.19	158	53	21.23	自然怀孕	顺产	无	未保胎	无	未使用药物	2	1	混合喂养（配方奶为主）	1	否	4	7岁11月25天	7岁11月25天	7.99	7.99	2020-01-31	#REF!	注意力缺陷型	5	3	0	1	1	16	10
A576	ZL703	82	86	82	no	女	2012-09-05	2012-09-11	SGA（小于胎龄儿）	39	0	3000	足月儿	1984-06-26		1984-03-11								自然怀孕	顺产	无	未保胎	无	未使用药物	1		混合喂养（配方奶为主）	12	否	2.5	8岁4月4天	8岁4月4天	8.34	8.34	2020-01-31	#REF!	注意力缺陷型	7	1	0	0	1	22	5
A656	ZL783	108.62		108.62	no	女	2010-03-30	2010-04-19	AGA（适于胎龄儿）	37	0	2800	足月儿	1980-03-02		1982-12-05								自然怀孕	剖宫产	缺氧窒息	孕早期保胎（怀孕前3月）	无	未使用药物	1		人工喂养	0	否	1	10岁9月22天	10岁9月22天	10.81	10.81	2020-01-31	#REF!	注意力缺陷型	1	1	5	0	0	9	7
[truncated: 15 more columns]
